# Supplementary material for: Permissive parenting of the dog associates with dog overweight in a survey among 2,303 Dutch dog owners
Source: PLoS One. 2020 Aug 11;15(8):e0237429. doi: 10.1371/journal.pone.0237429 (PMC7418960; doi:10.1371/journal.pone.0237429)
Supplement: S1 Data — (XLSX) [file pone.0237429.s005.xlsx]

## Sheet: Data_categorized
VoterID	D_AUI	D_AUN	D_AUT	AUTV	AUTN	PERM	BCS	Quartile>	0-25%	25-50%	50-75%	75-100%
29501	C	B	A	B	B	B	H	AUTN	≤14.58	≤22.92	≤33.33	≤83.33
29502	D	A	D	D	A	A	H	AUTV	≤66.67	≤75.00	≤81.67	≤100.00
29503	C	A	B	D	A	D	H	PERM	≤18.75	≤25.00	≤35.00	≤91.67
29504	C	A	A	A	A	B	H
29507	D	B	B	D	B	D	H	D-AUN	≤12.50	≤21.88	≤31.25	≤84.38
29508	C	A	A	B	A	B	H	D-AUT	≤75.00	≤87.50	≤91.67	≤100.00
29510	D	B	B	D	C	B	U	D-AUI	≤50.00	≤65.00	≤75.00	≤100.00
29513	B	D	A	B	D	B	H
29514	D	B	D	D	B	B	U	BCS
29515	D	B	B	C	B	D	H	1-3	U	Underweight
29519	D	D	A	B	D	B	H	4-5	H	Healthy weight
29520	B	B	C	C	B	B	H	6-9	O	Overweight/obese
29521	B	A	D	C	A	B	H
29522	A	D	B	A	D	A	H
29523	A	B	D	A	B	B	H
29524	B	D	B	B	D	C	H
29526	B	D	B	C	D	B	H
29527	C	C	A	B	C	D	H
29529	A	C	B	A	C	A	H
29531	A	C	A	A	C	D	H
29533	B	C	A	A	C	C	H
29534	B	B	D	C	B	A	H
29535	C	B	A	B	B	C	H
29537	B	B	A	B	B	C	H
29538	A	C	A	A	C	A	H
29540	D	D	A	B	C	A	H
29541	A	B	B	B	C	D	H
29545	C	B	B	D	B	B	H
29546	A	A	D	A	A	C	H
29547	A	B	B	A	B	A	H
29548	C	C	A	A	C	C	H
29549	B	A	B	B	A	B	H
29552	D	B	A	B	A	C	H
29553	C	A	A	A	B	A	U
29556	B	B	A	A	C	C	H
29557	D	A	B	D	B	D	H
29558	C	D	A	B	C	D	U
29559	C	B	A	B	A	B	H
29560	A	C	A	A	C	A	U
29563	B	A	B	B	A	C	H
29565	B	B	A	A	B	D	H
29566	C	A	A	B	A	A	U
29567	B	D	C	B	D	A	H
29568	B	D	B	C	C	A	U
29569	A	A	D	A	B	A	H
29570	B	D	B	B	D	B	H
29573	A	D	A	A	D	C	H
29574	A	C	D	C	C	A	U
29575	A	C	B	A	C	C	U
29577	B	A	A	A	B	C	H
29578	D	B	A	B	B	C	H
29579	B	C	A	A	B	A	U
29580	A	A	C	A	B	A	H
29582	A	C	A	A	C	A	H
29583	A	A	B	A	B	C	U
29584	B	D	B	B	C	A	H
29585	A	D	A	A	D	C	H
29586	B	B	B	B	B	B	U
29588	D	A	D	D	A	C	H
29589	A	A	D	B	B	A	H
29590	A	B	A	A	C	B	H
29593	B	B	B	B	B	A	H
29594	B	A	D	B	A	B	H
29595	A	A	A	A	B	B	U
29596	C	A	B	C	A	B	H
29599	B	A	D	C	A	A	H
29602	A	C	B	A	C	A	H
29603	A	D	A	B	C	D	H
29604	C	C	B	C	C	B	H
29605	B	C	D	C	C	A	H
29610	C	A	B	C	A	C	H
29612	D	D	A	B	D	B	H
29613	C	C	A	B	C	B	U
29616	C	C	D	C	C	A	H
29617	D	A	B	C	A	D	U
29618	A	D	D	B	C	B	H
29620	A	C	B	A	B	B	H
29621	D	A	A	C	A	B	H
29623	B	C	C	C	C	D	U
29624	A	D	A	A	D	B	H
29625	A	A	B	A	B	C	H
29626	A	B	D	A	C	C	U
29629	A	D	B	A	D	C	H
29637	A	B	D	B	C	A	U
29638	A	B	A	B	B	A	H
29639	A	C	A	A	D	C	H
29640	A	D	B	B	D	A	H
29641	B	B	C	B	B	B	H
29642	C	A	D	D	A	C	H
29643	D	C	A	D	D	D	H
29644	C	A	D	D	A	A	H
29645	C	A	A	B	B	D	H
29647	C	D	A	B	D	D	H
29648	B	B	B	B	C	A	O
29650	C	D	A	B	D	C	H
29655	B	D	B	C	D	D	U
29658	B	A	A	A	A	B	H
29659	A	D	B	A	D	C	H
29660	B	D	A	B	D	D	H
29661	B	B	B	B	B	C	H
29662	B	C	A	A	C	D	H
29664	A	D	A	A	D	D	U
29665	A	D	B	B	D	D	H
29669	A	A	D	A	B	A	U
29670	C	C	C	C	C	B	H
29671	C	A	D	D	A	D	H
29673	B	C	A	A	C	D	H
29675	A	D	A	A	D	C	H
29676	B	C	A	A	D	C	U
29677	C	B	B	B	B	A	U
29678	A	A	A	A	B	A	H
29679	A	C	B	B	C	D	U
29680	D	B	D	D	B	A	H
29681	A	C	B	A	C	B	H
29684	A	B	B	A	B	A	U
29685	A	D	A	A	D	C	U
29686	C	B	C	D	C	A	H
29687	A	D	B	B	C	A	H
29691	B	B	A	B	B	D	H
29692	D	A	B	D	A	C	U
29693	B	C	D	D	C	D	H
29694	D	C	D	D	C	A	U
29695	B	A	A	A	A	C	O
29696	C	B	B	B	B	B	H
29698	A	A	A	A	A	A	H
29699	B	B	D	C	C	B	H
29700	A	D	D	B	D	B	U
29703	C	A	C	C	A	B	U
29704	C	C	A	C	C	D	H
29705	A	D	A	A	C	A	H
29707	C	B	A	B	C	D	U
29712	D	A	D	D	A	D	H
29715	D	A	D	D	A	D	H
29717	A	D	A	A	D	D	H
29718	A	B	B	A	B	A	H
29719	A	A	A	A	B	B	H
29721	D	A	D	D	A	C	H
29722	B	B	C	B	B	B	U
29723	B	A	B	C	A	D	O
29724	C	A	A	A	A	C	H
29725	A	B	B	C	C	C	U
29726	A	A	B	A	A	C	O
29727	D	A	C	D	A	B	H
29728	B	C	A	A	C	D	H
29729	A	B	D	B	B	B	H
29730	C	A	C	B	A	D	H
29731	D	A	D	C	A	A	U
29733	B	B	D	B	C	A	H
29734	A	A	D	B	A	A	H
29736	D	D	A	C	C	D	U
29737	D	A	B	D	A	D	H
29739	D	A	D	D	A	B	U
29740	D	C	D	D	C	A	U
29741	A	B	A	A	B	A	H
29742	D	B	B	C	C	D	H
29743	C	D	A	B	D	D	H
29745	A	D	A	A	C	B	H
29746	A	D	A	A	D	D	H
29747	D	A	D	D	A	B	U
29748	D	B	A	C	B	D	U
29749	A	B	A	B	B	B	H
29750	D	A	C	D	A	D	H
29751	A	D	D	A	C	A	H
29752	B	C	B	A	C	C	H
29753	D	A	C	D	B	C	H
29754	D	A	B	C	A	A	H
29755	B	B	B	B	B	A	H
29756	C	D	D	D	D	C	U
29757	D	B	B	D	A	D	H
29758	A	A	A	A	A	B	U
29760	D	B	D	D	A	B	H
29761	D	A	B	D	A	D	O
29762	A	C	D	B	C	B	U
29764	A	A	B	A	A	C	H
29765	C	C	A	B	C	C	H
29766	D	A	D	D	A	C	O
29767	D	B	B	D	B	A	H
29769	D	D	D	D	D	C	H
29771	A	B	D	B	B	A	H
29772	A	D	A	A	D	D	H
29773	C	B	B	C	C	B	U
29774	C	C	C	C	C	C	H
29775	C	D	A	B	D	D	U
29777	D	A	D	D	A	A	H
29779	A	B	A	A	C	B	H
29780	C	A	B	B	B	C	H
29781	A	D	B	A	D	A	H
29783	C	D	A	B	D	C	H
29784	D	B	D	D	B	B	U
29785	D	A	C	D	A	D	U
29786	A	D	B	A	D	D	H
29788	C	C	A	C	B	C	H
29789	C	B	A	B	B	B	O
29790	D	A	D	D	A	B	H
29791	C	C	B	C	C	A	H
29793	C	A	D	B	B	B	H
29794	D	A	B	C	B	C	H
29796	D	A	D	D	A	D	H
29798	D	B	B	C	A	C	H
29799	C	A	D	C	A	A	H
29800	B	C	B	B	C	A	H
29801	D	B	A	C	B	C	H
29802	B	A	D	B	A	D	H
29803	A	D	B	B	D	A	H
29805	B	D	B	C	D	B	H
29806	B	A	B	B	B	B	H
29809	D	D	C	D	D	D	U
29810	A	C	A	A	C	B	H
29812	C	B	A	A	B	A	H
29814	B	A	B	C	B	D	U
29815	B	D	D	C	D	C	H
29816	D	B	D	D	B	A	H
29817	C	B	D	B	C	D	H
29818	B	D	A	A	D	C	U
29819	C	C	B	B	C	A	U
29820	B	A	D	B	A	A	H
29821	C	A	B	B	A	A	H
29822	C	A	B	C	A	A	H
29823	C	C	B	D	C	C	H
29824	C	A	A	B	A	B	H
29827	A	D	A	A	D	D	H
29828	A	A	D	B	A	A	U
29829	A	C	B	A	D	B	U
29830	D	A	D	D	A	A	H
29831	C	B	A	B	B	D	H
29833	D	D	D	D	D	D	H
29835	D	C	C	D	C	B	H
29836	A	D	D	B	C	A	O
29838	B	A	D	B	B	C	H
29840	D	B	B	D	B	A	H
29841	D	C	B	D	C	C	H
29842	A	A	B	A	A	A	H
29844	A	C	B	A	C	C	H
29845	A	B	A	A	B	C	H
29846	A	A	A	A	C	C	H
29847	A	B	D	B	B	B	U
29848	C	A	A	C	B	B	H
29849	D	C	D	D	C	D	H
29851	D	B	C	D	C	C	U
29852	A	B	B	A	C	A	H
29868	C	B	B	C	C	B	H
29869	D	A	D	D	A	D	H
29870	A	D	A	A	C	A	U
29874	B	A	D	C	A	B	H
29875	D	A	A	B	A	D	H
29876	A	A	C	C	A	A	H
29878	A	B	C	A	B	A	U
29879	C	D	B	C	D	A	H
29880	B	B	B	B	B	A	H
29883	B	B	B	B	C	B	H
29885	A	C	B	B	D	A	U
29886	A	B	A	A	B	B	H
29887	A	C	D	B	D	D	U
29888	A	D	A	A	D	A	U
29889	A	B	A	A	B	A	H
29890	A	D	D	B	D	C	H
29891	A	C	A	A	C	C	H
29892	D	C	D	D	C	A	U
29893	D	A	D	D	A	C	U
29894	B	B	B	B	B	A	H
29895	C	B	B	B	B	D	H
29896	A	D	A	A	D	B	H
29897	B	C	C	C	C	B	H
29901	B	B	A	B	C	B	H
29902	D	B	D	D	B	D	U
29903	A	B	D	C	B	C	U
29904	C	C	D	D	C	B	U
29905	C	D	B	B	D	A	H
29906	A	C	B	A	B	A	H
29907	D	A	B	D	A	B	H
29908	A	D	B	B	D	C	H
29909	C	A	B	D	B	A	H
29910	C	D	A	A	C	C	H
29911	A	D	A	A	D	B	H
29912	A	A	C	A	A	C	H
29914	B	C	B	B	D	A	H
29915	A	A	A	A	B	D	H
29917	D	C	B	D	C	C	H
29918	B	D	B	C	D	B	H
29920	D	A	D	D	A	C	U
29921	D	A	D	D	A	B	U
29922	D	B	B	D	B	C	U
29923	B	A	D	C	A	A	U
29924	A	B	B	A	B	B	U
29925	D	C	B	D	B	D	U
29926	C	C	B	C	C	C	H
29927	C	B	B	C	B	B	H
29928	C	C	C	D	B	A	H
29931	A	A	A	A	A	A	H
29932	A	D	B	A	D	C	H
29933	C	C	D	D	C	B	U
29934	A	C	A	A	C	B	H
29935	D	A	D	D	A	B	H
29936	C	A	B	C	A	B	O
29939	A	B	C	A	C	A	H
29940	C	D	B	C	D	D	H
29941	D	B	D	D	A	D	H
29942	C	B	C	D	C	C	H
29943	C	A	C	C	A	D	H
29946	C	B	B	C	B	D	H
29947	B	D	A	B	D	D	H
29949	A	B	A	A	A	D	U
29950	B	D	A	A	D	D	H
30906	D	A	D	D	A	C	H
30907	C	D	B	C	D	A	H
30908	D	B	A	C	B	B	H
30910	D	B	D	D	B	D	H
30911	D	A	D	D	A	A	U
30912	D	B	D	D	A	D	H
30913	D	A	D	D	A	D	H
30914	C	A	D	D	A	A	H
30915	B	D	B	C	D	D	H
30916	B	D	C	B	D	B	H
30917	B	D	A	B	D	D	H
30918	A	C	A	A	C	A	H
30919	C	B	D	C	C	A	H
30920	C	A	D	D	B	A	H
30921	C	A	C	B	B	A	U
30922	D	A	B	D	A	B	H
30923	C	D	D	C	D	B	H
30925	C	A	B	C	A	A	H
30926	A	D	A	A	D	B	H
30927	B	C	A	A	C	D	H
30928	D	A	D	D	A	B	H
30929	B	D	B	B	D	A	H
30930	A	D	C	A	D	A	U
30931	A	A	A	A	A	A	H
30932	B	D	B	B	D	C	H
30933	C	D	A	B	D	B	U
30936	A	A	B	A	A	A	H
30937	A	A	C	B	B	A	H
30938	A	A	C	A	C	C	H
30939	C	B	D	C	B	D	H
30940	D	A	C	D	A	C	O
30941	A	B	B	B	B	B	H
30942	D	D	D	D	D	B	H
30943	D	A	D	D	A	C	H
30944	C	A	A	C	B	D	H
30945	B	A	C	B	B	B	H
30946	C	B	A	C	B	D	U
30947	D	D	B	D	C	C	H
30948	A	D	D	B	D	B	O
30949	C	D	A	B	D	A	U
30950	C	C	A	B	C	D	H
30951	A	B	C	A	C	A	H
30952	B	A	A	A	A	C	H
30953	B	A	D	B	A	A	H
30954	A	B	A	A	C	A	H
30956	D	A	D	D	A	D	O
30957	D	A	C	D	A	C	H
30958	D	A	D	D	A	B	U
30959	D	A	D	D	B	A	H
30963	A	B	B	B	C	A	H
30964	D	A	C	D	A	C	H
30965	D	A	B	D	A	C	H
30966	B	B	B	B	B	B	U
30967	A	A	A	A	A	A	H
30968	B	A	C	B	B	A	U
30970	D	A	D	D	A	C	H
30971	B	D	B	A	D	C	U
30972	D	D	D	D	D	D	H
31905	C	D	B	C	D	D	H
31906	A	C	B	B	D	A	H
31908	C	D	C	D	D	C	H
31909	A	D	A	A	D	C	H
31911	A	B	B	A	C	B	H
31912	A	C	B	B	D	A	U
31914	D	A	D	D	B	A	H
31915	B	A	B	B	A	A	U
31916	A	C	D	B	D	A	U
31917	D	B	B	D	A	C	H
31918	B	B	B	C	B	A	H
31920	A	D	A	A	D	B	H
31921	C	B	B	C	A	D	U
31922	D	A	B	D	B	D	H
31923	A	A	B	B	A	C	H
31924	A	A	D	B	A	A	H
31925	A	A	B	B	B	C	H
31926	C	A	A	C	A	C	H
31927	C	A	C	D	B	B	U
31932	A	D	A	A	D	C	H
31933	B	A	B	C	B	B	H
31935	A	D	B	B	D	C	H
31937	D	B	D	D	C	B	U
31939	C	C	B	D	C	A	H
31940	D	D	C	D	D	C	U
31941	C	A	B	B	A	C	H
31942	B	D	A	B	D	D	H
31943	B	C	D	C	B	C	H
31944	A	A	A	A	A	C	H
31945	C	D	B	C	C	C	H
31946	A	B	A	A	B	B	H
31947	A	D	B	A	D	A	H
31948	A	B	C	A	B	C	H
31949	D	C	D	D	C	C	H
31950	C	C	D	D	D	D	H
31951	B	A	C	B	A	C	H
31952	D	A	D	D	A	D	H
31954	B	B	B	C	C	D	U
31955	D	A	B	C	A	D	H
31956	D	B	B	C	C	A	H
31957	B	A	C	B	A	C	H
31958	A	D	A	A	C	A	H
31959	A	C	D	A	D	A	H
31960	A	A	A	A	A	A	H
31962	C	B	B	C	A	C	H
31963	C	A	B	C	A	A	U
31964	D	A	D	D	A	A	H
31965	D	C	B	C	C	C	H
31966	B	A	C	A	A	A	H
31967	A	A	A	A	A	A	H
31968	D	B	B	D	C	C	U
31969	C	B	B	C	C	D	H
31970	C	C	B	B	C	C	H
31973	C	D	A	B	D	D	O
31974	D	B	D	D	B	A	U
31975	D	A	D	D	B	A	H
31976	A	B	B	A	B	A	H
31977	A	A	B	A	A	A	H
31978	A	B	C	B	D	B	U
31979	A	B	B	B	B	A	H
31980	D	A	D	D	A	C	O
31981	A	A	D	A	B	A	H
31982	A	C	A	A	C	C	H
31983	A	D	A	A	C	C	U
31984	D	A	B	D	A	D	H
31985	B	D	B	B	D	D	O
31986	C	A	C	D	A	A	H
31987	A	D	D	A	D	A	U
31988	A	B	B	B	B	A	H
31989	C	D	A	B	D	D	H
31990	A	B	B	A	B	A	H
31991	C	A	D	D	A	A	H
31993	C	D	D	D	D	D	H
31994	C	A	B	C	A	D	H
31995	C	C	B	B	B	C	U
31996	C	C	B	C	C	B	U
31997	D	A	C	D	A	B	H
31998	D	A	B	C	B	C	U
32000	D	A	D	D	A	C	H
32001	C	B	B	B	B	D	H
32002	B	A	D	C	B	B	U
32003	C	B	B	B	A	D	H
32004	A	C	A	A	C	B	H
32005	A	A	B	B	A	A	H
32006	D	A	D	D	A	D	H
32007	A	A	C	B	A	A	H
32008	C	A	D	C	A	B	H
32009	B	C	A	B	C	D	H
32010	C	D	A	B	D	A	H
32012	D	C	B	D	C	C	H
32013	D	A	D	D	A	C	H
32014	D	C	B	D	D	D	H
32015	C	B	B	C	C	C	H
32016	C	B	B	C	B	B	H
32017	C	C	B	C	D	D	H
32018	B	C	A	A	C	C	O
32019	D	A	D	D	A	B	H
32020	C	B	C	D	C	D	H
32021	D	A	B	D	A	A	H
32022	D	A	D	D	A	A	U
32023	C	B	C	C	B	D	H
32024	A	C	D	A	C	A	H
32025	C	B	D	C	C	C	U
32026	A	D	D	B	D	A	H
32027	C	C	B	C	C	C	H
32028	C	B	D	C	B	B	U
32029	B	A	C	B	A	B	H
32030	A	A	A	A	A	A	H
32032	D	B	D	C	B	B	H
32034	B	A	B	C	B	B	H
32035	D	A	C	D	A	B	H
32036	D	A	D	D	A	C	U
32037	D	B	B	B	B	B	H
32038	D	D	D	D	D	C	H
32039	B	B	B	B	B	A	H
32040	D	C	B	D	C	C	U
32041	A	D	C	A	D	A	U
32042	B	A	A	A	A	D	H
32043	B	D	A	A	C	C	H
32044	B	D	C	D	D	D	H
32045	D	A	B	D	B	D	H
32047	B	C	A	B	C	C	H
32048	A	A	A	A	A	A	H
32049	C	D	A	C	C	C	H
32050	A	B	C	B	C	B	O
32052	D	A	D	D	B	D	H
32053	D	D	B	C	D	C	H
32054	B	D	C	C	D	B	H
32055	B	A	B	B	A	C	H
32056	B	B	B	B	B	B	U
32057	D	A	B	C	B	D	O
32059	C	C	B	D	C	A	H
32060	D	C	C	D	C	D	H
32061	A	C	B	A	C	B	H
32062	A	C	A	B	D	B	H
32063	C	A	D	D	A	A	H
32064	D	A	B	D	A	D	H
32065	B	B	C	B	C	B	H
32068	D	A	D	C	A	C	U
32069	A	C	A	A	C	B	H
32070	C	D	B	B	D	B	H
32072	A	B	B	B	B	A	U
32073	D	B	B	D	A	A	H
32075	B	A	B	B	B	C	U
32076	B	C	A	A	C	C	U
32077	C	A	B	C	B	D	H
32078	B	A	A	A	A	B	H
32079	D	D	B	D	D	C	H
32080	C	C	C	C	B	B	H
32081	D	B	C	D	B	C	H
32082	B	B	D	C	C	D	U
32083	B	D	D	B	D	A	H
32084	B	A	D	C	A	A	H
32085	C	D	B	C	D	B	H
32086	C	D	C	D	C	D	O
32087	C	D	A	A	C	C	H
32090	C	A	B	C	A	B	H
32091	B	A	D	D	B	C	H
32092	B	B	B	B	B	C	H
32094	A	A	D	B	B	A	H
32095	A	D	B	C	D	C	H
32096	B	B	A	A	B	C	H
32097	D	B	D	D	B	C	H
32098	D	D	D	D	D	D	U
32099	A	C	D	B	D	A	H
32100	D	C	B	C	C	A	H
32102	D	A	C	D	A	B	H
32103	D	A	B	D	B	A	U
32105	D	A	D	D	A	A	H
32108	C	B	B	D	A	C	H
32109	D	B	B	D	C	B	U
32110	C	C	A	A	B	B	H
32111	C	D	A	B	D	D	H
32112	B	D	A	A	C	B	H
32113	D	B	D	D	B	C	H
32115	D	A	C	D	A	C	U
32116	C	C	B	C	B	D	U
32117	A	D	A	A	D	A	H
32118	D	A	D	D	A	C	H
32119	C	C	B	C	C	B	H
32120	C	A	B	B	B	A	H
32121	A	B	B	A	C	B	U
32122	D	D	A	C	D	B	U
32123	D	A	A	C	A	D	O
32125	C	D	A	B	C	B	O
32126	C	B	B	C	B	A	H
32127	D	A	C	D	A	C	H
32129	C	B	B	C	C	C	H
32130	A	B	B	A	B	A	H
32131	C	D	B	C	D	D	U
32132	B	D	B	B	D	D	H
32134	C	B	B	C	B	B	U
32135	D	A	B	D	A	C	U
32136	B	A	D	C	A	C	H
32137	A	B	C	B	C	A	H
32139	C	A	B	C	A	C	H
32141	B	B	D	C	B	A	U
32142	C	A	D	D	B	D	U
32144	C	C	A	C	C	B	H
32146	D	C	B	D	C	B	H
32147	A	D	A	B	D	B	H
32148	B	D	A	A	D	D	H
32149	A	A	B	A	A	A	U
32151	B	B	B	C	C	A	H
32152	A	B	A	A	B	B	H
32155	C	D	B	D	C	A	H
32156	D	A	A	D	A	D	H
32158	D	B	D	D	C	A	U
32159	A	B	A	A	B	B	H
32160	C	B	A	B	C	D	H
32162	B	A	B	A	B	C	H
32164	A	D	A	A	D	D	H
32165	D	B	D	D	B	C	H
32166	C	D	A	B	D	C	H
32167	A	A	D	A	A	A	U
32168	D	A	D	D	A	B	H
32169	D	B	B	C	B	B	H
32170	C	B	B	C	B	D	H
32171	D	A	D	D	A	D	H
32172	D	A	C	D	A	B	H
32175	C	D	B	C	D	D	H
32176	C	A	B	C	B	D	H
32178	A	A	B	A	A	A	H
32179	A	B	B	A	B	B	O
32180	D	B	D	D	B	D	H
32181	D	C	D	D	B	B	U
32183	C	D	B	C	C	A	H
32184	C	B	B	C	B	B	H
32185	D	B	D	D	A	B	H
32187	D	A	B	D	A	D	H
32189	A	D	C	A	D	A	U
32190	A	C	A	A	C	D	H
32191	C	C	A	B	C	D	H
32192	D	C	D	D	C	D	H
32193	C	A	B	C	B	B	O
32194	B	A	D	B	A	A	H
32195	A	C	B	A	C	A	H
32196	D	A	D	D	A	D	H
32197	C	B	B	C	B	C	H
32198	D	A	C	D	A	C	H
32199	C	A	D	B	A	B	U
32200	C	A	A	B	A	B	H
32201	A	A	B	A	A	A	H
32202	D	D	D	D	C	B	H
32204	D	D	C	D	D	D	H
32205	B	B	A	A	C	B	H
32209	C	D	A	B	D	A	H
32210	B	A	D	C	A	A	H
32211	D	B	D	D	B	A	H
32212	D	A	C	D	A	C	U
32214	A	B	A	A	B	C	U
32215	B	D	B	B	D	B	O
32216	D	A	D	D	A	A	H
32217	A	C	B	B	C	A	H
32218	D	A	D	D	A	C	H
32219	D	A	D	D	A	C	H
32220	C	A	B	D	A	B	H
32221	A	A	A	A	B	A	H
32223	A	C	C	A	C	C	U
32224	C	A	A	A	B	B	H
32226	B	D	A	B	D	C	U
32228	D	C	B	D	D	B	U
32231	D	A	B	D	A	D	H
32234	C	D	B	C	D	D	H
32235	B	B	D	C	B	D	U
32238	A	A	B	A	A	B	U
32242	B	A	A	B	B	B	H
32244	B	B	D	B	B	A	U
32245	C	A	B	B	A	B	H
32246	C	D	A	B	D	C	H
32248	C	D	D	D	D	C	H
32250	B	A	D	D	A	B	H
32251	D	B	C	D	B	C	H
32252	D	B	D	D	B	B	H
32253	B	C	C	B	C	C	H
32256	D	A	B	C	A	B	H
32257	A	C	A	A	B	B	H
32258	C	A	A	B	B	B	H
32259	D	A	B	D	A	D	H
32260	D	A	D	D	A	C	U
32261	C	C	A	B	C	D	H
32262	C	B	D	C	B	A	H
32263	B	B	D	B	B	A	H
32264	C	D	D	D	D	D	O
32265	A	B	B	A	B	C	H
32266	B	B	B	B	B	C	H
32267	A	D	A	A	D	A	U
32268	A	C	C	A	C	A	U
32269	D	A	C	D	A	A	H
32271	D	A	C	D	A	D	H
32272	C	B	D	D	B	D	H
32273	B	A	D	C	A	A	H
32274	D	C	C	D	C	A	U
32275	A	B	D	A	B	A	H
32277	C	B	C	C	B	B	H
32278	A	C	B	A	C	B	H
32280	C	B	C	D	A	B	H
32281	D	D	C	D	D	C	H
32282	A	A	C	B	B	A	U
32283	D	B	B	D	B	B	H
32284	B	A	C	B	C	A	H
32285	D	D	D	D	D	D	H
32287	B	A	B	C	A	A	H
32288	D	C	B	D	C	A	H
32289	D	D	C	D	D	B	U
32290	D	A	D	D	C	D	H
32291	B	B	B	B	B	C	H
32292	D	A	B	D	A	D	H
32294	A	D	A	A	D	A	H
32297	A	B	B	A	B	C	H
32298	C	D	D	D	D	A	U
32299	A	C	B	A	B	B	H
32300	B	B	B	A	B	A	H
32301	C	B	B	C	B	D	H
32303	D	A	D	D	A	B	H
32305	C	D	B	C	D	B	U
32306	B	A	B	B	A	C	H
32307	B	D	A	A	D	D	H
32308	D	A	D	D	B	B	H
32309	A	C	C	A	C	B	H
32311	D	D	D	D	D	B	H
32313	A	D	A	A	D	B	H
32314	B	D	D	C	D	A	U
32317	D	A	A	D	A	C	O
32318	B	C	D	C	B	A	H
32319	B	B	B	B	B	A	O
32320	B	D	B	B	D	B	H
32321	D	A	D	D	A	D	H
32323	D	A	D	D	B	A	H
32324	D	A	D	D	A	B	H
32325	D	C	C	D	C	C	U
32326	C	A	B	C	B	C	H
32327	D	B	D	D	B	C	H
32330	B	B	B	B	B	B	U
32331	D	B	B	D	B	C	H
32332	A	D	C	B	D	C	H
32333	D	B	D	D	B	B	H
32334	B	D	D	B	D	B	H
32335	D	A	C	D	A	D	H
32336	A	D	D	B	D	A	H
32337	B	D	B	B	D	C	H
32338	C	C	A	C	C	D	O
32339	A	B	B	A	B	B	H
32340	C	A	D	D	B	A	H
32341	A	C	A	A	C	A	H
32343	C	A	B	C	A	A	H
32344	A	A	C	B	A	A	H
32346	C	A	C	C	A	D	U
32347	B	A	C	C	A	A	O
32348	B	A	B	B	A	B	H
32349	B	C	A	A	C	C	H
32350	B	B	B	C	B	C	O
32352	A	C	B	A	B	A	U
32354	B	C	B	B	C	A	H
32356	B	C	B	C	B	C	H
32362	B	D	B	C	D	B	H
32373	A	B	B	A	B	A	H
32375	D	B	D	D	B	B	O
32377	C	B	B	C	B	A	H
32378	A	C	D	B	C	A	H
32379	C	C	A	C	C	C	U
32380	B	D	A	B	D	D	H
32382	C	A	B	C	A	B	H
32383	A	A	D	B	A	A	H
32384	A	D	B	B	D	D	H
32385	D	C	D	D	C	C	H
32386	C	D	D	D	D	D	H
32387	D	D	B	D	D	A	H
32388	A	A	B	A	A	C	H
32389	D	A	B	D	A	D	H
32390	B	A	B	B	B	D	H
32391	B	C	B	B	C	C	U
32392	B	A	C	C	A	A	H
32393	C	C	A	B	C	D	U
32397	D	C	B	B	B	C	H
32398	B	B	A	A	B	A	H
32399	C	A	C	C	A	D	H
32400	C	B	B	C	B	A	H
32401	A	D	B	B	D	A	U
32403	C	B	A	B	C	D	H
32405	C	C	B	D	D	B	H
32406	B	B	D	C	C	A	H
32407	B	A	B	C	A	A	H
32408	C	D	D	C	D	B	H
32409	D	A	A	C	A	C	H
32410	A	B	D	A	B	A	O
32411	C	A	C	D	B	A	U
32412	A	B	B	B	B	A	H
32413	D	A	D	D	A	A	H
32414	B	A	D	C	B	A	H
32415	D	A	B	C	A	C	H
32416	D	A	D	D	A	A	H
32417	B	D	A	B	D	D	O
32418	D	A	D	D	A	A	H
32419	D	A	D	D	A	D	H
32420	D	A	D	C	A	B	H
32421	D	B	D	D	B	D	O
32422	D	B	D	D	C	C	U
32424	B	A	A	B	A	C	H
32426	B	C	B	B	C	A	U
32427	B	D	A	B	D	D	H
32428	C	B	D	C	B	C	H
32429	D	B	C	D	A	C	O
32431	C	D	D	D	D	C	O
32432	C	B	C	C	B	C	H
32433	D	B	B	D	B	D	H
32434	C	D	A	B	D	C	U
32435	B	D	D	C	D	B	H
32436	C	C	A	A	C	B	U
32437	C	D	C	B	C	C	H
32439	B	D	A	A	D	D	H
32440	D	A	A	D	A	B	H
32441	B	D	C	C	D	C	H
32442	D	A	C	D	B	D	U
32443	A	A	D	B	B	A	H
32446	A	D	A	A	D	B	H
32447	B	A	A	A	B	C	H
32448	C	D	D	C	D	B	U
32449	B	D	A	A	C	B	H
32450	B	A	B	B	A	B	H
32451	C	D	A	C	D	B	H
32452	A	A	B	A	B	A	U
32453	D	D	A	C	D	D	H
32454	C	A	A	B	A	D	U
32455	D	D	B	D	D	C	H
32456	B	D	B	B	D	B	U
32457	A	B	C	B	C	C	H
32458	A	D	C	B	D	C	H
32459	B	C	C	C	C	B	H
32460	A	A	D	A	B	B	H
32462	C	D	D	C	D	A	H
32463	C	C	B	C	C	B	H
32464	B	D	A	A	C	D	O
32466	D	A	D	D	A	D	H
32467	A	A	A	A	C	A	H
32468	A	D	D	B	D	D	U
32470	A	D	A	A	D	A	H
32471	C	C	B	B	B	D	H
32473	C	D	B	B	D	A	H
32474	C	A	D	C	B	A	U
32475	A	A	A	A	A	A	U
32476	C	D	D	C	D	C	H
32477	B	C	C	B	C	B	H
32478	B	D	C	B	D	A	H
32479	A	C	D	A	C	B	U
32480	D	C	B	C	B	B	H
32481	B	C	A	A	C	D	H
32483	C	A	D	D	A	A	H
32485	D	A	D	D	A	D	O
32486	C	A	C	D	A	C	U
32489	C	D	B	A	C	B	U
32490	D	B	D	D	C	B	H
32491	D	A	D	D	A	B	H
32493	A	B	D	B	B	B	H
32494	C	C	B	B	B	C	H
32495	C	A	D	C	A	B	U
32496	B	C	B	C	C	A	H
32497	B	B	B	B	C	D	H
32498	D	C	B	C	B	B	H
32500	D	A	C	D	A	C	H
32504	B	A	B	B	A	B	H
32506	D	D	A	B	D	D	H
32507	C	A	A	B	B	D	U
32508	C	D	A	C	D	C	H
32510	A	D	B	A	C	B	H
32511	B	A	A	B	B	C	H
32512	B	A	A	A	A	B	H
32513	B	B	B	B	B	A	H
32515	C	A	A	B	A	B	U
32516	A	C	A	A	C	B	O
32517	D	A	A	D	B	C	U
32518	D	A	C	D	A	A	U
32519	C	A	C	D	A	A	H
32520	D	D	D	D	D	D	H
32523	C	A	D	D	A	B	H
32524	A	A	B	A	A	B	H
32525	D	A	D	D	A	C	H
32526	B	B	A	B	B	A	H
32527	C	A	D	C	B	A	U
32529	A	B	A	A	B	A	H
32530	C	C	D	D	C	D	H
32531	D	A	D	D	A	D	H
32532	A	C	A	A	C	A	H
32533	A	A	A	A	A	B	H
32534	B	A	B	B	A	A	H
32535	B	D	A	B	D	A	H
32536	A	D	B	A	D	A	U
32537	C	B	B	C	C	A	H
32539	B	D	B	B	C	A	U
32540	B	C	B	B	C	D	H
32541	D	A	D	D	A	C	H
32542	C	D	B	C	D	D	H
32543	C	A	B	B	A	B	H
32546	D	A	D	D	A	B	U
32547	D	B	B	D	A	B	O
32548	D	A	D	D	A	B	H
32549	A	A	B	B	A	B	H
32550	D	A	D	D	A	C	H
32551	D	A	D	D	A	D	H
32553	C	B	B	C	C	B	H
32554	B	D	A	B	D	A	H
32555	C	B	B	D	B	A	H
32556	A	B	A	A	C	D	U
32557	D	A	D	D	A	C	H
32558	D	A	D	C	A	A	H
32559	C	D	C	C	C	B	O
32560	B	C	D	C	C	B	U
32561	A	D	A	A	D	A	H
32563	D	A	A	B	B	D	U
32564	D	B	B	C	C	B	U
32565	B	B	D	C	C	C	H
32566	B	D	A	B	D	D	H
32568	A	A	A	B	A	D	O
32569	B	B	B	B	B	D	U
32570	C	D	D	C	C	C	H
32571	D	A	D	D	A	C	U
32572	C	B	B	C	A	D	U
32574	D	A	D	D	A	C	H
32575	D	A	B	D	A	A	U
32576	D	A	D	D	A	D	H
32577	C	A	C	B	A	C	U
32578	D	A	B	D	B	A	H
32579	A	C	D	B	C	A	O
32581	C	B	A	A	B	A	H
32582	C	A	D	C	A	D	H
32583	C	A	D	C	A	C	H
32584	D	A	C	D	A	C	H
32587	D	A	A	C	A	D	H
32588	D	A	D	D	A	B	H
32591	C	A	A	D	B	C	H
32592	C	A	A	B	A	A	H
32593	B	B	A	A	A	C	H
32594	D	B	B	C	B	A	H
32595	A	C	B	A	C	A	H
32596	D	A	C	D	A	B	U
32598	C	A	C	B	B	D	H
32599	D	A	A	B	A	D	H
32601	D	D	C	D	D	C	H
32602	A	D	A	A	D	A	H
32603	C	D	B	D	D	D	H
32604	B	C	A	A	C	C	H
32605	B	D	A	A	C	D	H
32606	B	D	A	A	D	A	O
32607	C	C	B	C	C	C	H
32608	A	B	B	B	B	B	H
32609	B	B	D	C	B	C	H
32610	B	C	D	C	C	A	H
32611	C	B	B	B	B	B	U
32612	A	C	A	A	B	A	H
32613	B	D	A	A	D	C	U
32614	B	A	A	B	A	A	H
32615	B	A	D	B	A	B	H
32616	C	B	A	B	B	C	H
32618	C	B	A	B	B	B	U
32619	C	C	A	C	B	C	H
32620	D	A	C	D	B	C	H
32621	B	A	A	B	A	B	H
32622	C	C	D	D	C	B	H
32623	A	C	B	B	C	C	H
32625	A	C	A	A	B	B	H
32626	D	A	C	D	A	A	H
32627	D	A	D	D	A	D	U
32628	C	B	B	C	A	B	H
32629	C	D	D	C	D	D	H
32630	D	A	D	D	B	A	H
32631	D	A	D	D	B	D	H
32632	D	B	D	D	B	A	H
32633	D	C	C	D	C	C	H
32634	D	A	D	D	A	B	H
32635	C	C	A	B	B	C	H
32636	D	B	D	D	C	A	H
32637	D	C	A	D	C	C	H
32638	A	C	A	A	C	C	O
32639	A	C	B	A	C	A	U
32640	D	B	D	D	B	B	U
32641	C	A	B	C	A	C	H
32642	D	A	C	D	A	C	U
32643	C	D	B	C	D	C	O
32644	B	B	A	B	A	D	H
32645	C	A	B	C	A	B	H
32647	B	D	C	B	D	D	H
32648	A	D	A	A	D	D	O
32649	A	A	A	A	B	A	H
32651	D	C	A	D	B	B	H
32652	B	D	A	A	D	D	H
32653	C	D	A	B	D	D	H
32654	A	D	A	A	C	B	H
32655	C	C	B	C	C	D	H
32656	C	D	B	C	C	B	U
32657	B	B	A	A	C	B	H
32658	A	B	A	A	B	D	H
32659	A	B	D	B	B	B	H
32660	B	D	A	B	D	C	H
32662	B	A	C	C	B	C	H
32664	C	A	D	D	A	C	H
32666	A	D	A	A	D	D	H
32667	D	B	C	D	C	A	H
32668	A	B	A	A	C	B	H
32669	C	B	D	D	B	B	H
32670	C	C	A	B	B	D	U
32671	A	B	A	A	B	B	H
32672	B	B	B	A	B	B	H
32675	D	D	C	D	D	B	U
32676	B	A	B	B	B	D	U
32677	A	A	D	A	A	A	H
32678	D	D	C	D	D	B	H
32683	A	D	D	B	D	B	U
32685	B	A	D	B	A	B	H
32686	D	D	B	C	D	C	U
32687	C	A	D	B	A	A	H
32688	C	A	C	C	A	D	H
32689	D	A	D	D	A	B	H
32690	C	B	B	A	B	A	H
32691	D	B	A	C	B	D	H
32692	B	A	B	B	C	C	H
32693	D	B	C	D	C	D	O
32694	B	D	A	A	C	D	H
32695	C	A	D	D	A	A	H
32696	B	C	B	A	B	B	U
32698	C	C	B	C	C	B	H
32699	B	B	A	A	B	D	H
32700	B	D	B	C	D	A	H
32702	D	A	D	D	A	D	U
32703	C	D	B	C	D	D	H
32704	D	A	B	C	A	C	H
32705	A	C	A	B	C	D	U
32706	C	B	A	B	C	C	H
32707	D	B	D	D	B	D	H
32708	B	B	C	C	B	A	H
32710	D	A	D	D	A	D	O
32711	C	A	A	B	B	B	U
32712	A	A	A	A	A	C	H
32713	A	D	A	A	D	C	H
32715	A	B	C	A	B	C	H
32716	D	A	B	C	A	A	U
32717	B	D	B	B	D	B	H
32719	C	D	A	B	C	C	U
32720	D	B	A	C	B	D	H
32721	D	A	D	D	A	A	H
32723	B	D	B	B	D	C	H
32724	C	B	B	B	B	B	H
32725	B	C	D	C	C	B	O
32726	D	C	D	D	C	C	H
32727	D	A	B	D	A	C	H
32728	C	A	B	C	A	C	H
32729	C	A	B	C	A	A	H
32730	D	A	B	D	A	C	H
32731	C	B	C	D	C	B	U
32732	A	C	A	A	C	D	H
32733	C	C	A	A	C	C	O
32735	C	A	B	B	A	C	H
32736	D	A	C	D	A	A	H
32737	B	B	B	B	C	C	H
32738	A	C	A	A	C	A	H
32739	D	C	B	C	C	D	O
32740	B	B	A	C	D	A	H
32741	C	B	A	A	C	C	U
32742	A	D	B	A	D	B	U
32743	C	C	B	C	B	B	U
32744	A	C	B	A	B	C	H
32745	C	A	B	C	A	C	H
32746	B	D	B	B	D	B	O
32747	C	A	B	B	A	C	H
32748	A	D	A	A	D	A	U
32749	A	A	B	B	A	B	U
32750	C	D	A	A	D	D	H
32751	B	A	D	C	A	C	U
32753	D	A	D	D	B	C	H
32754	B	A	D	B	B	B	H
32755	D	A	B	D	A	A	H
32759	C	B	A	C	B	B	H
32760	A	D	A	A	C	B	H
32761	D	A	D	D	A	B	H
32762	D	A	B	D	A	A	H
32764	D	A	D	D	A	B	U
32765	D	A	D	D	A	B	H
32767	D	A	D	D	A	D	O
32768	B	D	A	B	D	C	H
32770	B	B	B	B	B	D	H
32771	D	B	D	D	B	B	H
32773	D	A	C	D	A	D	U
32774	A	C	B	A	C	A	U
32775	B	A	B	B	A	A	H
32776	C	A	D	D	A	C	H
32777	C	B	B	C	B	D	H
32778	D	D	C	D	C	D	H
32780	C	A	B	B	A	B	H
32782	B	A	D	C	B	D	H
32783	B	A	B	B	A	B	H
32784	A	B	B	A	B	A	H
32789	C	B	B	C	B	D	H
32790	B	A	D	C	A	B	H
32791	B	B	B	C	B	A	H
32792	B	B	B	B	B	C	H
32793	C	B	A	C	B	B	O
32794	D	A	C	D	B	B	H
32795	D	A	B	C	A	C	H
32800	D	A	B	C	A	D	U
32802	D	B	D	D	C	A	H
32804	A	D	C	B	D	B	H
32805	C	A	C	B	A	A	H
32806	D	A	D	D	A	B	U
32807	C	B	D	D	C	B	U
32808	C	A	C	D	A	C	U
32809	A	C	A	B	C	B	O
32810	C	B	B	C	B	B	U
32811	C	C	D	D	C	A	H
32812	A	B	B	A	C	B	H
32813	C	C	A	C	C	C	H
32815	A	B	C	A	B	A	H
32817	C	A	D	C	B	D	H
32819	D	C	D	D	C	D	H
32820	A	D	D	B	D	C	H
32821	A	A	B	A	B	A	H
32823	B	C	B	B	C	B	H
32824	D	B	B	C	C	D	H
32825	B	B	D	C	B	A	H
32826	B	D	C	C	D	B	U
32827	C	A	D	D	B	A	H
32829	C	A	A	B	A	D	H
32830	C	A	A	B	A	C	H
32831	C	D	A	B	D	C	H
32832	D	C	B	D	D	C	H
32837	D	B	C	D	B	B	H
32838	A	A	D	A	A	A	H
32839	B	B	D	C	A	D	U
32840	C	C	B	C	C	C	H
32841	A	B	B	A	B	A	U
32843	B	C	A	B	B	A	U
32844	D	B	D	D	B	A	H
32845	B	B	D	C	C	B	U
32846	B	A	B	C	B	C	H
32847	A	A	A	A	B	A	H
32848	A	D	B	A	D	A	H
32850	D	B	B	D	B	A	U
32852	B	A	D	C	A	B	H
32853	C	D	B	C	D	C	H
32854	B	D	D	C	D	B	H
32855	C	B	B	C	A	C	H
32856	D	C	D	D	D	A	H
32857	A	B	D	C	C	A	H
32858	B	A	D	B	B	B	H
32859	A	C	B	A	B	A	H
32860	B	A	B	B	A	C	H
32861	A	B	A	A	B	A	H
32864	A	B	D	C	C	A	H
32865	A	D	B	A	D	D	O
32866	B	D	A	A	D	D	O
32867	B	B	A	B	C	D	H
32868	C	D	A	B	D	D	H
32869	A	A	A	A	A	B	H
32870	D	A	D	D	A	C	H
32871	D	A	A	B	A	D	U
32872	D	D	D	D	D	C	H
32873	C	A	B	C	B	D	H
32874	C	D	C	B	D	D	H
32875	C	C	C	C	C	D	H
32877	D	D	D	D	D	D	H
32878	C	D	D	D	D	D	H
32879	A	D	B	B	D	D	H
32880	A	D	D	A	D	A	H
32881	A	D	A	A	D	C	H
32882	B	C	B	C	B	A	H
32884	C	C	D	D	D	A	U
32885	D	A	D	D	B	C	H
32886	A	A	D	B	A	B	H
32887	A	C	A	A	D	B	U
32888	D	A	D	D	A	A	H
32889	C	A	A	B	A	C	O
32891	C	C	D	D	B	A	H
32892	B	A	B	B	B	B	U
32893	B	D	A	A	D	D	H
32894	D	B	C	D	B	D	H
32895	D	A	C	D	B	A	H
32896	B	C	A	B	C	A	H
32897	A	A	A	A	B	B	H
32898	D	D	B	D	D	D	H
32899	B	D	B	C	D	C	O
32901	B	C	D	C	C	A	H
32902	B	A	D	C	A	A	H
32903	B	C	A	A	C	B	H
32904	C	B	B	C	C	B	H
32905	C	B	C	C	B	D	H
32906	C	B	B	C	B	D	H
32907	B	B	B	B	B	B	H
32908	D	A	C	D	B	D	H
32909	D	A	B	D	A	C	H
32911	C	A	D	D	B	A	O
32912	B	B	A	B	B	B	H
32913	A	D	B	A	D	C	O
32914	B	B	B	B	B	C	H
32915	D	A	B	C	A	C	H
32916	C	B	A	C	C	C	H
32917	C	B	B	C	C	D	H
32918	A	D	D	A	D	A	U
32919	B	A	A	A	B	A	O
32920	D	A	A	D	A	D	H
32922	D	C	A	C	B	D	H
32923	C	B	B	C	B	B	H
32924	A	D	B	A	C	B	H
32925	B	D	B	B	D	A	U
32927	D	C	B	C	C	B	H
32928	A	C	A	A	B	A	H
32929	D	B	A	C	A	B	H
32930	A	B	C	A	B	B	H
32931	C	C	C	C	C	C	H
32932	B	D	D	D	D	A	H
32934	A	B	B	B	C	A	H
32935	A	B	B	A	D	B	H
32937	A	A	D	B	B	A	H
32938	A	A	B	B	A	A	H
32939	C	B	A	A	C	D	O
32940	A	D	B	B	D	C	O
32941	A	B	B	A	C	A	U
32942	D	A	D	D	A	D	H
32943	B	A	B	B	A	C	U
32944	C	D	B	B	D	D	U
32945	A	D	A	A	D	A	H
32946	A	A	C	B	B	D	O
32947	A	B	B	A	C	A	O
32948	A	B	C	B	C	C	H
32949	B	D	B	B	D	D	H
32950	D	A	D	C	A	B	H
32951	D	C	D	D	B	D	U
32952	B	A	B	B	B	B	O
32953	D	A	D	D	A	C	H
32955	A	C	A	B	C	B	H
32957	B	D	A	A	D	C	H
32961	C	C	B	B	C	B	H
32962	A	A	B	A	B	B	H
32964	D	C	D	D	C	A	H
32966	B	A	B	A	A	B	H
32967	A	B	D	A	B	A	U
32968	A	A	C	B	A	B	U
32969	C	C	D	C	C	B	O
32970	C	B	A	B	C	D	H
32971	C	C	A	A	B	B	U
32972	D	A	D	D	A	D	H
32973	C	B	A	C	D	D	U
32974	B	C	C	B	D	A	H
32975	C	C	B	C	C	D	H
32976	A	C	B	B	D	D	O
32977	D	A	B	B	A	B	H
32979	C	C	B	C	C	B	U
32983	D	C	D	D	B	D	H
32985	A	A	D	A	A	A	U
32986	C	D	A	B	D	D	H
32987	C	C	A	B	B	D	U
32989	A	D	A	A	D	A	U
32994	A	C	D	B	C	B	H
32995	A	B	B	A	B	A	H
32996	B	D	D	B	D	A	U
32997	C	C	C	D	B	C	H
32999	D	A	D	D	A	A	H
33000	C	B	A	C	D	C	U
33002	A	A	B	B	B	A	U
33003	A	D	A	A	D	B	H
33005	B	C	B	B	C	A	O
33006	B	C	A	A	C	B	H
33008	C	D	A	B	D	D	O
33009	C	D	A	C	D	C	H
33010	D	A	A	D	B	D	H
33014	A	B	B	B	A	B	H
33015	C	D	D	C	C	A	H
33016	A	A	A	A	A	B	U
33017	C	D	B	B	C	C	H
33018	B	C	A	A	D	B	H
33019	C	A	D	D	A	A	H
33021	A	C	A	A	C	A	U
33022	A	D	A	A	D	C	H
33023	A	C	D	B	C	B	U
33024	D	D	C	D	C	D	U
33025	C	B	A	A	B	D	H
33026	C	C	D	D	C	D	U
33027	C	C	B	C	C	D	H
33030	B	C	D	C	C	B	H
33031	B	D	A	B	D	B	O
33032	C	A	C	C	A	A	U
33034	A	C	D	B	C	B	H
33035	B	B	C	C	B	B	O
33036	C	C	D	D	C	B	O
33037	A	D	A	A	D	D	H
33038	A	C	A	A	C	D	U
33039	A	B	C	A	B	C	H
33040	A	A	B	B	A	D	H
33041	C	D	D	C	D	A	U
33043	A	A	B	A	A	A	O
33044	C	B	A	B	C	B	H
33046	B	A	C	C	A	A	H
33047	C	A	D	D	A	A	H
33048	C	C	B	C	C	B	H
33049	C	A	D	C	A	D	H
33051	B	D	C	C	D	B	H
33054	C	A	D	D	C	B	H
33055	A	A	B	B	B	B	H
33056	B	D	A	A	C	C	H
33057	D	A	B	D	A	D	H
33058	A	A	B	A	A	B	H
33060	B	C	A	B	C	D	H
33061	A	D	A	A	D	B	H
33062	D	A	D	D	A	B	H
33063	D	C	D	D	C	C	H
33064	C	A	B	C	A	A	H
33065	D	C	B	C	B	B	H
33066	D	A	D	D	A	B	U
33068	A	D	B	A	D	C	H
33070	B	D	A	A	D	D	O
33071	C	A	D	C	A	A	H
33072	D	A	B	D	A	C	H
33073	B	D	B	B	D	C	H
33075	A	B	B	B	B	A	H
33076	A	D	A	A	C	A	U
33078	B	C	A	A	C	D	H
33079	A	D	C	A	D	B	H
33081	B	A	B	B	B	A	H
33083	B	B	C	B	C	A	H
33088	C	B	B	C	B	B	U
33090	C	A	B	B	B	B	H
33091	A	B	A	B	B	B	H
33092	A	A	D	A	C	A	U
33094	B	B	B	B	B	C	H
33097	B	A	D	B	B	A	H
33098	A	C	A	A	C	B	H
33099	C	B	A	B	A	A	U
33102	C	B	B	C	B	D	H
33103	A	A	A	A	B	B	H
33105	D	C	C	D	B	A	H
33108	B	C	D	C	C	B	H
33109	D	A	A	C	A	B	U
33111	B	A	B	B	C	B	H
33113	C	A	B	C	B	C	U
33114	B	D	A	A	D	D	H
33116	D	A	D	D	A	B	H
33117	B	C	A	B	C	B	H
33118	C	A	D	D	A	B	H
33119	A	C	B	B	C	B	H
33120	D	A	B	D	A	C	U
33121	A	C	B	A	B	B	H
33122	D	A	D	D	B	D	U
33123	C	A	D	D	A	B	U
33124	C	B	A	A	B	B	H
33126	C	B	A	B	A	C	H
33127	C	A	A	C	B	A	H
33128	A	D	A	A	D	A	U
33131	B	B	B	B	C	C	H
33132	C	C	D	C	C	C	H
33133	C	A	D	D	A	B	H
33135	C	B	A	B	B	D	H
33138	C	C	B	B	C	B	U
33139	A	D	B	B	D	B	H
33141	A	D	B	A	D	C	H
33142	D	A	D	D	A	A	H
33143	B	A	C	B	A	B	H
33144	B	D	B	A	D	D	H
33145	B	C	A	A	C	D	H
33146	D	A	C	D	B	D	O
33147	C	A	C	C	A	D	U
33148	D	A	D	D	A	D	H
33149	B	C	A	A	D	D	H
33150	C	D	B	B	C	B	H
33152	C	B	B	C	B	C	H
33153	A	C	B	A	C	C	H
33154	B	D	B	C	D	B	H
33155	A	D	B	A	D	B	H
33156	A	D	D	A	D	D	H
33157	D	A	D	D	A	D	H
33158	A	A	B	A	A	A	H
33159	C	A	D	D	B	B	H
33160	A	C	B	B	D	B	U
33161	A	C	B	A	C	C	H
33162	C	A	B	C	B	B	H
33163	A	A	A	A	A	B	U
33164	C	B	D	C	C	B	H
33165	D	B	D	D	A	D	H
33167	C	A	D	D	B	C	H
33168	D	A	D	D	A	D	U
33169	C	B	D	C	B	B	H
33172	A	D	A	A	D	C	U
33173	D	A	C	C	A	B	H
33174	C	D	B	C	D	D	O
33175	D	A	B	C	A	D	O
33177	A	D	D	B	D	D	H
33178	B	D	B	C	D	B	H
33179	B	B	B	B	B	B	H
33182	D	A	B	B	A	C	H
33187	C	C	D	C	C	A	H
33188	C	A	C	C	A	D	H
33189	A	B	A	A	B	A	H
33190	D	D	B	C	C	D	U
33191	A	D	B	A	C	A	H
33192	C	C	B	C	B	D	H
33194	C	C	B	B	C	B	O
33195	C	D	D	C	D	C	H
33196	C	D	A	B	C	C	H
33197	B	B	C	C	A	B	H
33198	B	A	A	A	A	B	O
33199	B	B	A	A	B	C	U
33200	D	A	B	D	B	C	U
33201	D	A	D	D	A	C	H
33202	D	C	D	D	B	D	H
33203	C	A	D	B	A	A	U
33204	C	B	C	C	B	D	H
33205	C	B	B	D	B	B	H
33207	C	C	B	C	C	C	H
33208	C	A	B	C	B	A	H
33209	C	B	A	B	C	C	H
33210	B	C	D	B	C	A	H
33211	B	B	C	C	C	B	U
33212	B	C	B	C	C	C	H
33213	D	A	D	D	A	A	H
33217	A	A	D	A	B	A	H
33218	C	B	A	C	B	B	H
33219	A	D	C	A	D	A	H
33220	A	B	B	A	B	A	H
33221	D	A	D	D	A	C	H
33222	A	D	A	B	D	D	H
33224	D	C	A	D	C	B	H
33228	A	D	C	B	D	B	H
33229	A	C	A	A	C	B	H
33230	C	A	B	C	B	A	H
33232	B	A	D	C	B	A	U
33234	B	C	B	C	C	D	H
33236	D	A	B	C	A	C	H
33237	D	A	C	D	B	B	H
33240	A	C	D	C	C	A	U
33242	D	C	B	D	C	C	U
33243	C	D	D	D	D	A	H
33244	B	C	C	D	C	D	H
33246	B	D	A	A	C	C	H
33249	B	D	A	B	D	C	H
33251	B	D	A	A	D	C	H
33252	C	B	A	C	A	D	H
33253	A	B	B	A	C	B	H
33254	B	A	C	B	B	C	H
33255	C	C	A	C	B	C	H
33256	C	A	D	D	A	B	H
33257	B	A	B	C	B	B	H
33258	C	A	D	C	A	B	H
33259	A	D	B	A	C	B	U
33260	A	D	B	A	D	B	H
33261	B	B	D	C	B	A	H
33262	C	B	A	C	B	B	H
33263	D	C	A	C	C	C	U
33265	B	A	D	B	A	A	U
33266	B	C	A	A	C	A	H
33269	B	B	B	C	C	A	H
33270	A	A	C	B	A	B	H
33271	D	C	C	D	B	D	O
33275	C	A	D	D	A	B	U
33276	B	A	A	B	A	A	U
33277	D	A	B	D	A	C	H
33278	C	C	A	C	D	D	U
33279	D	C	B	C	C	D	H
33280	D	B	D	D	B	D	H
33281	D	C	A	C	C	B	O
33282	C	A	D	D	A	B	H
33285	C	D	D	C	D	C	H
33288	A	D	D	C	D	A	H
33289	A	D	B	B	D	A	H
33290	B	A	B	B	B	A	O
33292	A	B	B	B	C	A	H
33293	A	D	B	A	D	D	H
33295	D	A	B	B	A	C	H
33296	B	B	D	C	C	A	H
33297	A	C	C	A	C	B	H
33298	A	A	B	A	A	A	U
33299	D	A	B	C	A	D	H
33300	B	D	B	B	D	D	H
33301	C	A	C	B	A	C	H
33302	C	A	C	C	A	C	H
33304	C	D	B	C	C	B	H
33305	B	A	A	B	B	D	H
33306	B	D	C	C	D	A	H
33307	B	D	A	A	D	C	H
33308	A	A	B	A	A	B	U
33309	C	B	B	C	C	B	U
33310	A	B	B	B	C	A	U
33311	C	A	B	C	A	D	H
33312	D	B	A	C	B	D	H
33314	B	B	D	B	C	C	H
33316	C	B	D	C	B	B	H
33317	A	A	B	B	A	B	H
33318	A	C	B	A	C	A	H
33319	A	B	A	B	C	C	H
33320	B	D	A	A	D	C	H
33321	B	B	D	C	B	B	H
33322	D	A	B	C	A	D	O
33323	C	A	B	C	A	B	O
33324	A	D	A	A	D	A	H
33325	A	D	D	B	C	A	H
33326	C	B	C	C	C	B	H
33327	A	C	B	B	C	C	H
33328	A	B	B	B	C	C	H
33330	B	C	D	C	C	C	H
33332	B	C	C	B	C	C	H
33334	A	A	D	A	A	B	H
33335	D	C	C	D	C	D	U
33336	B	D	A	A	D	C	H
33338	A	B	B	A	B	B	H
33339	A	D	C	A	C	D	H
33340	A	B	D	A	B	B	H
33341	D	D	C	D	C	B	H
33343	C	D	B	C	D	B	H
33344	C	C	B	C	D	B	H
33345	B	D	B	B	D	C	H
33346	C	C	A	B	C	B	H
33347	D	A	D	D	A	D	H
33348	A	D	A	A	D	C	U
33349	D	A	C	D	C	C	H
33350	A	D	A	A	D	D	H
33352	A	C	C	A	C	C	H
33353	A	C	D	B	C	A	H
33354	A	D	B	B	C	A	H
33355	C	B	D	D	C	B	H
33356	A	D	A	A	D	A	H
33357	A	D	C	B	D	C	H
33358	C	C	D	C	C	A	U
33361	A	B	B	A	B	B	H
33362	D	B	D	D	C	B	U
33364	A	B	B	A	B	A	H
33367	C	C	A	A	C	D	U
33368	C	C	B	D	C	D	H
33369	A	B	D	A	B	B	H
33370	D	C	B	D	B	C	H
33371	A	C	C	A	C	A	H
33373	B	C	A	A	C	B	H
33375	C	C	C	D	C	D	H
33377	A	B	D	A	C	D	H
33378	B	A	C	B	A	C	H
33379	C	D	A	B	D	B	H
33380	A	C	D	A	C	A	H
33381	A	D	A	A	C	D	H
33382	D	A	B	D	A	C	H
33385	A	D	A	A	D	B	H
33386	A	D	C	A	D	A	U
33387	C	B	A	B	A	B	H
33388	C	D	A	A	D	D	H
33390	A	C	A	A	C	A	H
33391	C	B	C	C	B	C	H
33394	C	D	A	B	D	D	U
33396	A	B	B	B	C	A	H
33397	B	B	A	B	C	D	U
33398	B	C	A	A	C	B	H
33399	C	B	B	D	C	D	H
33400	B	D	A	B	D	D	U
33401	D	A	D	D	A	D	H
33402	B	C	B	B	C	B	H
33403	B	A	A	B	A	B	H
33404	B	C	B	A	D	A	H
33407	B	A	B	B	A	A	H
33408	B	A	D	B	B	A	H
33410	B	D	B	C	C	A	H
33411	C	C	B	C	D	C	H
33412	B	A	C	C	A	D	H
33413	D	A	B	C	A	B	H
33414	B	A	C	B	A	B	U
33415	B	B	D	B	B	B	H
33416	A	C	D	B	C	D	H
33417	A	A	B	A	A	A	U
33418	D	A	C	D	A	C	H
33420	B	C	A	B	D	A	H
33421	B	D	B	A	D	D	O
33422	C	B	A	B	A	C	H
33423	A	B	B	B	C	B	H
33424	D	B	D	D	A	B	H
33426	B	B	B	B	B	D	H
33427	B	B	D	D	C	C	H
33428	A	D	D	A	D	A	H
33429	D	A	B	D	A	D	H
33430	D	B	C	C	B	B	H
33431	D	C	B	D	B	B	U
33432	D	C	D	D	B	C	H
33433	A	A	D	C	A	A	H
33434	D	D	C	D	D	B	U
33436	D	B	D	D	B	C	H
33437	A	C	B	A	C	A	H
33438	D	A	B	D	A	C	H
33439	A	C	A	A	C	A	H
33440	D	A	B	D	A	C	O
33442	B	A	D	D	B	B	U
33444	B	C	D	C	C	D	H
33445	D	A	D	D	C	B	H
33446	C	C	C	C	C	D	H
33448	B	C	A	B	D	D	H
33451	B	D	A	B	D	D	O
33452	A	D	B	B	D	C	H
33453	D	A	D	D	A	C	H
33455	B	B	B	B	B	C	H
33457	D	A	C	D	C	A	U
33458	B	B	B	C	C	D	H
33459	B	B	A	A	B	B	H
33460	D	B	C	C	A	B	H
33461	C	A	C	C	A	B	U
33462	C	D	D	D	D	A	O
33463	D	A	C	D	A	D	H
33464	D	B	D	D	A	B	H
33465	A	D	D	B	D	D	H
33466	C	D	A	B	D	B	H
33467	C	A	B	B	A	C	U
33468	B	B	B	C	C	C	H
33469	B	B	D	C	B	A	H
33471	A	D	A	A	D	D	H
33472	A	B	B	A	B	A	H
33474	D	A	B	D	A	D	U
33476	D	A	C	D	A	C	U
33477	B	B	B	B	C	B	H
33478	A	D	A	A	D	B	H
33479	D	C	B	D	C	D	H
33480	A	B	C	B	D	B	H
33481	B	C	B	B	C	C	H
33482	B	B	A	A	C	A	O
33483	A	A	C	B	C	B	H
33484	D	A	B	C	A	C	H
33485	C	A	C	D	A	B	U
33486	C	D	B	D	D	A	H
33487	D	C	C	D	C	B	H
33488	B	A	A	A	A	D	H
33489	B	B	B	B	A	B	H
33490	D	A	C	D	A	D	U
33491	C	B	C	C	C	C	H
33492	B	D	C	B	D	A	H
33493	B	A	C	A	A	D	H
33494	D	A	D	D	A	B	O
33495	D	A	C	D	A	B	H
33496	B	C	B	C	C	D	O
33497	A	B	B	A	B	A	U
33498	A	C	B	B	D	A	U
33499	C	D	D	D	C	A	H
33501	C	A	A	B	A	D	U
33502	A	B	A	A	B	B	H
33505	B	A	C	C	A	B	U
33506	C	C	B	C	C	D	H
33507	A	D	C	A	C	B	H
33508	D	B	B	D	A	C	H
33509	C	A	D	C	B	B	H
33510	D	D	D	D	D	C	H
33511	D	C	B	D	B	C	H
33512	C	C	D	D	C	A	H
33513	A	B	D	A	B	A	U
33514	C	A	C	C	B	B	H
33516	D	A	B	D	A	A	H
33517	B	D	A	A	D	C	H
33518	D	D	D	D	D	D	H
33519	C	A	B	C	B	A	U
33520	B	A	A	B	A	C	O
33521	B	D	B	B	C	A	H
33522	C	A	B	C	B	B	U
33523	C	A	B	B	A	A	H
33524	D	A	D	D	A	A	H
33525	C	C	B	C	C	B	O
33526	D	B	D	D	B	A	H
33528	B	B	B	A	C	B	U
33529	A	C	A	A	C	B	H
33530	B	A	D	C	A	A	H
33531	D	A	D	D	A	D	H
33532	B	B	C	C	C	B	U
33534	C	C	D	D	D	B	H
33535	A	A	B	A	A	A	H
33536	C	D	B	C	D	C	H
33539	B	D	D	B	D	C	H
33540	A	A	D	B	B	A	H
33541	B	D	A	A	D	D	H
33542	B	D	A	A	D	B	H
33543	D	A	C	D	A	A	H
33544	B	A	C	C	A	B	U
33545	D	A	D	D	A	B	H
33546	D	C	D	D	C	D	H
33547	C	A	C	D	A	B	U
33549	C	A	C	C	B	B	O
33550	A	A	D	A	A	A	H
33552	C	C	B	A	C	C	U
33553	B	D	A	A	D	C	H
33554	A	B	A	A	B	B	H
33555	D	A	C	D	A	C	U
33556	D	A	B	C	A	D	H
33557	C	B	B	C	C	B	O
33558	A	D	A	B	B	A	H
33559	B	A	B	B	A	D	H
33560	C	A	D	C	A	B	H
33562	B	A	D	C	A	B	H
33563	B	D	A	A	C	C	O
33564	D	A	B	D	A	C	H
33565	D	C	B	D	C	B	H
33566	A	D	C	A	D	A	H
33567	B	B	B	B	C	A	H
33568	A	A	B	A	B	B	H
33569	A	A	B	B	A	C	U
33570	B	C	A	A	C	A	H
33571	A	D	A	A	C	A	O
33572	A	A	B	A	B	B	H
33573	A	A	A	A	B	B	U
33575	B	B	B	B	B	B	U
33576	B	A	D	C	A	A	H
33577	C	C	B	C	C	B	H
33580	B	B	A	A	B	B	H
33582	A	A	A	A	B	B	H
33583	C	B	B	C	B	C	U
33584	C	D	A	C	D	B	U
33585	A	D	A	A	D	B	H
33586	C	C	D	D	C	C	H
33587	B	D	A	B	D	D	H
33588	D	C	D	D	B	D	H
33589	B	D	A	A	D	A	O
33590	D	B	A	C	C	D	H
33591	B	C	A	B	C	B	H
33593	B	B	B	B	C	A	H
33595	B	A	D	D	A	A	H
33597	B	B	D	B	C	B	H
33598	A	D	A	A	D	B	H
33601	D	D	D	D	D	D	H
33602	A	D	B	A	D	A	H
33603	A	B	D	C	C	B	H
33604	B	D	B	A	C	A	H
33605	D	C	B	C	D	D	H
33606	B	B	B	B	C	B	H
33607	B	A	D	B	A	B	H
33608	C	A	C	C	A	C	H
33609	A	C	C	A	C	A	H
33614	A	A	C	B	B	B	H
33615	B	D	D	C	D	B	H
33616	C	D	A	B	D	D	H
33617	C	C	B	B	C	A	O
33620	C	B	A	B	B	D	H
33621	D	B	D	D	B	B	H
33622	A	B	B	A	C	B	H
33623	D	A	C	C	A	B	H
33624	D	A	D	D	A	D	U
33625	A	D	A	A	D	C	U
33626	C	B	D	D	B	C	H
33627	B	A	B	B	B	B	H
33628	D	A	B	D	A	C	H
33629	A	A	C	A	A	A	H
33630	D	A	D	D	A	B	H
33631	A	B	A	A	A	B	U
33632	C	D	B	C	D	B	H
33634	C	B	B	D	B	B	H
33636	A	D	A	B	D	D	H
33637	B	C	B	B	C	B	H
33638	A	D	B	A	D	C	H
33639	C	A	B	C	B	D	H
33640	A	C	A	A	B	B	U
33641	B	D	A	B	D	D	H
33642	C	B	D	D	B	B	U
33643	C	D	C	D	C	C	H
33646	C	B	D	D	B	B	U
33647	D	A	D	D	A	D	O
33648	B	B	B	B	B	B	H
33649	D	A	D	D	A	C	U
33651	D	A	D	D	A	B	H
33652	C	C	A	B	C	C	U
33653	B	D	B	B	D	B	O
33654	C	D	D	D	D	C	H
33655	B	A	D	C	A	B	H
33656	C	B	D	C	B	A	H
33658	C	A	D	B	A	C	H
33659	A	B	A	A	B	C	H
33660	B	A	A	A	A	C	H
33663	D	A	D	D	A	B	H
33664	B	A	D	C	B	B	H
33665	A	B	D	B	B	B	O
33666	A	A	D	B	A	B	H
33667	D	A	C	D	A	C	H
33668	A	C	C	A	D	D	H
33669	C	D	A	B	D	C	H
33670	A	B	A	A	B	A	H
33671	A	A	A	A	A	A	U
33672	A	B	C	B	A	D	H
33673	C	B	A	B	B	C	H
33674	B	A	B	C	A	B	H
33676	C	B	B	C	B	B	H
33677	C	B	C	C	A	D	O
33678	B	D	D	C	D	B	H
33679	C	C	B	C	C	D	O
33680	A	B	C	A	B	B	H
33681	A	B	C	B	B	A	H
33683	C	A	B	B	A	B	H
33684	C	B	A	C	A	D	U
33685	C	D	A	A	D	C	O
33686	C	C	B	C	C	D	H
33687	C	C	A	A	C	D	H
33688	B	B	A	B	B	C	H
33689	B	C	A	B	C	D	H
33692	B	D	B	B	D	B	H
33693	B	D	B	B	D	A	H
33694	B	A	C	C	A	B	H
33695	B	D	B	B	D	D	H
33696	B	B	D	C	B	C	H
33698	A	D	C	A	D	C	O
33699	A	A	D	B	A	B	H
33701	C	B	D	C	B	A	U
33703	D	A	B	B	A	B	H
33704	A	D	C	B	D	C	H
33705	A	D	B	B	D	D	O
33706	A	B	A	A	B	A	U
33707	C	B	A	C	B	C	H
33708	B	D	C	C	D	C	H
33709	B	A	B	C	B	A	H
33710	C	A	B	D	B	D	H
33711	D	A	C	D	A	B	H
33712	D	D	B	D	D	B	H
33713	C	C	B	B	D	C	H
33714	A	D	B	A	D	B	H
33715	A	D	B	A	D	A	H
33716	A	A	C	B	A	A	U
33717	D	B	B	C	B	C	H
33718	C	D	D	C	D	C	H
33719	D	B	D	D	A	C	H
33720	D	B	B	C	B	C	H
33721	A	A	D	C	B	B	H
33722	A	D	B	A	D	B	H
33723	B	B	B	B	C	B	H
33724	A	C	A	A	D	B	H
33725	A	D	A	A	D	C	U
33726	B	A	C	B	A	A	H
33727	A	D	B	A	C	C	H
33728	A	A	B	B	B	A	H
33729	A	A	B	A	C	B	H
33730	B	D	A	A	D	C	H
33731	C	B	B	C	B	D	H
33732	D	D	B	D	D	D	H
33733	B	D	A	A	D	C	H
33734	B	B	D	C	B	B	H
33735	C	D	B	C	D	A	H
33737	A	D	B	A	D	A	H
33739	B	A	A	A	A	D	U
33740	A	B	C	A	B	A	H
33742	A	D	A	A	D	D	H
33743	D	A	B	D	A	B	H
33744	B	C	B	B	C	B	H
33745	B	D	A	A	D	D	H
33746	C	D	B	C	D	B	H
33748	B	D	B	B	C	C	H
33750	C	A	B	C	A	C	H
33751	C	A	D	C	B	D	H
33753	C	B	B	B	B	A	H
33754	D	A	B	C	B	A	U
33755	A	A	D	A	B	B	U
33756	D	C	B	D	B	D	H
33758	B	C	A	A	C	C	H
33759	B	D	A	A	D	D	H
33760	C	D	B	C	C	D	H
33761	A	B	A	A	B	B	H
33762	B	D	B	C	C	B	H
33763	D	A	A	C	A	C	U
33764	C	D	A	B	D	D	O
33765	A	D	A	A	D	C	H
33767	C	D	D	D	D	D	H
33768	C	D	B	C	D	D	H
33770	C	B	A	A	B	C	O
33771	C	A	A	B	A	D	H
33772	D	A	D	D	A	D	H
33773	C	C	D	C	C	C	H
33774	B	C	A	A	B	A	H
33775	B	B	A	A	B	C	O
33776	D	D	A	B	D	D	U
33777	B	D	D	B	C	A	H
33780	B	B	B	A	C	D	H
33781	D	A	D	D	A	C	U
33782	C	C	A	B	B	C	H
33783	C	A	A	C	B	D	O
33784	A	A	A	A	A	B	H
33785	B	B	A	B	C	D	H
33786	A	D	A	A	D	C	H
33787	C	B	D	C	C	B	H
33788	D	A	C	D	A	C	H
33789	B	D	B	C	D	A	H
33790	A	C	B	A	C	A	U
33791	B	A	A	A	A	A	H
33792	D	A	B	B	A	B	H
33793	A	C	C	A	C	B	H
33794	D	D	A	C	C	D	H
33795	A	B	B	B	B	A	H
33798	A	B	A	A	B	A	H
33799	D	D	A	B	D	D	H
33801	C	A	B	B	B	B	O
33802	C	B	D	D	B	B	H
33803	A	B	C	A	B	C	H
33804	D	B	B	D	C	D	H
33805	A	C	A	A	C	B	H
33806	A	A	D	A	A	A	H
33807	A	B	A	A	C	B	H
33808	A	B	C	B	C	A	H
33809	A	D	A	A	D	D	H
33810	C	A	D	D	A	A	H
33811	D	B	A	D	B	C	H
33812	B	C	B	B	C	C	H
33813	B	B	B	B	B	C	H
33814	D	C	A	C	C	D	H
33815	A	D	A	A	D	D	H
33816	A	C	B	C	C	A	H
33817	A	C	B	B	D	D	H
33818	D	D	D	C	D	D	H
33819	C	A	C	C	A	A	H
33820	A	B	B	A	B	A	H
33821	C	C	D	D	C	B	H
33822	B	D	A	A	C	B	O
33823	A	B	B	A	B	A	H
33824	A	B	A	A	B	A	O
33825	D	B	D	D	B	D	H
33826	D	B	B	D	B	C	H
33829	B	C	A	B	C	D	H
33830	C	A	A	B	A	B	H
33833	C	B	B	B	B	D	H
33834	A	B	A	A	B	B	H
33835	D	C	C	D	C	D	O
33837	B	C	A	B	C	D	H
33838	A	D	A	A	D	B	H
33839	D	C	D	D	B	B	H
33841	C	C	C	D	C	A	H
33842	C	D	B	B	D	D	U
33843	B	D	A	A	D	D	O
33844	C	D	B	C	D	D	H
33846	A	C	D	B	C	C	U
33847	C	D	B	D	D	A	H
33848	B	A	A	A	A	A	H
33849	C	A	D	C	A	C	H
33852	B	A	A	B	A	A	U
33853	B	D	A	B	D	B	H
33854	C	C	D	C	C	B	H
33855	A	C	A	A	C	B	H
33856	C	B	C	D	B	B	H
33857	A	A	A	A	B	A	U
33858	A	D	A	A	D	B	H
33859	B	C	B	B	C	A	U
33860	B	A	B	A	B	C	H
33861	B	D	A	A	D	D	H
33862	C	B	A	B	B	D	H
33863	D	B	B	D	C	C	H
33864	C	C	B	D	C	D	O
33865	B	D	C	C	D	A	H
33866	B	B	B	C	B	D	U
33867	D	D	B	D	D	D	H
33868	C	A	C	C	B	B	H
33869	B	C	A	A	C	B	H
33870	A	D	D	A	D	A	H
33871	B	D	A	A	C	B	H
33872	C	B	B	C	B	C	H
33873	B	D	A	B	C	B	H
33874	A	B	B	A	C	A	H
33875	A	C	A	A	C	B	H
33876	C	D	A	B	D	C	H
33877	C	D	A	A	D	C	H
33878	B	A	B	C	B	D	O
33879	A	B	A	A	B	A	H
33881	D	A	D	D	B	A	H
33882	A	C	A	A	C	A	H
33883	D	A	A	B	B	A	H
33884	A	C	B	B	C	C	U
33885	A	D	A	A	D	C	H
33886	D	A	B	C	A	C	H
33887	C	B	C	B	B	D	H
33888	A	D	A	A	D	A	U
33889	C	B	A	B	B	B	U
33890	A	C	A	A	C	A	H
33891	C	C	B	B	C	B	H
33892	B	B	A	A	C	C	H
33893	B	D	B	B	D	D	H
33894	B	D	A	A	C	B	H
33895	D	B	B	C	B	D	H
33896	C	C	B	C	B	B	H
33897	C	C	B	D	B	B	H
33898	B	D	B	B	D	C	O
33900	B	B	B	C	C	B	U
33901	D	A	D	D	A	C	H
33902	A	B	A	A	B	A	U
34854	B	A	A	B	B	C	H
34855	C	C	A	C	D	C	H
34856	B	A	B	B	C	B	H
34857	A	C	A	A	B	C	H
34859	C	B	C	C	B	B	H
34861	A	A	B	B	B	D	H
34862	D	A	A	C	A	D	H
34863	D	A	B	D	A	D	H
34864	D	A	B	C	A	A	U
34865	A	D	B	B	D	D	H
34866	D	D	B	D	D	C	U
34867	B	C	D	B	D	D	O
34868	D	C	D	D	C	C	H
34870	A	A	A	A	B	C	H
34872	B	B	A	A	C	A	H
34873	C	B	C	C	B	A	H
34874	B	A	B	B	A	A	H
34875	C	A	A	C	A	D	H
34876	D	A	A	D	A	B	H
34877	A	C	B	A	C	A	H
34878	C	A	B	C	B	B	H
34879	B	D	B	C	D	D	U
34880	A	B	B	A	C	B	H
34881	B	B	D	C	B	A	H
34882	B	D	A	B	C	D	H
34883	B	D	A	B	D	D	H
34884	A	A	A	A	A	B	O
34885	C	D	B	C	D	B	H
34886	A	C	A	A	B	A	H
34887	C	B	B	C	B	A	H
34888	D	D	A	D	D	A	H
34889	B	D	B	B	C	B	U
34890	C	D	A	B	D	D	H
34891	A	C	B	A	B	B	U
34892	A	D	A	A	D	C	H
34893	A	A	C	A	A	A	H
34894	C	B	A	A	B	A	H
34895	B	D	A	B	D	B	H
34896	B	B	A	B	B	B	H
34897	D	B	B	C	A	C	H
34898	A	A	A	A	A	A	U
34899	A	B	C	A	C	D	H
34900	A	B	B	A	B	C	H
34901	A	C	C	A	C	A	H
34903	C	A	B	C	A	D	U
34904	C	B	D	B	B	C	U
34906	C	D	A	B	D	D	O
34907	D	A	A	C	B	D	H
34908	A	D	B	A	D	D	H
34909	D	B	D	C	B	D	H
34910	B	A	A	A	A	C	H
34912	B	C	D	C	B	A	U
34913	C	D	B	B	D	C	H
34914	B	B	D	B	B	B	U
34915	A	D	D	A	C	A	U
34917	D	B	B	D	B	B	U
34918	C	A	A	A	B	B	H
34919	D	D	B	C	D	A	H
34921	B	D	A	B	D	D	U
34922	C	A	B	D	B	B	H
34923	C	A	A	C	A	C	H
34924	B	C	A	A	C	C	H
34925	B	C	D	C	C	B	H
34926	B	D	A	A	D	C	H
34927	C	A	B	C	B	B	H
34928	A	A	A	A	A	C	H
34929	C	C	B	D	B	B	H
34930	D	A	B	D	A	C	H
34931	A	D	B	A	D	D	H
34932	C	D	B	D	D	C	H
34934	D	B	B	D	B	C	H
34935	A	B	D	B	B	B	H
34936	D	D	B	C	D	A	H
[truncated: 304 more rows]

## Sheet: Data_article
VoterID	D_AUI	D_AUN	D_AUT	AUTV	AUTN	PERM	BCS
29501	70.8333	21.875	66.6667	68.3333	20.8333	25	5
29502	79.1667	9.375	100	88.3333	6.25	10	4
29503	75	9.375	83.3333	86.6667	10.4167	45	5
29504	66.6667	0	75	65	0	25	5
29507	83.3333	18.75	87.5	85	16.6667	45	5
29508	75	12.5	70	75	12.5	20	5
29510	79.1667	18.75	87.5	86.6667	25	25	3
29513	58.3333	50	62.5	70	47.9167	20	5
29514	91.6667	18.75	100	96.6667	18.75	20	3
29515	83.3333	18.75	83.3333	80	18.75	55	5
29519	80	43.75	54.1667	67.8571	45.8333	20	4
29520	62.5	15.625	91.6667	76.6667	22.9167	25	4
29521	58.3333	3.125	100	76.6667	12.5	20	5
29522	25	56.25	79.1667	56.6667	45.8333	10	4
29523	15	21.4286	95	51.9231	22.7273	20	4
29524	54.1667	50	87.5	70	45.8333	30	4
29526	58.3333	50	87.5	78.3333	41.6667	25	5
29527	70.8333	31.25	66.6667	73.3333	27.0833	40	5
29529	37.5	31.25	79.1667	63.3333	27.0833	10	5
29531	50	25	70.8333	65	31.25	45	5
29533	54.1667	25	66.6667	61.6667	27.0833	30	5
29534	62.5	15.625	95.8333	81.6667	18.75	15	4
29535	70.8333	15.625	70.8333	70	16.6667	35	4
29537	54.1667	21.875	75	68.3333	18.75	30	5
29538	37.5	28.125	66.6667	58.3333	27.0833	10	5
29540	83.3333	34.375	58.3333	75	27.0833	15	5
29541	50	21.875	79.1667	70	33.3333	40	5
29545	70.8333	21.875	83.3333	83.3333	20.8333	20	4
29546	8.33333	0	95.8333	61.6667	8.33333	30	5
29547	41.6667	15.625	79.1667	63.3333	16.6667	10	5
29548	70.8333	28.125	58.3333	61.6667	33.3333	35	5
29549	62.5	12.5	83.3333	71.6667	14.5833	25	4
29552	79.1667	15.625	75	70	14.5833	35	5
29553	66.6667	12.5	75	66.6667	18.75	5	2
29556	58.3333	15.625	62.5	65	29.1667	35	5
29557	87.5	12.5	87.5	85	18.75	40	4
29558	75	34.375	66.6667	75	31.25	50	3
29559	66.6667	15.625	54.1667	75	14.5833	25	5
29560	33.3333	28.125	75	56.6667	33.3333	5	3
29563	54.1667	6.25	87.5	75	10.4167	30	5
29565	62.5	18.75	60	66.0714	16.6667	45	5
29566	66.6667	6.25	70.8333	75	8.33333	5	3
29567	58.3333	40.625	91.6667	71.6667	35.4167	10	5
29568	62.5	34.375	87.5	78.3333	31.25	15	3
29569	37.5	9.375	100	65	18.75	10	5
29570	54.1667	43.75	87.5	73.3333	35.4167	20	4
29573	41.6667	40.625	62.5	58.3333	43.75	35	4
29574	41.6667	25	100	76.6667	25	10	3
29575	16.6667	25	79.1667	53.3333	27.0833	30	3
29577	54.1667	12.5	70.8333	66.6667	18.75	30	4
29578	79.1667	21.875	70.8333	73.3333	18.75	30	5
29579	62.5	25	54.1667	61.6667	22.7273	15	3
29580	16.6667	6.25	91.6667	53.3333	18.75	0	5
29582	33.3333	28.125	75	51.6667	31.25	5	5
29583	37.5	6.25	83.3333	61.6667	16.6667	30	3
29584	54.1667	40.625	87.5	75	33.3333	15	5
29585	45.8333	43.75	54.1667	56.6667	47.9167	35	5
29586	58.3333	18.75	87.5	75	16.6667	25	3
29588	91.6667	3.125	95.8333	93.3333	6.25	35	5
29589	33.3333	6.25	100	71.6667	16.6667	10	5
29590	50	21.875	75	65	31.25	20	5
29593	54.1667	21.875	83.3333	68.3333	22.9167	5	4
29594	54.1667	9.375	95.8333	73.3333	12.5	20	5
29595	37.5	9.375	54.1667	51.6667	18.75	20	3
29596	75	6.25	87.5	81.6667	10.4167	25	5
29599	58.3333	10.7143	95.8333	78.3333	13.6364	5	5
29602	8.33333	25	83.3333	45	25	10	5
29603	50	37.5	75	68.3333	33.3333	70	5
29604	75	28.125	87.5	81.6667	31.25	25	5
29605	58.3333	25	100	78.3333	27.0833	5	4
29610	70.8333	9.375	87.5	76.6667	10.4167	30	5
29612	79.1667	46.875	75	75	37.5	25	5
29613	66.6667	28.125	70	71.4286	27.0833	25	3
29616	70.8333	25	100	81.6667	29.1667	5	5
29617	91.6667	6.25	79.1667	81.6667	8.33333	45	3
29618	41.6667	34.375	100	75	33.3333	20	5
29620	45.8333	25	83.3333	66.6667	22.9167	25	5
29621	83.3333	9.375	75	80	12.5	20	4
29623	62.5	28.125	91.6667	81.6667	33.3333	45	3
29624	20.8333	34.375	70.8333	50	36.3636	20	4
29625	50	9.375	79.1667	63.3333	20.8333	30	5
29626	33.3333	18.75	95.8333	66.6667	29.1667	35	3
29629	20.8333	56.25	83.3333	53.3333	58.3333	30	4
29637	45.8333	15.625	95.8333	71.6667	31.25	15	2
29638	50	18.75	66.6667	70	20.8333	10	5
29639	37.5	25	58.3333	51.6667	37.5	30	4
29640	45.8333	37.5	87.5	68.3333	47.9167	10	4
29641	58.3333	15.625	91.6667	73.3333	20.8333	25	5
29642	75	0	100	88.3333	10.4167	30	5
29643	83.3333	31.25	75	87.5	39.5833	40	4
29644	66.6667	3.125	100	83.3333	12.5	15	5
29645	66.6667	12.5	75	75	18.75	50	5
29647	66.6667	46.875	70.8333	71.6667	47.9167	45	5
29648	54.1667	18.75	87.5	70	27.0833	15	6
29650	70.8333	65.625	58.3333	71.6667	56.25	35	5
29655	62.5	34.375	87.5	76.6667	35.4167	45	3
29658	62.5	0	66.6667	66.6667	4.16667	20	4
29659	25	46.875	79.1667	58.3333	52.0833	35	4
29660	62.5	53.125	75	75	50	40	5
29661	54.1667	15.625	79.1667	71.4286	16.6667	35	5
29662	62.5	31.25	75	66.0714	31.25	40	4
29664	50	56.25	37.5	45	50	50	3
29665	50	65.625	79.1667	68.3333	60.4167	45	5
29669	16.6667	12.5	100	56.6667	16.6667	0	3
29670	66.6667	31.25	91.6667	78.3333	31.25	20	4
29671	70.8333	9.375	95.8333	85	14.5833	40	5
29673	62.5	31.25	62.5	61.6667	31.25	50	4
29675	37.5	50	75	60	50	30	5
29676	58.3333	31.25	58.3333	65	35.4167	35	3
29677	70.8333	21.875	79.1667	73.3333	18.75	15	3
29678	45.8333	9.375	75	61.6667	18.75	15	5
29679	45.8333	25	87.5	68.3333	25	50	3
29680	83.3333	15.625	100	85	20.8333	0	4
29681	37.5	28.125	83.3333	56.6667	27.0833	20	5
29684	45.8333	21.875	83.3333	62.5	20.8333	10	3
29685	20.8333	34.375	75	56.6667	35.4167	30	3
29686	66.6667	18.75	91.6667	85	25	10	5
29687	50	34.375	87.5	71.6667	31.25	15	5
29691	62.5	21.875	70.8333	70	16.6667	45	4
29692	83.3333	3.125	83.3333	83.3333	8.33333	35	3
29693	60	31.25	95.8333	85.7143	33.3333	60	5
29694	83.3333	28.5714	100	93.3333	25	10	3
29695	58.3333	0	54.1667	61.6667	0	30	8
29696	66.6667	15.625	79.1667	71.6667	16.6667	25	5
29698	45.8333	9.375	66.6667	61.6667	14.5833	0	4
29699	62.5	15.625	95.8333	80	27.0833	20	4
29700	45	50	95.8333	67.8571	43.75	25	3
29703	66.6667	6.25	91.6667	80	6.25	20	3
29704	75	28.125	70.8333	76.6667	33.3333	50	5
29705	37.5	43.75	70	57.1429	33.3333	5	5
29707	66.6667	21.875	66.6667	71.6667	31.25	40	1
29712	100	3.125	100	90	2.08333	60	5
29715	79.1667	6.25	100	88.3333	12.5	45	5
29717	41.6667	46.875	58.3333	50	41.6667	45	5
29718	29.1667	21.875	87.5	61.6667	22.9167	10	5
29719	37.5	9.375	66.6667	61.6667	16.6667	25	5
29721	91.6667	0	95.8333	90	8.33333	35	5
29722	58.3333	18.75	91.6667	73.3333	22.9167	20	3
29723	58.3333	12.5	83.3333	76.6667	14.5833	55	6
29724	70.8333	9.375	62.5	66.6667	8.33333	30	5
29725	50	18.75	87.5	76.6667	29.1667	30	3
29726	50	9.375	79.1667	58.3333	12.5	30	7
29727	83.3333	3.125	91.6667	86.6667	4.16667	25	4
29728	54.1667	28.125	62.5	65	29.1667	40	5
29729	50	18.75	95.8333	71.6667	22.9167	25	5
29730	66.6667	12.5	91.6667	75	14.5833	50	5
29731	83.3333	0	95.8333	81.6667	0	15	3
29733	54.1667	15.625	100	73.3333	27.0833	0	4
29734	45.8333	0	95.8333	75	14.5833	5	4
29736	87.5	40.625	62.5	80	31.25	55	2
29737	87.5	6.25	87.5	88.3333	4.16667	55	5
29739	100	0	100	100	9.09091	20	3
29740	91.6667	28.125	100	96.6667	27.0833	15	3
29741	37.5	21.875	75	53.3333	22.9167	0	5
29742	83.3333	18.75	79.1667	80	25	40	5
29743	66.6667	56.25	62.5	71.6667	47.9167	40	4
29745	45.8333	34.375	70.8333	60	31.25	20	4
29746	41.6667	50	66.6667	60	47.9167	45	4
29747	91.6667	3.125	100	95	2.08333	20	3
29748	79.1667	21.875	62.5	78.3333	22.9167	40	3
29749	50	15.625	75	68.3333	18.75	25	5
29750	83.3333	0	91.6667	83.3333	0	50	4
29751	25	40.625	95.8333	61.6667	33.3333	10	4
29752	62.5	28.125	83.3333	65	27.0833	30	5
29753	79.1667	12.5	91.6667	86.6667	22.9167	30	4
29754	83.3333	12.5	83.3333	81.6667	10.4167	15	5
29755	62.5	15.625	79.1667	70	16.6667	15	5
29756	75	56.25	95.8333	86.6667	54.1667	30	3
29757	79.1667	15.625	87.5	85	12.5	50	4
29758	37.5	0	66.6667	51.6667	10.4167	20	3
29760	100	18.75	95.8333	93.3333	14.5833	25	5
29761	95.8333	12.5	87.5	88.3333	8.33333	45	6
29762	50	31.25	95.8333	70	33.3333	25	3
29764	41.6667	10.7143	83.3333	62.5	13.6364	30	5
29765	66.6667	31.25	62.5	68.3333	29.1667	30	4
29766	91.6667	3.125	95.8333	90	2.08333	30	6
29767	79.1667	18.75	87.5	88.3333	22.9167	15	5
29769	87.5	56.25	95.8333	93.3333	50	35	4
29771	45.8333	15.625	95.8333	70	22.9167	5	5
29772	50	34.375	66.6667	61.6667	37.5	50	5
29773	66.6667	21.875	83.3333	80	25	20	3
29774	70.8333	28.125	91.6667	81.6667	27.0833	35	5
29775	75	71.875	45.8333	68.3333	62.5	85	3
29777	87.5	0	100	93.3333	6.25	10	5
29779	45.8333	18.75	70.8333	65	25	20	4
29780	75	6.25	83.3333	75	16.6667	35	4
29781	45.8333	46.875	87.5	65	39.5833	10	5
29783	75	37.5	66.6667	71.6667	43.75	35	4
29784	91.6667	15.625	95.8333	95	20.8333	25	3
29785	95.8333	0	91.6667	91.6667	0	50	3
29786	45.8333	43.75	79.1667	65	41.6667	40	5
29788	75	28.125	70.8333	78.3333	22.9167	30	5
29789	66.6667	18.75	66.6667	71.6667	20.8333	20	9
29790	83.3333	3.125	100	83.3333	10.4167	25	4
29791	75	28.125	79.1667	81.6667	31.25	5	5
29793	66.6667	12.5	95.8333	73.3333	16.6667	25	5
29794	79.1667	12.5	79.1667	81.6667	18.75	30	4
29796	100	6.25	95.8333	96.6667	8.33333	65	5
29798	79.1667	15.625	87.5	76.6667	14.5833	30	5
29799	66.6667	0	100	76.6667	8.33333	15	5
29800	62.5	25	79.1667	75	25	5	5
29801	79.1667	21.875	75	76.6667	18.75	35	4
29802	62.5	3.125	95	73.2143	10.4167	45	5
29803	37.5	53.125	87.5	70	43.75	10	5
29805	58.3333	34.375	87.5	76.6667	35.4167	25	4
29806	58.3333	12.5	87.5	73.3333	18.75	20	5
29809	87.5	84.375	91.6667	91.6667	79.1667	45	3
29810	37.5	25	70.8333	61.6667	27.0833	25	4
29812	66.6667	18.75	45.8333	61.6667	16.6667	12.5	4
29814	62.5	12.5	87.5	78.3333	16.6667	40	3
29815	58.3333	62.5	100	80	62.5	30	4
29816	95.8333	21.875	95.8333	96.6667	18.75	10	5
29817	66.6667	18.75	95.8333	75	25	45	4
29818	58.3333	46.875	58.3333	66.6667	45.8333	35	3
29819	66.6667	25	80	73.3333	25	10	3
29820	54.1667	0	100	71.6667	0	10	5
29821	66.6667	9.375	79.1667	73.3333	14.5833	15	5
29822	75	6.25	83.3333	76.6667	10.4167	10	5
29823	70.8333	25	83.3333	83.3333	33.3333	30	5
29824	70.8333	9.375	75	73.3333	12.5	25	5
29827	37.5	43.75	66.6667	56.6667	39.5833	50	5
29828	37.5	3.125	95.8333	70	10.4167	0	3
29829	37.5	28.125	79.1667	51.6667	35.4167	20	3
29830	79.1667	6.25	100	85	14.5833	15	5
29831	66.6667	18.75	70.8333	75	22.9167	40	4
29833	79.1667	50	95.8333	90	50	40	4
29835	83.3333	28.125	91.6667	91.6667	27.0833	25	5
29836	41.6667	34.375	100	68.3333	29.1667	10	6
29838	62.5	12.5	95.8333	75	16.6667	35	5
29840	87.5	21.875	87.5	90	20.8333	15	5
29841	79.1667	31.25	87.5	86.6667	29.1667	35	5
29842	37.5	0	83.3333	51.6667	4.54545	5	5
29844	29.1667	25	79.1667	53.3333	33.3333	30	4
29845	41.6667	15.625	50	53.3333	18.75	30	5
29846	29.1667	12.5	45.8333	55	25	35	5
29847	50	18.75	95.8333	75	22.9167	25	3
29848	70.8333	6.25	75	76.6667	16.6667	20	5
29849	91.6667	31.25	100	95	33.3333	40	5
29851	79.1667	18.75	91.6667	85	25	30	3
29852	41.6667	21.875	79.1667	63.3333	25	10	5
29868	75	21.875	83.3333	80	27.0833	25	5
29869	79.1667	3.125	100	91.6667	4.16667	50	4
29870	50	35.7143	20.8333	53.3333	31.8182	10	3
29874	62.5	9.375	95.8333	80	14.5833	20	4
29875	87.5	9.375	66.6667	73.3333	10.4167	70	5
29876	50	12.5	91.6667	78.5714	14.5833	10	5
29878	45.8333	21.875	91.6667	61.6667	20.8333	10	3
29879	66.6667	43.75	87.5	80	37.5	15	5
29880	58.3333	21.4286	83.3333	73.3333	20.4545	15	4
29883	62.5	21.875	79.1667	73.3333	27.0833	20	5
29885	37.5	28.125	87.5	71.6667	35.4167	15	3
29886	29.1667	21.875	62.5	51.6667	20.8333	25	5
29887	41.6667	31.25	95.8333	75	41.6667	50	3
29888	25	68.75	54.1667	55	60.4167	15	3
29889	45.8333	21.4286	75	60	22.7273	15	5
29890	50	34.375	95.8333	70	39.5833	30	5
29891	45.8333	28.125	70.8333	65	29.1667	30	5
29892	87.5	31.25	95.8333	94.6429	31.25	15	3
29893	91.6667	12.5	100	93.3333	14.5833	35	3
29894	62.5	21.875	79.1667	71.6667	22.9167	15	5
29895	75	15.625	79.1667	73.3333	20.8333	40	4
29896	45.8333	65.625	70.8333	56.6667	56.25	25	4
29897	58.3333	28.125	91.6667	81.6667	31.25	25	4
29901	54.1667	21.4286	75	73.3333	29.5455	25	5
29902	87.5	18.75	100	88.3333	20.8333	40	3
29903	41.6667	18.75	100	76.6667	18.75	30	3
29904	70	28.125	95.8333	83.9286	31.25	20	3
29905	70.8333	59.375	79.1667	73.2143	50	18.75	5
29906	33.3333	25	87.5	62.5	22.9167	10	5
29907	95.8333	0	87.5	85	6.25	25	4
29908	45.8333	50	83.3333	68.3333	41.6667	35	5
29909	75	12.5	83.3333	83.3333	16.6667	0	5
29910	66.6667	35.7143	58.3333	66.6667	27.2727	35	4
29911	37.5	40.625	75	60	37.5	20	4
29912	41.6667	9.375	91.6667	65	12.5	30	5
29914	54.1667	31.25	87.5	68.3333	38.6364	15	4
29915	45.8333	6.25	75	60	16.6667	45	5
29917	87.5	31.25	83.3333	88.3333	27.0833	30	5
29918	62.5	37.5	83.3333	76.6667	35.4167	25	4
29920	100	0	100	83.3333	0	30	3
29921	87.5	12.5	95.8333	90	14.5833	20	3
29922	87.5	18.75	87.5	90	22.9167	30	3
29923	58.3333	3.125	95.8333	76.6667	14.5833	15	3
29924	50	21.875	79.1667	65	18.75	25	3
29925	83.3333	25	87.5	88.3333	18.75	55	3
29926	70.8333	28.125	83.3333	80	31.25	35	5
29927	70.8333	18.75	87.5	80	18.75	20	5
29928	66.6667	25	91.6667	83.3333	22.9167	15	5
29931	45.8333	6.25	75	60	10.4167	10	4
29932	29.1667	40.625	83.3333	61.6667	37.5	35	5
29933	66.6667	25	100	85	27.0833	20	3
29934	41.6667	28.125	70.8333	53.3333	29.1667	25	5
29935	79.1667	6.25	100	88.3333	6.25	20	5
29936	66.6667	9.375	79.1667	78.3333	12.5	20	6
29939	41.6667	21.875	91.6667	63.3333	31.25	15	4
29940	75	40.625	83.3333	78.3333	35.4167	60	5
29941	87.5	14.2857	95	89.2857	9.09091	45	5
29942	75	15.625	91.6667	88.3333	29.1667	30	5
29943	66.6667	3.125	91.6667	76.6667	14.5833	40	5
29946	70.8333	18.75	83.3333	78.3333	18.75	45	5
29947	54.1667	46.875	75	70	47.9167	45	5
29949	45.8333	15.625	62.5	53.3333	14.5833	40	3
29950	58.3333	53.125	54.1667	65	50	50	5
30906	87.5	0	95.8333	86.6667	2.08333	30	5
30907	70.8333	37.5	83.3333	76.6667	39.5833	10	5
30908	79.1667	15.625	75	78.3333	16.6667	25	5
30910	79.1667	15.625	95.8333	85	16.6667	40	5
30911	83.3333	6.25	95.8333	85	6.25	15	3
30912	83.3333	15.625	95.8333	86.6667	12.5	45	5
30913	91.6667	6.25	95.8333	91.6667	4.16667	45	5
30914	70.8333	12.5	95.8333	83.3333	10.4167	10	5
30915	58.3333	53.125	87.5	78.3333	45.8333	50	5
30916	54.1667	37.5	91.6667	73.3333	35.4167	25	4
30917	62.5	46.875	75	73.3333	43.75	45	5
30918	33.3333	31.25	75	60	33.3333	10	5
30919	66.6667	21.875	100	80.3571	25	10	4
30920	70.8333	9.375	95.8333	83.3333	20.8333	15	5
30921	66.6667	12.5	91.6667	71.6667	16.6667	10	3
30922	83.3333	6.25	87.5	88.3333	14.5833	20	5
30923	66.6667	34.375	95.8333	80	37.5	20	5
30925	70.8333	3.125	83.3333	76.7857	2.08333	5	5
30926	45.8333	50	62.5	61.6667	41.6667	20	5
30927	54.1667	28.125	62.5	63.3333	29.1667	50	5
30928	79.1667	0	100	91.6667	8.33333	20	4
30929	54.1667	34.375	87.5	71.6667	37.5	15	4
30930	37.5	46.875	91.6667	65	47.9167	15	3
30931	33.3333	12.5	70.8333	66.6667	14.5833	5	4
30932	58.3333	34.375	87.5	70	35.4167	30	5
30933	66.6667	59.375	66.6667	70	43.75	20	3
30936	45.8333	3.125	79.1667	61.6667	12.5	10	4
30937	50	12.5	91.6667	75	18.75	10	4
30938	33.3333	6.25	91.6667	60.7143	25	30	5
30939	70.8333	18.75	95.8333	81.6667	18.75	55	5
30940	91.6667	12.5	91.6667	88.3333	14.5833	35	6
30941	50	18.75	79.1667	70	18.75	20	5
30942	79.1667	50	95.8333	85	41.6667	25	4
30943	87.5	3.125	95.8333	86.6667	6.25	30	5
30944	70.8333	12.5	70.8333	78.3333	16.6667	65	5
30945	62.5	9.375	91.6667	73.3333	18.75	25	5
30946	70.8333	15.625	66.6667	80	16.6667	40	3
30947	95.8333	34.375	87.5	93.3333	31.25	35	4
30948	45.8333	40.625	95.8333	73.3333	39.5833	25	7
30949	66.6667	65.625	75	73.3333	50	15	3
30950	66.6667	28.125	70.8333	75	31.25	40	4
30951	8.33333	21.875	90	48.2143	27.0833	10	4
30952	58.3333	6.25	54.1667	61.6667	6.25	35	4
30953	54.1667	0	100	71.4286	0	10	4
30954	37.5	21.875	75	55	25	15	5
30956	83.3333	3.125	100	90	2.08333	40	6
30957	83.3333	9.375	91.6667	83.3333	8.33333	30	4
30958	87.5	3.125	95.8333	86.6667	2.08333	20	3
30959	79.1667	12.5	95.8333	90	18.75	10	4
30963	45.8333	15.625	87.5	71.6667	25	10	4
30964	91.6667	9.375	91.6667	88.3333	12.5	30	4
30965	95.8333	12.5	83.3333	95	12.5	30	5
30966	54.1667	15.625	87.5	73.3333	22.9167	25	3
30967	45.8333	10.7143	62.5	58.3333	9.09091	15	5
30968	54.1667	12.5	91.6667	75	20.8333	10	3
30970	87.5	6.25	100	88.3333	8.33333	30	5
30971	54.1667	46.875	79.1667	65	39.5833	35	3
30972	95.8333	62.5	95.8333	95	64.5833	45	4
31905	75	37.5	85	80.3571	34.0909	45	4
31906	45.8333	31.25	87.5	71.6667	37.5	15	5
31908	66.6667	34.375	91.6667	83.3333	37.5	30	5
31909	41.6667	50	75	65	52.0833	35	5
31911	50	18.75	79.1667	66.6667	25	20	4
31912	50	31.25	87.5	73.3333	35.4167	15	3
31914	83.3333	0	100	91.6667	18.75	15	5
31915	62.5	9.375	83.3333	71.6667	12.5	15	3
31916	41.6667	28.125	95.8333	70	35.4167	5	3
31917	83.3333	15.625	83.3333	86.6667	14.5833	35	4
31918	58.3333	18.75	87.5	76.6667	20.8333	10	5
31920	37.5	42.8571	62.5	56.6667	38.6364	25	5
31921	70.8333	15.625	87.5	80	14.5833	40	3
31922	87.5	9.375	79.1667	86.6667	20.8333	55	4
31923	45.8333	3.125	83.3333	73.3333	2.08333	30	5
31924	41.6667	12.5	100	68.3333	14.5833	0	5
31925	41.6667	9.375	83.3333	68.3333	22.9167	35	4
31926	66.6667	6.25	75	76.6667	10.4167	30	4
31927	66.6667	9.375	91.6667	85	18.75	20	3
31932	41.6667	50	75	65	52.0833	35	5
31933	62.5	6.25	87.5	81.6667	18.75	20	5
31935	50	37.5	87.5	75	35.4167	30	5
31937	80	18.75	95.8333	91.0714	25	20	3
31939	75	28.125	87.5	86.6667	25	15	5
31940	87.5	59.375	91.6667	83.3333	50	35	3
31941	66.6667	3.125	79.1667	70	6.25	30	4
31942	58.3333	46.875	75	73.3333	41.6667	40	5
31943	54.1667	25	95.8333	76.6667	22.9167	30	5
31944	50	6.25	70.8333	61.6667	13.6364	30	5
31945	66.6667	34.375	83.3333	78.3333	33.3333	31.25	4
31946	41.6667	21.875	62.5	55	18.75	25	4
31947	37.5	37.5	83.3333	56.6667	35.4167	10	5
31948	37.5	21.875	91.6667	61.6667	22.9167	30	5
31949	83.3333	31.25	100	90	31.25	35	4
31950	75	31.25	100	86.6667	35.4167	40	5
31951	58.3333	9.375	91.6667	71.6667	8.33333	30	4
31952	87.5	3.125	100	90	4.16667	40	5
31954	65	15.625	87.5	76.9231	27.0833	40	3
31955	91.6667	9.375	79.1667	78.3333	12.5	40	5
31956	79.1667	15.625	87.5	80	25	15	5
31957	58.3333	6.25	91.6667	70	8.33333	30	5
31958	33.3333	34.375	75	63.3333	33.3333	5	4
31959	25	31.25	100	56.6667	37.5	0	5
31960	45.8333	3.125	75	61.6667	4.16667	15	4
31962	66.6667	21.875	83.3333	78.3333	14.5833	30	5
31963	75	9.375	87.5	80	14.5833	15	3
31964	83.3333	12.5	100	93.3333	12.5	15	5
31965	83.3333	28.125	87.5	80	31.25	35	5
31966	54.1667	0	91.6667	66.6667	2.08333	10	5
31967	45.8333	9.375	62.5	58.3333	14.5833	10	4
31968	87.5	17.8571	79.1667	88.3333	25	35	3
31969	70.8333	18.75	83.3333	80	31.25	45	5
31970	66.6667	25	87.5	75	29.1667	30	4
31973	66.6667	53.125	58.3333	71.6667	43.1818	60	6
31974	87.5	18.75	95.8333	86.6667	18.75	15	3
31975	79.1667	3.125	95.8333	88.3333	16.6667	15	5
31976	20.8333	15.625	83.3333	51.6667	16.6667	15	5
31977	45.8333	6.25	83.3333	66.6667	12.5	10	5
31978	37.5	15.625	91.6667	75	35.4167	20	3
31979	50	15.625	79.1667	68.3333	16.6667	10	5
31980	95.8333	6.25	100	93.3333	6.25	35	6
31981	33.3333	12.5	95.8333	61.6667	18.75	5	4
31982	45.8333	25	50	53.3333	31.25	35	5
31983	37.5	37.5	50	55	31.25	35	3
31984	83.3333	9.375	87.5	86.6667	12.5	45	5
31985	58.3333	40.625	83.3333	71.6667	43.75	55	7
31986	70.8333	12.5	91.6667	85	14.5833	15	5
31987	37.5	62.5	95.8333	60	52.0833	15	3
31988	45.8333	18.75	79.1667	68.3333	16.6667	10	5
31989	66.6667	43.75	66.6667	73.3333	39.5833	40	5
31990	20.8333	21.875	87.5	58.3333	20.8333	15	4
31991	66.6667	0	100	85	6.25	5	5
31993	75	40.625	95.8333	88.3333	39.5833	40	4
31994	75	12.5	83.3333	76.6667	12.5	50	5
31995	66.6667	31.25	79.1667	75	22.9167	30	2
31996	75	31.25	87.5	81.6667	31.25	20	3
31997	91.6667	9.375	91.6667	88.3333	12.5	25	4
31998	87.5	9.375	87.5	78.3333	18.75	30	3
32000	91.6667	3.125	100	93.3333	2.08333	35	5
32001	66.6667	15.625	79.1667	73.3333	22.9167	40	5
32002	58.3333	9.375	100	76.6667	18.75	20	3
32003	66.6667	15.625	83.3333	75	14.5833	50	4
32004	35	28.125	75	50	25	25	4
32005	45.8333	9.375	83.3333	70	12.5	10	5
32006	83.3333	0	95.8333	88.3333	8.33333	40	5
32007	45.8333	6.25	91.6667	68.3333	14.5833	10	5
32008	66.6667	6.25	100	81.6667	10.4167	25	5
32009	54.1667	28.125	75	73.3333	33.3333	40	5
32010	66.6667	62.5	75	75	52.0833	15	4
32012	83.3333	25	83.3333	85	29.1667	30	5
32013	95.8333	0	100	91.6667	0	30	4
32014	87.5	31.25	83.3333	85	41.6667	60	4
32015	70.8333	21.875	83.3333	80	27.0833	30	4
32016	70.8333	18.75	87.5	80	20.8333	25	5
32017	66.6667	31.25	87.5	78.3333	35.4167	45	5
32018	54.1667	28.125	70.8333	63.3333	31.25	35	7
32019	87.5	6.25	100	85.7143	8.33333	20	5
32020	75	21.875	91.6667	83.3333	27.0833	45	5
32021	91.6667	3.125	83.3333	88.3333	6.25	10	5
32022	100	12.5	100	100	10.4167	10	3
32023	75	21.875	91.6667	81.6667	18.75	40	5
32024	29.1667	25	100	66.6667	29.1667	10	5
32025	75	18.75	100	80	27.0833	35	3
32026	37.5	40.625	95.8333	68.3333	41.6667	10	5
32027	75	25	79.1667	76.6667	29.1667	30	5
32028	75	15.625	100	78.3333	16.6667	20	3
32029	58.3333	9.375	91.6667	75	12.5	20	5
32030	8.33333	12.5	41.6667	33.3333	12.5	10	5
32032	79.1667	15.625	95.8333	78.3333	20.8333	20	5
32034	58.3333	3.125	83.3333	76.6667	18.75	20	5
32035	79.1667	6.25	91.6667	88.3333	6.25	20	4
32036	85	6.25	95.8333	89.2857	12.5	35	3
32037	83.3333	21.875	83.3333	73.3333	18.75	25	4
32038	95.8333	56.25	95.8333	91.6667	52.0833	35	5
32039	62.5	15.625	83.3333	73.3333	18.75	15	4
32040	79.1667	31.25	87.5	85	33.3333	35	3
32041	33.3333	56.25	91.6667	63.3333	50	10	3
32042	65	6.25	70.8333	62.5	8.33333	40	4
32043	54.1667	37.5	62.5	63.3333	33.3333	30	4
32044	62.5	40.625	91.6667	85	41.6667	40	5
32045	95.8333	7.14286	87.5	93.3333	18.1818	45	5
32047	62.5	25	66.6667	68.3333	27.0833	30	5
32048	37.5	3.125	75	61.6667	12.5	15	5
32049	75	40.625	75	80	33.3333	35	4
32050	45.8333	18.75	91.6667	68.3333	25	20	7
32052	91.6667	6.25	95.8333	95	16.6667	55	4
32053	79.1667	50	79.1667	81.6667	39.5833	30	4
32054	62.5	46.875	91.6667	80	45.8333	20	4
32055	54.1667	6.25	79.1667	70	12.5	35	5
32056	58.3333	15.625	79.1667	73.3333	18.75	25	3
32057	80	8.33333	80	78.5714	22.5	45	7
32059	70.8333	25	83.3333	83.3333	31.25	15	5
32060	91.6667	25	91.6667	95	33.3333	40	4
32061	37.5	28.125	83.3333	61.6667	29.1667	25	5
32062	50	28.125	75	68.3333	35.4167	25	5
32063	70.8333	9.375	100	88.3333	10.4167	15	5
32064	83.3333	9.375	83.3333	85	12.5	40	4
32065	58.3333	18.75	91.6667	75	25	20	5
32068	87.5	3.125	100	78.3333	4.16667	30	3
32069	37.5	25	45.8333	51.6667	27.0833	25	5
32070	66.6667	46.875	83.3333	70	41.6667	25	5
32072	50	18.75	83.3333	70	22.9167	5	3
32073	79.1667	15.625	87.5	88.3333	10.4167	15	4
32075	58.3333	12.5	83.3333	68.3333	16.6667	30	3
32076	54.1667	28.125	66.6667	65	27.0833	30	3
32077	75	12.5	83.3333	76.6667	16.6667	40	4
32078	58.3333	0	54.1667	65	6.25	20	5
32079	83.3333	46.875	79.1667	85	37.5	30	5
32080	75	25	91.6667	81.6667	22.9167	20	4
32081	79.1667	18.75	91.6667	83.3333	16.6667	30	5
32082	58.3333	21.875	95.8333	81.6667	25	50	3
32083	54.1667	37.5	100	75	41.6667	10	4
32084	62.5	9.375	95.8333	81.6667	10.4167	5	5
32085	66.6667	40.625	79.1667	80	41.6667	25	5
32086	75	37.5	90	83.9286	31.25	40	6
32087	66.6667	40.625	50	65	31.25	30	5
32090	75	12.5	79.1667	78.3333	10.4167	25	4
32091	62.5	0	100	85	20.8333	30	5
32092	62.5	21.875	83.3333	75	22.9167	35	4
32094	50	6.25	95.8333	71.6667	16.6667	10	4
32095	50	37.5	83.3333	76.6667	37.5	35	5
32096	54.1667	15.625	75	61.6667	20.8333	30	5
32097	83.3333	21.875	95.8333	88.3333	20.8333	30	5
32098	83.3333	53.125	100	88.3333	50	40	3
32099	41.6667	31.25	95.8333	70	43.75	15	5
32100	79.1667	28.125	87.5	76.6667	29.1667	15	4
32102	83.3333	12.5	91.6667	90	14.5833	25	5
32103	87.5	6.25	85	82.1429	18.75	15	3
32105	95.8333	0	100	93.3333	0	15	4
32108	75	21.875	87.5	86.6667	14.5833	30	4
32109	79.1667	21.875	83.3333	86.6667	25	25	3
32110	66.6667	25	75	66.6667	22.9167	25	5
32111	66.6667	43.75	66.6667	75	39.5833	40	4
32112	54.1667	34.375	66.6667	66.0714	33.3333	25	4
32113	83.3333	18.75	95.8333	90	22.9167	30	5
32115	95.8333	3.125	91.6667	95	4.16667	35	3
32116	75	28.125	83.3333	81.6667	22.9167	50	3
32117	25	42.8571	58.3333	46.6667	36.3636	10	4
32118	91.6667	0	100	96.6667	4.16667	30	4
32119	66.6667	25	87.5	81.6667	27.0833	25	5
32120	66.6667	12.5	83.3333	73.3333	16.6667	10	4
32121	50	21.875	83.3333	61.6667	25	20	3
32122	80	40.625	75	76.7857	39.5833	20	3
32123	91.6667	9.375	70.8333	80	12.5	55	6
32125	75	37.5	75	75	31.25	20	6
32126	75	15.625	79.1667	78.3333	16.6667	15	5
32127	87.5	3.125	91.6667	91.6667	10.4167	30	5
32129	75	15.625	83.3333	80	27.0833	35	4
32130	41.6667	15.625	87.5	63.3333	22.9167	10	5
32131	66.6667	40.625	83.3333	76.6667	45.8333	55	3
32132	58.3333	56.25	79.1667	73.3333	54.1667	40	5
32134	70.8333	15.625	79.1667	76.6667	18.75	25	3
32135	95.8333	9.375	79.1667	85	12.5	30	3
32136	62.5	9.375	100	78.3333	8.33333	35	4
32137	50	21.875	91.6667	70	25	15	5
32139	70.8333	0	79.1667	80	6.25	30	5
32141	54.1667	15.625	100	76.6667	18.75	5	3
32142	75	6.25	100	86.6667	20.8333	37.5	3
32144	75	25	75	78.3333	25	20	5
32146	79.1667	25	87.5	83.3333	29.1667	25	4
32147	41.6667	71.875	75	68.3333	61.3636	20	5
32148	62.5	50	54.1667	60	50	62.5	5
32149	16.6667	12.5	87.5	45	12.5	10	3
32151	58.3333	15.625	79.1667	78.3333	29.1667	10	5
32152	41.6667	21.875	70.8333	60	22.9167	25	5
32155	75	34.375	83.3333	83.3333	33.3333	15	5
32156	95.8333	3.125	66.6667	83.3333	2.08333	55	4
32158	85	21.875	100	89.2857	25	15	3
32159	37.5	18.75	66.6667	60	18.75	25	5
32160	70.8333	21.875	70.8333	75	31.25	60	5
32162	54.1667	12.5	79.1667	66.6667	18.75	30	5
32164	50	56.25	70.8333	66.6667	52.0833	40	5
32165	79.1667	21.875	95.8333	90	20.8333	30	4
32166	66.6667	59.375	75	71.6667	54.1667	30	5
32167	29.1667	9.375	95.8333	66.6667	14.5833	10	3
32168	87.5	3.125	100	88.3333	8.33333	25	5
32169	79.1667	21.875	79.1667	76.6667	18.75	20	5
32170	66.6667	18.75	83.3333	78.3333	20.8333	50	5
32171	87.5	0	100	95	10.4167	50	5
32172	91.6667	6.25	91.6667	90	8.33333	20	5
32175	75	46.875	79.1667	80	41.6667	40	5
32176	70.8333	9.375	83.3333	80	16.6667	55	4
32178	41.6667	3.125	87.5	60	12.5	5	5
32179	33.3333	18.75	79.1667	56.6667	22.9167	20	7
32180	87.5	21.875	95.8333	85	20.8333	45	4
32181	79.1667	25	95.8333	85	22.9167	25	3
32183	75	40.625	83.3333	80	29.1667	15	4
32184	70.8333	18.75	83.3333	78.3333	22.9167	25	4
32185	95.8333	15.625	100	95	12.5	25	5
32187	91.6667	0	83.3333	83.3333	0	40	5
32189	8.33333	37.5	91.6667	53.3333	37.5	15	3
32190	41.6667	25	50	53.3333	29.5455	55	5
32191	66.6667	31.25	66.6667	68.3333	29.1667	60	5
32192	79.1667	25	100	85	27.0833	40	5
32193	70.8333	12.5	79.1667	76.6667	18.75	25	6
32194	54.1667	0	95.8333	70	12.5	0	4
32195	29.1667	25	79.1667	56.6667	29.1667	5	5
32196	91.6667	0	95.8333	91.6667	6.25	45	5
32197	70.8333	18.75	87.5	78.3333	18.75	30	5
32198	83.3333	6.25	91.6667	86.6667	6.25	30	4
32199	66.6667	0	95.8333	75	10.4167	20	3
32200	75	6.25	75	75	10.4167	20	5
32201	50	9.375	83.3333	58.3333	14.5833	10	5
32202	91.6667	34.375	95.8333	93.3333	29.1667	20	4
32204	95.8333	43.75	91.6667	88.3333	52.0833	60	5
32205	54.1667	21.875	70.8333	66.6667	25	25	4
32209	66.6667	40.625	70.8333	71.6667	41.6667	18.75	5
32210	54.1667	6.25	100	76.6667	12.5	10	5
32211	91.6667	15.625	100	95	16.6667	10	5
32212	79.1667	12.5	91.6667	85	14.5833	30	3
32214	45.8333	15.625	62.5	56.6667	16.6667	35	3
32215	58.3333	43.75	79.1667	70	35.4167	25	6
32216	95.8333	12.5	95.8333	96.6667	12.5	15	4
32217	50	25	87.5	70	31.25	15	4
32218	83.3333	3.125	95.8333	90	4.16667	35	4
32219	95.8333	0	100	98.3333	10.4167	35	5
32220	75	6.25	87.5	83.3333	14.5833	25	5
32221	20.8333	12.5	54.1667	40	18.75	15	5
32223	45.8333	28.125	91.6667	63.3333	25	35	3
32224	75	12.5	66.6667	66.6667	20.8333	20	5
32226	58.3333	34.375	70.8333	73.3333	35.4167	30	3
32228	79.1667	25	85	85.7143	35.4167	25	3
32231	91.6667	9.375	83.3333	90	12.5	40	4
32234	75	50	79.1667	80	41.6667	60	5
32235	58.3333	21.875	95.8333	81.6667	22.9167	40	3
32238	20.8333	9.375	87.5	55	14.5833	20	3
32242	54.1667	12.5	66.6667	68.3333	16.6667	20	4
32244	54.1667	15.625	95.8333	73.3333	20.8333	15	3
32245	66.6667	12.5	83.3333	75	10.4167	20	5
32246	66.6667	40.625	75	75	45.8333	30	5
32248	66.6667	46.4286	95.8333	86.6667	45.4545	30	4
32250	62.5	8.33333	95	82.1429	10	25	5
32251	91.6667	18.75	91.6667	93.3333	20.8333	30	4
32252	79.1667	15.625	100	86.6667	16.6667	20	5
32253	58.3333	31.25	91.6667	73.3333	25	35	5
32256	83.3333	10.7143	83.3333	76.6667	13.6364	25	5
32257	25	25	62.5	55	22.9167	20	4
32258	66.6667	12.5	75	75	16.6667	20	5
32259	79.1667	6.25	87.5	83.3333	8.33333	40	5
32260	83.3333	0	100	91.6667	6.25	30	2
32261	66.6667	28.125	70.8333	73.3333	27.0833	40	5
32262	66.6667	18.75	95.8333	80	20.8333	10	4
32263	54.1667	15.625	95.8333	75	22.9167	15	5
32264	70.8333	43.75	95.8333	83.3333	39.5833	40	6
32265	29.1667	18.75	87.5	60	20.8333	30	5
32266	62.5	15.625	87.5	71.6667	16.6667	30	5
32267	29.1667	50	33.3333	45	39.5833	15	3
32268	25	25	91.6667	56.6667	25	10	3
32269	91.6667	0	91.6667	91.6667	2.08333	10	5
32271	79.1667	12.5	91.6667	86.6667	8.33333	55	5
32272	70.8333	21.875	100	85	22.9167	40	5
32273	54.1667	9.375	95.8333	78.3333	10.4167	15	5
32274	87.5	28.125	91.6667	93.3333	29.1667	10	3
32275	20.8333	18.75	95.8333	65	22.9167	5	5
32277	70.8333	18.75	91.6667	81.6667	20.8333	25	5
32278	25	28.125	79.1667	60	31.25	20	5
32280	75	15.625	91.6667	83.3333	11.3636	25	4
32281	83.3333	42.8571	91.6667	90	38.6364	35	5
32282	50	9.375	91.6667	73.0769	16.6667	15	3
32283	83.3333	15.625	87.5	88.3333	22.9167	20	5
32284	54.1667	12.5	91.6667	75	27.0833	10	5
32285	83.3333	56.25	100	86.6667	52.0833	55	4
32287	62.5	6.25	83.3333	78.3333	10.4167	5	5
32288	91.6667	28.125	87.5	83.3333	25	15	5
32289	91.6667	40.625	91.6667	91.6667	45.8333	20	3
32290	79.1667	9.375	100	88.3333	25	40	5
32291	62.5	15.625	83.3333	71.6667	22.9167	30	5
32292	79.1667	12.5	87.5	85	14.5833	40	5
32294	25	50	66.6667	48.3333	45.4545	10	5
32297	37.5	21.875	87.5	66.6667	22.9167	30	5
32298	66.6667	40.625	95.8333	85	35.4167	15	3
32299	50	25	79.1667	66.6667	20.8333	20	5
32300	54.1667	21.875	83.3333	66.6667	18.75	10	5
32301	70.8333	15.625	87.5	78.3333	22.9167	40	5
32303	100	6.25	100	100	12.5	20	4
32305	66.6667	34.375	83.3333	78.3333	41.6667	20	3
32306	62.5	0	79.1667	70	10.4167	30	4
32307	62.5	40.625	75	65	35.4167	55	5
32308	87.5	12.5	95.8333	90	18.75	25	5
32309	41.6667	25	91.6667	66.6667	33.3333	25	4
32311	83.3333	34.375	95.8333	91.6667	38.6364	25	5
32313	41.6667	35.7143	75	56.6667	36.3636	25	5
32314	62.5	53.125	100	78.3333	58.3333	10	3
32317	87.5	9.375	62.5	86.6667	9.09091	30	7
32318	62.5	25	100	81.6667	22.9167	10	4
32319	58.3333	18.75	83.3333	69.6429	20.8333	10	7
32320	54.1667	50	87.5	73.3333	41.6667	20	4
32321	91.6667	6.25	95.8333	86.6667	4.16667	55	4
32323	90	12.5	100	92.8571	16.6667	10	5
32324	95.8333	0	100	98.3333	8.33333	20	4
32325	79.1667	25	91.6667	85	27.0833	35	3
32326	75	12.5	87.5	81.6667	16.6667	35	5
32327	87.5	15.625	100	88.3333	16.6667	30	5
32330	54.1667	15.625	87.5	68.3333	18.75	20	3
32331	79.1667	21.875	87.5	83.3333	22.9167	35	4
32332	45.8333	46.875	91.6667	75	37.5	30	5
32333	79.1667	21.875	95.8333	86.6667	22.9167	25	4
32334	54.1667	40.625	95.8333	73.3333	37.5	25	5
32335	95.8333	3.125	91.6667	93.3333	6.25	55	5
32336	41.6667	56.25	95.8333	70	47.9167	5	4
32337	54.1667	37.5	79.1667	75	37.5	30	5
32338	70.8333	25	75	76.6667	33.3333	45	6
32339	41.6667	18.75	83.3333	65	18.75	20	5
32340	66.6667	12.5	100	85	16.6667	10	4
32341	16.6667	25	75	53.3333	31.25	10	4
32343	70.8333	3.125	83.3333	81.6667	14.5833	15	5
32344	50	3.125	91.6667	68.3333	8.33333	18.75	5
32346	75	9.375	91.6667	81.6667	10.4167	40	3
32347	62.5	0	91.6667	78.3333	10.4167	10	6
32348	62.5	6.25	79.1667	71.6667	6.25	20	5
32349	54.1667	31.25	70.8333	63.3333	29.1667	30	4
32350	62.5	15.625	87.5	78.3333	22.9167	35	6
32352	29.1667	25	79.1667	56.6667	22.9167	5	3
32354	54.1667	25	87.5	70	25	5	4
32356	60	28.125	87.5	78.5714	22.9167	30	5
32362	62.5	40.625	87.5	80	35.4167	20	5
32373	41.6667	21.875	83.3333	65	18.75	15	4
32375	91.6667	15.625	95.8333	88.3333	16.6667	25	7
32377	66.6667	18.75	79.1667	76.6667	22.9167	15	5
32378	37.5	25	100	73.3333	25	10	4
32379	70.8333	28.125	66.6667	76.6667	29.1667	30	3
32380	62.5	53.125	75	71.6667	45.8333	40	5
32382	75	0	87.5	76.6667	2.08333	20	4
32383	45.8333	6.25	95.8333	70	12.5	10	4
32384	50	40.625	79.1667	70	47.9167	40	5
32385	95.8333	25	95.8333	92.8571	25	35	4
32386	66.6667	50	100	86.6667	50	75	5
32387	83.3333	40.625	87.5	88.3333	35.4167	15	5
32388	29.1667	3.125	83.3333	60	10.4167	30	5
32389	87.5	3.125	83.3333	90	4.16667	40	4
32390	54.1667	12.5	79.1667	67.8571	22.9167	45	5
32391	54.1667	28.125	83.3333	70	27.0833	30	3
32392	58.3333	9.375	91.6667	78.3333	14.5833	15	5
32393	66.6667	25	66.6667	71.6667	25	50	3
32397	79.1667	25	79.1667	71.6667	22.9167	30	4
32398	54.1667	18.75	66.6667	65	18.75	15	5
32399	75	12.5	91.6667	78.3333	14.5833	40	4
32400	70.8333	15.625	83.3333	78.3333	20.8333	15	4
32401	45	34.375	87.5	73.2143	35.4167	15	3
32403	70.8333	21.875	70.8333	75	31.25	45	4
32405	70.8333	25	79.1667	83.3333	34.0909	25	5
32406	62.5	21.875	95.8333	78.3333	25	10	5
32407	54.1667	6.25	87.5	78.3333	12.5	10	5
32408	66.6667	68.75	95.8333	80	52.0833	25	5
32409	83.3333	9.375	75	80	8.33333	35	4
32410	25	15.625	95.8333	55	18.75	5	6
32411	66.6667	12.5	91.6667	83.3333	16.6667	10	3
32412	50	18.75	87.5	71.6667	18.75	15	4
32413	83.3333	6.25	100	93.3333	6.25	15	4
32414	58.3333	9.375	100	76.6667	18.75	10	5
32415	79.1667	0	87.5	78.3333	4.16667	35	5
32416	79.1667	3.125	100	90	2.08333	5	5
32417	62.5	46.875	66.6667	71.6667	41.6667	50	6
32418	91.6667	0	100	96.6667	2.08333	12.5	5
32419	100	6.25	100	96.6667	6.25	40	5
32420	79.1667	3.125	95.8333	80	8.33333	25	5
32421	95.8333	15.625	95	91.0714	18.75	45	6
32422	83.3333	21.875	95.8333	93.3333	27.0833	30	3
32424	58.3333	12.5	75	75	12.5	35	5
32426	54.1667	28.125	83.3333	73.3333	29.1667	5	3
32427	54.1667	56.25	66.6667	70	47.9167	40	5
32428	66.6667	15.625	95.8333	81.6667	20.8333	35	5
32429	79.1667	15.625	91.6667	83.3333	10.4167	35	6
32431	66.6667	53.125	100	83.3333	56.25	30	7
32432	66.6667	21.875	91.6667	78.3333	22.9167	30	5
32433	87.5	18.75	87.5	91.6667	20.8333	40	5
32434	70.8333	43.75	70.8333	75	41.6667	35	3
32435	58.3333	56.25	95.8333	76.6667	52.0833	25	5
32436	66.6667	31.25	66.6667	66.6667	29.1667	20	3
32437	66.6667	34.375	91.6667	75	33.3333	30	5
32439	62.5	59.375	70.8333	66.6667	56.25	60	5
32440	87.5	3.125	75	85	10.4167	25	5
32441	58.3333	59.375	91.6667	76.6667	47.9167	30	4
32442	83.3333	12.5	91.6667	83.3333	16.6667	45	3
32443	41.6667	9.375	95.8333	70	16.6667	5	5
32446	45.8333	43.75	66.6667	65	35.4167	25	4
32447	58.3333	12.5	58.3333	61.6667	22.9167	30	5
32448	75	40.625	100	81.6667	35.4167	25	3
32449	55	34.375	62.5	64.2857	27.0833	25	5
32450	58.3333	3.125	79.1667	73.3333	10.4167	25	5
32451	75	43.75	75	76.6667	35.4167	25	5
32452	25	3.57143	87.5	66.6667	20.4545	10	3
32453	83.3333	43.75	50	78.3333	45.8333	65	5
32454	66.6667	9.375	66.6667	71.6667	14.5833	50	3
32455	79.1667	40.625	87.5	85	45.8333	35	5
32456	62.5	56.25	79.1667	71.6667	54.1667	25	3
32457	50	21.875	91.6667	68.3333	25	30	5
32458	50	40.625	91.6667	73.3333	47.9167	30	5
32459	62.5	25	91.6667	81.6667	29.1667	25	5
32460	16.6667	9.375	95.8333	63.3333	18.75	25	4
32462	66.6667	37.5	95.8333	80	35.4167	15	5
32463	70.8333	28.125	87.5	80	27.0833	20	5
32464	58.3333	46.875	29.1667	55	33.3333	40	6
32466	83.3333	3.125	100	88.3333	2.08333	40	4
32467	37.5	12.5	70.8333	65	25	10	5
32468	45.8333	56.25	100	73.3333	52.0833	43.75	3
32470	45.8333	53.125	75	60	50	15	5
32471	70.8333	28.125	87.5	73.3333	22.9167	50	5
32473	66.6667	46.875	79.1667	75	43.75	15	5
32474	70.8333	12.5	100	80	16.6667	15	3
32475	16.6667	0	37.5	45	0	10	3
32476	70.8333	40.625	100	80	45.8333	35	5
32477	54.1667	28.125	91.6667	68.3333	27.0833	25	5
32478	58.3333	46.875	91.6667	71.6667	43.75	10	5
32479	37.5	25	95.8333	63.3333	31.8182	20	3
32480	79.1667	25	87.5	81.6667	20.8333	25	5
32481	54.1667	28.125	54.1667	65	29.1667	40	4
32483	75	9.375	95.8333	83.3333	12.5	15	5
32485	91.6667	3.125	100	88.3333	4.16667	45	6
32486	70.8333	3.125	91.6667	86.6667	12.5	30	3
32489	66.6667	37.5	79.1667	65	31.25	20	3
32490	87.5	21.875	100	85	25	20	5
32491	83.3333	3.125	95.8333	83.3333	8.33333	25	5
32493	45.8333	15.625	100	67.8571	16.6667	25	5
32494	66.6667	28.125	79.1667	71.6667	22.9167	30	5
32495	75	12.5	100	81.6667	14.5833	20	3
32496	58.3333	25	83.3333	76.6667	27.0833	10	5
32497	62.5	21.875	87.5	73.3333	29.1667	45	5
32498	79.1667	25	87.5	78.3333	20.8333	20	4
32500	83.3333	6.25	91.6667	91.6667	10.4167	35	4
32504	62.5	6.25	87.5	75	6.25	20	5
32506	87.5	50	58.3333	73.3333	43.75	70	5
32507	66.6667	12.5	54.1667	71.6667	18.75	43.75	3
32508	70.8333	62.5	75	81.6667	58.3333	30	4
32510	45.8333	34.375	79.1667	63.3333	31.25	20	5
32511	62.5	9.375	66.6667	71.6667	16.6667	30	4
32512	54.1667	12.5	62.5	63.3333	14.5833	25	4
32513	54.1667	18.75	87.5	71.6667	22.9167	15	5
32515	66.6667	6.25	70.8333	75	14.5833	20	3
32516	30	28.125	41.6667	55.3571	33.3333	25	6
32517	87.5	12.5	75	85	16.6667	30	3
32518	79.1667	0	91.6667	83.3333	4.16667	5	3
32519	70.8333	9.375	91.6667	83.3333	12.5	10	4
32520	87.5	62.5	100	95	54.1667	50	4
32523	70.8333	6.25	95.8333	83.3333	10.4167	20	4
32524	45.8333	6.25	83.3333	58.3333	8.33333	25	5
32525	83.3333	9.375	95.8333	86.6667	12.5	30	4
32526	54.1667	21.875	75	73.3333	20.8333	15	5
32527	75	12.5	100	80.3571	20.8333	10	3
32529	29.1667	15.625	58.3333	50	18.75	15	5
32530	75	28.125	100	86.6667	27.0833	40	5
32531	95.8333	6.25	100	93.3333	8.33333	50	5
32532	45	31.25	75	63.4615	25	16.6667	5
32533	41.6667	9.375	75	63.3333	14.5833	25	5
32534	62.5	12.5	83.3333	75	12.5	10	4
32535	54.1667	62.5	75	71.6667	50	15	5
32536	16.6667	59.375	87.5	51.6667	47.9167	10	3
32537	75	18.75	83.3333	80	25	10	5
32539	58.3333	34.375	83.3333	73.3333	29.1667	10	3
32540	58.3333	31.25	87.5	75	33.3333	40	4
32541	79.1667	12.5	100	83.3333	12.5	30	5
32542	66.6667	46.875	83.3333	76.6667	41.6667	40	5
32543	70.8333	3.57143	87.5	73.3333	6.81818	20	5
32546	87.5	9.375	100	90	12.5	20	3
32547	79.1667	15.625	83.3333	86.6667	14.5833	25	6
32548	87.5	0	95.8333	88.3333	10.4167	20	4
32549	45.8333	3.125	87.5	69.6429	12.5	25	4
32550	87.5	3.125	95.8333	91.6667	8.33333	30	5
32551	91.6667	0	100	93.3333	2.08333	50	4
32553	66.6667	18.75	87.5	76.6667	25	25	4
32554	58.3333	59.375	70.8333	73.3333	54.1667	15	4
32555	70.8333	21.875	87.5	85	16.6667	15	4
32556	45.8333	21.875	70.8333	61.6667	27.0833	40	3
32557	87.5	9.375	100	91.6667	8.33333	30	5
32558	79.1667	9.375	95.8333	80	12.5	15	4
32559	66.6667	37.5	91.6667	76.6667	29.1667	25	6
32560	58.3333	31.25	95.8333	78.3333	33.3333	25	3
32561	29.1667	50	58.3333	46.6667	41.6667	10	5
32563	79.1667	12.5	66.6667	75	16.6667	40	3
32564	83.3333	15.625	83.3333	81.6667	27.0833	25	3
32565	62.5	15.625	95.8333	81.6667	27.0833	30	5
32566	54.1667	34.375	75	70	35.4167	45	5
32568	37.5	3.125	70.8333	68.3333	8.33333	40	7
32569	58.3333	21.875	79.1667	70	22.9167	45	3
32570	75	40.625	95.8333	81.6667	33.3333	30	5
32571	95.8333	6.25	100	98.3333	14.5833	30	3
32572	70.8333	15.625	83.3333	81.6667	14.5833	45	3
32574	91.6667	12.5	100	90	12.5	35	4
32575	79.1667	6.25	85	87.5	6.25	5	3
32576	95.8333	0	100	86.6667	2.08333	55	5
32577	70.8333	9.375	91.6667	75	12.5	35	3
32578	83.3333	3.125	87.5	88.3333	16.6667	15	5
32579	45.8333	25	95.8333	75	25	15	6
32581	66.6667	14.2857	54.1667	65	15.9091	15	5
32582	66.6667	0	95.8333	76.6667	2.08333	50	5
32583	75	0	100	78.3333	0	30	5
32584	95.8333	0	91.6667	91.6667	8.33333	30	5
32587	95.8333	0	45.8333	76.6667	0	55	5
32588	100	9.375	95.8333	95	6.25	20	5
32591	75	9.375	75	83.3333	16.6667	30	5
32592	75	7.14286	70.8333	70	6.81818	15	4
32593	62.5	15.625	62.5	66.6667	14.5833	30	5
32594	79.1667	15.625	83.3333	78.3333	18.75	15	4
32595	41.6667	28.125	79.1667	65	27.0833	5	5
32596	95.8333	0	91.6667	88.3333	12.5	20	3
32598	70	6.25	90	69.2308	16.6667	50	5
32599	83.3333	12.5	70.8333	69.6429	10.4167	55	5
32601	95.8333	34.375	91.6667	93.3333	37.5	35	5
32602	37.5	37.5	75	48.3333	37.5	15	4
32603	75	75	87.5	83.3333	75	50	5
32604	54.1667	28.125	62.5	60	31.25	30	5
32605	58.3333	34.375	58.3333	61.6667	33.3333	50	5
32606	58.3333	46.875	66.6667	66.6667	43.75	10	7
32607	75	28.125	87.5	78.3333	29.1667	30	5
32608	50	18.75	87.5	68.3333	20.8333	25	4
32609	62.5	18.75	95.8333	80	20.8333	35	5
32610	62.5	31.25	95.8333	76.6667	27.0833	10	5
32611	66.6667	15.625	83.3333	75	22.9167	20	3
32612	20.8333	25	75	55	22.9167	15	5
32613	54.1667	50	62.5	61.6667	41.6667	35	3
32614	58.3333	3.125	70.8333	73.3333	12.5	15	5
32615	62.5	6.25	95.8333	75	4.16667	20	4
32616	70.8333	15.625	58.3333	70	18.75	35	5
32618	75	18.75	70.8333	71.6667	20.8333	20	3
32619	75	25	75	80	20.8333	31.25	5
32620	83.3333	9.375	91.6667	83.3333	18.75	35	5
32621	62.5	12.5	70.8333	71.6667	14.5833	25	4
32622	75	28.125	100	88.3333	27.0833	25	4
32623	45.8333	25	79.1667	71.6667	25	30	5
32625	33.3333	28.125	75	60	22.9167	25	5
32626	79.1667	9.375	91.6667	83.3333	6.25	10	4
32627	79.1667	9.375	100	91.0714	14.5833	40	3
32628	75	15.625	87.5	80	14.5833	20	5
32629	66.6667	34.375	95.8333	76.6667	37.5	40	5
32630	83.3333	12.5	100	93.3333	16.6667	0	5
32631	91.6667	12.5	95.8333	93.3333	16.6667	45	5
32632	83.3333	21.875	100	91.6667	22.9167	10	4
32633	79.1667	28.125	91.6667	86.6667	33.3333	30	5
32634	91.6667	6.25	100	95	8.33333	20	5
32635	70.8333	25	70.8333	70	20.8333	35	5
32636	100	18.75	100	100	29.1667	10	4
32637	95.8333	31.25	66.6667	86.6667	33.3333	35	4
32638	50	31.25	66.6667	63.3333	25	30	8
32639	29.1667	28.125	83.3333	58.3333	27.0833	5	3
32640	91.6667	15.625	95.8333	90	18.75	20	3
32641	70.8333	6.25	79.1667	76.6667	10.4167	30	5
32642	83.3333	9.375	91.6667	85	10.4167	30	3
32643	70.8333	43.75	79.1667	78.3333	39.5833	35	6
32644	58.3333	15.625	58.3333	70	14.5833	40	5
32645	66.6667	3.125	83.3333	80	14.5833	20	4
32647	54.1667	37.5	91.6667	75	35.4167	40	5
32648	50	53.125	54.1667	53.3333	50	45	7
32649	37.5	12.5	62.5	51.6667	20.4545	15	5
32651	83.3333	25	75	82.1429	20.8333	25	5
32652	58.3333	43.75	70.8333	65	45.8333	50	5
32653	70.8333	56.25	70.8333	75	45.8333	65	5
32654	41.6667	37.5	50	55	33.3333	25	4
32655	70.8333	28.125	79.1667	78.3333	27.0833	40	5
32656	70.8333	37.5	87.5	80	31.25	25	3
32657	62.5	14.2857	50	61.6667	25	25	5
32658	20	18.75	45.8333	44.6429	16.6667	50	4
32659	45.8333	21.875	95.8333	71.6667	22.9167	20	5
32660	62.5	50	58.3333	70	43.1818	35	5
32662	54.1667	12.5	91.6667	80	16.6667	35	5
32664	75	6.25	100	86.6667	8.33333	35	5
32666	50	43.75	66.6667	60	41.6667	45	5
32667	83.3333	18.75	91.6667	85	27.0833	10	5
32668	33.3333	21.875	70.8333	50	25	20	5
32669	70.8333	18.75	95.8333	85	20.8333	20	4
32670	66.6667	25	70.8333	71.6667	22.9167	65	3
32671	41.6667	18.75	75	60	20.8333	20	5
32672	54.1667	18.75	85	63.3333	18.75	20	5
32675	87.5	40.625	91.6667	85	36.3636	20	3
32676	54.1667	12.5	79.1667	75	20.8333	45	3
32677	20.8333	3.125	95.8333	55	6.25	5	4
32678	91.6667	37.5	91.6667	93.3333	41.6667	20	5
32683	45.8333	34.375	95.8333	75	45.8333	20	3
32685	54.1667	0	95.8333	75	10.4167	20	4
32686	80	53.125	83.3333	80.3571	50	35	3
32687	66.6667	6.25	95.8333	75	4.16667	10	5
32688	66.6667	9.375	91.6667	81.6667	12.5	45	5
32689	87.5	0	100	91.6667	0	25	4
32690	70.8333	18.75	87.5	58.3333	16.6667	10	4
32691	79.1667	21.875	70.8333	81.6667	22.9167	50	5
32692	55	12.5	87.5	71.4286	25	30	5
32693	83.3333	21.875	91.6667	83.3333	27.0833	55	6
32694	54.1667	37.5	75	65	33.3333	45	4
32695	70.8333	6.25	100	86.6667	12.5	10	5
32696	54.1667	25	87.5	66.6667	22.9167	20	3
32698	70.8333	28.125	87.5	80.3571	33.3333	25	4
32699	62.5	15.625	66.6667	60.7143	22.9167	37.5	5
32700	58.3333	39.2857	87.5	81.6667	36.3636	10	5
32702	91.6667	9.375	100	93.3333	8.33333	45	3
32703	75	37.5	87.5	81.6667	35.4167	40	5
32704	79.1667	12.5	83.3333	81.6667	8.33333	30	4
32705	45.8333	31.25	66.6667	70	29.1667	40	3
32706	70.8333	21.875	75	73.3333	27.0833	35	4
32707	95.8333	15.625	100	91.6667	20.8333	45	5
32708	58.3333	21.875	91.6667	80	22.9167	15	4
32710	83.3333	3.125	100	86.6667	8.33333	45	6
32711	70.8333	9.375	75	75	20.8333	25	3
32712	37.5	9.375	70.8333	53.3333	10.4167	35	5
32713	50	34.375	41.6667	53.3333	37.5	30	4
32715	45.8333	15.625	91.6667	61.6667	18.75	30	5
32716	80	6.25	87.5	80.3571	10.4167	15	3
32717	58.3333	37.5	79.1667	75	37.5	20	5
32719	66.6667	34.375	75	73.3333	27.0833	30	3
32720	83.3333	21.875	62.5	81.6667	18.75	75	4
32721	100	0	100	96.6667	6.25	10	5
32723	62.5	53.125	79.1667	71.6667	50	35	5
32724	66.6667	18.75	79.1667	71.6667	20.8333	20	5
32725	58.3333	31.25	95.8333	81.6667	33.3333	25	6
32726	79.1667	31.25	95.8333	85	29.1667	30	5
32727	87.5	9.375	83.3333	86.6667	8.33333	35	5
32728	66.6667	6.25	87.5	78.3333	12.5	35	5
32729	70.8333	3.125	80	76.7857	4.16667	15	5
32730	87.5	3.125	83.3333	88.3333	12.5	35	5
32731	75	21.875	91.6667	83.3333	25	20	3
32732	41.6667	31.25	66.6667	66.6667	31.25	40	4
32733	66.6667	28.125	75	66.6667	29.1667	30	6
32735	66.6667	9.375	79.1667	75	14.5833	30	4
32736	79.1667	0	91.6667	83.3333	8.33333	15	5
32737	54.1667	21.4286	79.1667	70	29.5455	30	5
32738	37.5	31.25	75	58.3333	29.1667	15	4
32739	91.6667	31.25	79.1667	81.6667	31.25	45	7
32740	62.5	18.75	75	78.3333	35.4167	10	5
32741	70.8333	21.4286	70.8333	66.6667	27.2727	31.25	3
32742	37.5	34.375	87.5	55	35.4167	20	3
32743	75	28.125	79.1667	81.6667	22.9167	20	3
32744	50	25	79.1667	65	22.9167	35	5
32745	66.6667	0	83.3333	76.6667	0	35	5
32746	58.3333	37.5	79.1667	75	37.5	25	7
32747	66.6667	9.375	83.3333	75	12.5	35	4
32748	41.6667	50	70.8333	58.3333	39.5833	10	3
32749	50	9.375	83.3333	69.6429	12.5	25	3
32750	66.6667	40.625	66.6667	65	41.6667	65	5
32751	62.5	3.125	95.8333	76.6667	10.4167	30	2
32753	100	12.5	100	95	16.6667	35	4
32754	58.3333	12.5	95	75	18.75	20	5
32755	83.3333	3.125	83.3333	86.6667	8.33333	15	5
32759	75	18.75	70.8333	78.3333	16.6667	20	5
32760	45.8333	37.5	75	61.6667	31.25	20	5
32761	100	6.25	100	100	8.33333	25	4
32762	87.5	12.5	87.5	83.3333	8.33333	15	4
32764	87.5	3.125	100	95	4.16667	25	3
32765	91.6667	6.25	100	96.6667	6.25	20	4
32767	95.8333	12.5	100	96.6667	14.5833	50	6
32768	62.5	43.75	75	68.3333	39.5833	35	5
32770	54.1667	18.75	83.3333	73.3333	18.75	40	4
32771	95.8333	15.625	100	96.6667	16.6667	25	5
32773	91.6667	12.5	91.6667	95	14.5833	45	3
32774	45.8333	25	87.5	66.6667	27.0833	10	3
32775	62.5	9.375	83.3333	71.6667	8.33333	15	4
32776	75	6.25	95.8333	85	6.25	35	5
32777	70.8333	18.75	87.5	76.6667	20.8333	40	5
32778	79.1667	40.625	91.6667	90	33.3333	65	5
32780	75	6.25	79.1667	75	14.5833	25	4
32782	58.3333	9.375	95.8333	76.6667	16.6667	65	4
32783	54.1667	3.125	87.5	71.6667	6.25	25	5
32784	12.5	18.75	83.3333	50	20.8333	5	5
32789	70.8333	15.625	79.1667	78.3333	16.6667	45	5
32790	62.5	6.25	95	78.5714	14.5833	20	4
32791	65	18.75	87.5	80.7692	20.8333	15	5
32792	62.5	15.625	79.1667	73.3333	20.8333	31.25	5
32793	75	15.625	75	80	22.9167	25	6
32794	87.5	6.25	91.6667	86.6667	16.6667	25	5
32795	79.1667	0	79.1667	80	0	30	4
32800	87.5	0	83.3333	81.6667	2.08333	55	3
32802	79.1667	15.625	95.8333	90	25	10	5
32804	37.5	34.375	91.6667	68.3333	35.4167	20	4
32805	70.8333	9.375	91.6667	75	14.5833	15	5
32806	79.1667	12.5	100	91.6667	13.6364	20	3
32807	70.8333	18.75	95.8333	83.3333	27.0833	25	3
32808	75	6.25	91.6667	85	6.25	30	3
32809	45.8333	28.125	75	70	27.0833	25	6
32810	75	15.625	83.3333	80	22.9167	25	3
32811	70.8333	25	95.8333	85	31.25	10	5
32812	50	21.875	87.5	66.6667	25	25	4
32813	75	31.25	66.6667	78.3333	31.25	35	4
32815	33.3333	21.875	91.6667	58.3333	20.8333	12.5	4
32817	70.8333	6.25	95.8333	78.3333	16.6667	40	4
32819	79.1667	28.125	95.8333	86.6667	25	45	5
32820	41.6667	43.75	95.8333	71.6667	37.5	30	5
32821	45.8333	9.375	83.3333	66.6667	20.8333	15	5
32823	58.3333	28.125	83.3333	70	27.0833	20	5
32824	83.3333	14.2857	87.5	81.6667	25	45	4
32825	62.5	15.625	95.8333	76.6667	18.75	15	4
32826	62.5	43.75	91.6667	78.3333	35.4167	25	3
32827	75	12.5	95.8333	88.3333	18.75	5	4
32829	75	12.5	75	73.3333	14.5833	40	5
32830	70.8333	9.375	75	75	10.4167	30	5
32831	66.6667	50	70.8333	70	45.8333	30	5
32832	79.1667	31.25	87.5	86.6667	34.0909	35	4
32837	83.3333	21.875	91.6667	91.6667	22.9167	20	4
32838	41.6667	3.125	95.8333	63.3333	4.16667	15	5
32839	58.3333	15.625	100	80	10.4167	40	3
32840	70.8333	31.25	87.5	78.3333	29.1667	35	4
32841	41.6667	21.875	79.1667	63.3333	22.9167	10	3
32843	58.3333	25	75	70	22.9167	15	3
32844	79.1667	21.875	95.8333	83.3333	20.8333	10	4
32845	62.5	21.875	100	81.6667	25	25	3
32846	62.5	6.25	83.3333	78.3333	16.6667	30	5
32847	45.8333	12.5	75	63.3333	18.75	15	5
32848	4.16667	46.875	87.5	40	47.9167	0	5
32850	91.6667	18.75	80	87.5	18.1818	15	3
32852	58.3333	6.25	95.8333	76.6667	10.4167	25	5
32853	75	40.625	79.1667	78.3333	37.5	35	5
32854	54.1667	59.375	95.8333	80	45.8333	20	5
32855	66.6667	15.625	79.1667	78.3333	14.5833	35	5
32856	79.1667	28.125	95.8333	85	37.5	18.75	5
32857	50	18.75	100	78.3333	25	10	5
32858	54.1667	9.375	100	73.3333	18.75	20	5
32859	33.3333	28.125	87.5	61.6667	20.8333	15	5
32860	54.1667	6.25	83.3333	70	6.25	30	5
32861	41.6667	15.625	45.8333	53.3333	16.6667	15	5
32864	50	21.875	95.8333	76.6667	25	15	5
32865	25	40.625	87.5	63.3333	47.9167	45	6
32866	58.3333	50	54.1667	60	39.5833	65	6
32867	62.5	18.75	70.8333	68.3333	25	55	4
32868	66.6667	59.375	70.8333	73.3333	58.3333	50	4
32869	45.8333	3.125	75	60	6.25	20	4
32870	95.8333	9.375	95.8333	95	10.4167	35	5
32871	83.3333	9.375	58.3333	70	12.5	40	3
32872	100	40.625	100	96.6667	35.4167	35	5
32873	75	12.5	83.3333	78.3333	16.6667	45	5
32874	66.6667	59.375	91.6667	75	47.9167	40	5
32875	66.6667	25	91.6667	76.6667	25	40	5
32877	95.8333	62.5	100	93.3333	45.8333	40	5
32878	75	46.875	95.8333	86.6667	50	55	5
32879	50	34.375	79.1667	70	39.5833	55	5
32880	16.6667	50	95.8333	53.3333	41.6667	15	4
32881	37.5	50	66.6667	51.6667	50	35	4
32882	58.3333	25	87.5	78.3333	22.9167	10	4
32884	66.6667	28.125	95.8333	83.3333	39.5833	10	3
32885	83.3333	12.5	95.8333	90	18.75	35	5
32886	45.8333	12.5	95.8333	71.6667	14.5833	25	5
32887	41.6667	28.5714	58.3333	56.6667	38.6364	20	3
32888	83.3333	0	100	85	4.16667	15	4
32889	70.8333	9.375	66.6667	73.3333	14.5833	30	6
32891	75	25	100	86.6667	20.8333	15	5
32892	58.3333	6.25	87.5	70	18.75	20	3
32893	62.5	53.125	58.3333	65	47.9167	65	5
32894	87.5	15.625	91.6667	91.6667	18.75	50	5
32895	91.6667	9.375	91.6667	93.3333	16.6667	15	5
32896	62.5	28.125	75	68.3333	33.3333	15	4
32897	25	12.5	75	53.3333	16.6667	20	4
32898	83.3333	56.25	83.3333	86.6667	45.8333	40	5
32899	62.5	40.625	79.1667	78.3333	41.6667	35	6
32901	54.1667	28.125	100	76.6667	31.25	10	5
32902	62.5	9.375	100	80	10.4167	0	5
32903	58.3333	28.125	66.6667	63.3333	29.1667	20	5
32904	66.6667	15.625	79.1667	76.6667	25	25	4
32905	70.8333	15.625	91.6667	81.6667	20.8333	55	5
32906	70.8333	15.625	87.5	76.6667	18.75	40	4
32907	62.5	21.875	87.5	73.3333	22.9167	20	5
32908	91.6667	12.5	91.6667	91.6667	18.75	45	4
32909	83.3333	6.25	79.1667	85	10.4167	35	4
32911	75	9.375	95.8333	85.7143	16.6667	15	6
32912	54.1667	21.875	70.8333	68.3333	22.9167	25	5
32913	45.8333	43.75	79.1667	63.3333	45.8333	35	7
32914	54.1667	18.75	83.3333	71.6667	22.9167	35	5
32915	83.3333	9.375	87.5	80	6.25	35	4
32916	66.6667	15.625	70.8333	78.3333	25	35	5
32917	66.6667	18.75	87.5	80	27.0833	55	4
32918	25	37.5	100	63.3333	45.8333	5	3
32919	54.1667	3.125	58.3333	61.6667	18.75	10	7
32920	95.8333	7.14286	70.8333	88.3333	4.54545	50	4
32922	79.1667	25	75	76.6667	22.9167	45	5
32923	70.8333	21.875	79.1667	78.3333	22.9167	25	5
32924	50	34.375	79.1667	65	27.0833	20	5
32925	54.1667	59.375	83.3333	70	47.9167	10	3
32927	83.3333	25	79.1667	81.6667	29.1667	25	5
32928	50	25	20.8333	48.3333	20.8333	10	5
32929	79.1667	15.625	70.8333	78.3333	14.5833	25	4
32930	20.8333	18.75	91.6667	56.6667	20.8333	20	4
32931	75	28.125	91.6667	76.6667	33.3333	30	5
32932	62.5	34.375	95.8333	83.3333	35.4167	10	5
32934	50	18.75	87.5	71.6667	25	10	5
32935	29.1667	18.75	87.5	63.3333	35.4167	20	5
32937	29.1667	12.5	100	68.3333	16.6667	0	5
32938	50	6.25	83.3333	70	8.33333	15	4
32939	75	18.75	62.5	63.3333	25	40	6
32940	50	40.625	87.5	75	35.4167	35	6
32941	16.6667	21.875	79.1667	48.3333	29.1667	10	3
32942	79.1667	6.25	95.8333	90	4.16667	40	5
32943	62.5	6.25	87.5	73.3333	9.09091	35	3
32944	66.6667	50	79.1667	71.6667	55	55	3
32945	37.5	46.875	70.8333	56.6667	45.8333	10	5
32946	50	12.5	91.6667	75	20.8333	45	6
32947	45.8333	21.875	79.1667	63.3333	25	15	6
32948	45.8333	18.75	91.6667	69.6429	25	30	5
32949	54.1667	46.875	83.3333	75	39.5833	45	4
32950	79.1667	3.125	100	81.6667	12.5	20	4
32951	95.8333	28.125	95.8333	95	22.9167	55	3
32952	54.1667	9.375	83.3333	68.3333	16.6667	20	9
32953	83.3333	0	100	91.6667	0	35	5
32955	50	31.25	70.8333	70	29.1667	25	5
32957	58.3333	34.375	66.6667	66.6667	35.4167	35	4
32961	75	25	83.3333	73.3333	29.1667	25	5
32962	45.8333	9.375	83.3333	65	16.6667	20	4
32964	79.1667	28.125	95.8333	85	25	10	4
32966	54.1667	6.25	83.3333	65	12.5	25	4
32967	45.8333	15.625	95.8333	61.6667	18.75	15	2
32968	41.6667	6.25	91.6667	71.6667	10.4167	20	3
32969	66.6667	28.125	95.8333	81.6667	27.0833	25	6
32970	66.6667	21.875	70.8333	71.6667	27.0833	45	4
32971	75	25	70.8333	66.6667	20.8333	25	3
32972	95.8333	3.125	95.8333	91.6667	2.08333	40	5
32973	75	21.875	75	80	45.8333	50	3
32974	54.1667	31.25	91.6667	73.3333	37.5	10	5
32975	66.6667	28.125	79.1667	78.3333	29.1667	45	5
32976	50	28.125	83.3333	71.6667	43.75	45	7
32977	85	3.125	79.1667	75	13.6364	25	5
32979	75	31.25	83.3333	78.5714	25	20	3
32983	79.1667	25	100	91.6667	22.7273	40	4
32985	37.5	6.25	100	63.3333	4.16667	10	3
32986	70.8333	53.125	66.6667	71.6667	47.9167	50	5
32987	66.6667	25	75	73.3333	22.9167	45	3
32989	25	34.375	54.1667	33.3333	35.4167	5	2
32994	50	28.125	95.8333	71.6667	27.0833	25	4
32995	25	15.625	87.5	60	20.8333	5	4
32996	58.3333	43.75	100	75	37.5	15	3
32997	70.8333	25	91.6667	83.3333	22.9167	30	4
32999	87.5	0	100	95	6.25	10	4
33000	66.6667	18.75	75	76.6667	35.4167	30	3
33002	50	9.375	83.3333	73.3333	18.75	15	3
33003	37.5	43.75	66.6667	55	39.5833	20	5
33005	54.1667	31.25	87.5	70	29.1667	0	6
33006	58.3333	28.125	66.6667	63.3333	29.1667	20	5
33008	70.8333	34.375	62.5	75	41.6667	45	6
33009	66.6667	37.5	75	81.6667	39.5833	35	5
33010	79.1667	12.5	75	83.3333	20.8333	40	5
33014	41.6667	18.75	87.5	71.6667	14.5833	20	5
33015	70.8333	34.375	95.8333	81.6667	29.1667	15	5
33016	16.6667	6.25	58.3333	51.6667	14.5833	20	3
33017	66.6667	43.75	79.1667	70	33.3333	35	4
33018	58.3333	31.25	66.6667	61.6667	41.6667	25	5
33019	70.8333	0	95.8333	88.3333	10.4167	5	5
33021	8.33333	28.125	62.5	33.3333	27.0833	12.5	3
33022	45.8333	62.5	66.6667	65	54.1667	30	5
33023	50	31.25	100	75	33.3333	20	3
33024	79.1667	43.75	91.6667	85	33.3333	50	3
33025	66.6667	18.75	50	65	22.9167	40	4
33026	75	25	100	90	29.1667	45	3
33027	70.8333	28.125	79.1667	78.3333	29.1667	50	5
33030	62.5	25	95.8333	80	33.3333	20	5
33031	58.3333	34.375	62.5	68.3333	35.4167	20	6
33032	66.6667	9.375	91.6667	80	14.5833	15	3
33034	45.8333	28.125	100	70	25	25	4
33035	62.5	15.625	91.6667	76.6667	20.8333	20	6
33036	75	25	95.8333	86.6667	25	25	6
33037	33.3333	37.5	70.8333	53.3333	35.4167	40	5
33038	50	28.5714	50	61.6667	31.8182	40	3
33039	37.5	18.75	91.6667	66.6667	18.75	35	5
33040	30	0	79.1667	67.8571	10.4167	50	5
33041	75	34.375	95.8333	78.3333	35.4167	10	3
33043	50	0	79.1667	63.3333	8.33333	15	9
33044	70.8333	21.875	62.5	70	25	25	5
33046	62.5	3.125	91.6667	80	2.08333	5	5
33047	75	3.125	95.8333	86.6667	8.33333	15	4
33048	75	31.25	83.3333	81.6667	29.1667	20	4
33049	75	3.125	100	80	10.4167	40	5
33051	54.1667	50	91.6667	76.6667	54.1667	20	5
33054	66.6667	10.7143	100	86.6667	25	25	5
33055	50	12.5	83.3333	73.3333	16.6667	20	5
33056	58.3333	37.5	66.6667	61.6667	33.3333	30	5
33057	79.1667	9.375	79.1667	86.6667	10.4167	45	4
33058	20.8333	3.125	79.1667	50	10.4167	20	5
33060	62.5	25	70.8333	71.6667	25	40	4
33061	45.8333	53.125	75	63.3333	47.9167	25	4
33062	83.3333	0	100	85	8.33333	25	5
33063	79.1667	25	100	83.3333	29.1667	30	5
33064	70.8333	6.25	83.3333	80	10.4167	5	5
33065	79.1667	28.125	83.3333	78.3333	20.8333	20	5
33066	83.3333	9.375	100	85	10.4167	25	3
33068	16.6667	34.375	83.3333	48.3333	35.4167	30	5
33070	62.5	53.125	54.1667	61.6667	39.5833	55	6
33071	66.6667	9.375	95.8333	76.6667	6.25	15	4
33072	87.5	6.25	87.5	85	14.5833	35	5
33073	62.5	43.75	87.5	75	47.9167	30	4
33075	45.8333	15.625	83.3333	70	18.75	10	4
33076	45.8333	34.375	70.8333	63.3333	31.25	10	3
33078	54.1667	28.125	62.5	66.6667	25	40	5
33079	41.6667	56.25	91.6667	63.3333	50	25	4
33081	62.5	12.5	79.1667	71.6667	20.8333	15	4
33083	54.1667	18.75	91.6667	75	25	10	4
33088	70.8333	18.75	87.5	80	18.75	25	3
33090	70.8333	12.5	79.1667	73.3333	16.6667	20	4
33091	45.8333	21.875	75	70	22.9167	20	5
33092	41.6667	3.125	95.8333	60	25	5	3
33094	62.5	18.75	83.3333	75	16.6667	35	4
33097	60	12.5	95	67.3077	22.9167	15	5
33098	45.8333	28.125	70.8333	56.6667	31.25	20	4
33099	66.6667	15.625	66.6667	75	14.5833	10	3
33102	75	18.75	87.5	80	18.75	40	5
33103	33.3333	12.5	75	56.6667	18.75	25	5
33105	83.3333	25	91.6667	86.6667	20.8333	10	5
33108	62.5	31.25	100	78.3333	29.1667	20	5
33109	83.3333	9.375	75	81.6667	10.4167	25	3
33111	54.1667	12.5	79.1667	75	25	20	5
33113	70.8333	12.5	87.5	81.6667	16.6667	30	3
33114	62.5	59.375	66.6667	65	58.3333	50	5
33116	91.6667	0	100	93.3333	6.25	25	5
33117	62.5	31.25	54.1667	68.3333	29.1667	20	5
33118	70.8333	12.5	100	86.6667	12.5	25	5
33119	50	28.125	87.5	68.3333	27.0833	25	5
33120	79.1667	0	83.3333	83.3333	2.08333	35	3
33121	33.3333	25	79.1667	55	22.7273	20	4
33122	83.3333	10.7143	100	88.3333	18.1818	55	3
33123	70.8333	0	100	86.6667	10.4167	20	3
33124	66.6667	21.875	75	63.3333	22.9167	25	4
33126	75	15.625	75	75	12.5	30	5
33127	66.6667	12.5	75	76.6667	16.6667	15	5
33128	25	53.125	30	30.7692	43.75	0	3
33131	58.3333	21.875	83.3333	75	27.0833	30	5
33132	70.8333	25	95.8333	81.6667	27.0833	35	5
33133	70.8333	12.5	95.8333	83.3333	14.5833	25	4
33135	66.6667	21.875	58.3333	71.6667	22.9167	45	4
33138	66.6667	28.125	83.3333	75	31.25	20	3
33139	50	37.5	83.3333	73.3333	37.5	20	5
33141	33.3333	50	79.1667	58.3333	52.0833	30	5
33142	87.5	0	100	90	12.5	15	5
33143	54.1667	12.5	91.6667	73.3333	14.5833	20	5
33144	58.3333	40.625	79.1667	61.6667	37.5	45	5
33145	54.1667	25	41.6667	58.3333	25	45	5
33146	83.3333	12.5	91.6667	88.3333	22.9167	45	7
33147	75	3.125	91.6667	80	10.4167	40	3
33148	83.3333	6.25	100	85	14.5833	40	5
33149	62.5	31.25	62.5	66.6667	37.5	65	5
33150	70.8333	34.375	79.1667	73.3333	29.1667	20	5
33152	70.8333	21.875	83.3333	81.6667	18.75	30	5
33153	29.1667	25	79.1667	60	29.1667	30	5
33154	62.5	50	83.3333	78.3333	45.8333	20	4
33155	41.6667	68.75	79.1667	65	58.3333	25	5
33156	50	42.8571	95.8333	66.6667	36.3636	50	4
33157	83.3333	12.5	100	90	14.5833	40	5
33158	45.8333	3.125	87.5	61.6667	2.08333	0	5
33159	75	6.25	95.8333	83.3333	18.75	20	4
33160	45.8333	25	83.3333	71.6667	35.4167	25	3
33161	41.6667	25	79.1667	58.3333	25	35	5
33162	66.6667	9.375	87.5	78.3333	18.75	25	5
33163	45.8333	9.375	66.6667	63.3333	12.5	20	3
33164	75	21.875	95.8333	80	25	25	5
33165	83.3333	21.875	95.8333	91.6667	14.5833	40	5
33167	70.8333	3.125	100	85	20.8333	35	4
33168	95.8333	3.125	100	98.3333	4.16667	45	3
33169	66.6667	18.75	95.8333	76.6667	16.6667	20	5
33172	50	40.625	62.5	63.3333	37.5	35	3
33173	79.1667	6.25	91.6667	81.6667	4.16667	20	5
33174	75	40.625	83.3333	76.6667	43.75	65	7
33175	91.6667	6.25	83.3333	81.6667	8.33333	40	6
33177	45.8333	53.125	95.8333	73.3333	52.0833	40	5
33178	62.5	46.875	83.3333	78.3333	45.8333	20	5
33179	54.1667	15.625	83.3333	75	16.6667	25	5
33182	79.1667	9.375	83.3333	67.8571	10.4167	35	5
33187	70.8333	31.25	95.8333	81.6667	25	15	5
33188	75	3.125	91.6667	81.6667	4.16667	43.75	5
33189	41.6667	18.75	62.5	50	22.9167	18.75	5
33190	83.3333	34.375	83.3333	81.6667	33.3333	45	3
33191	50	34.375	79.1667	58.3333	31.25	10	5
33192	70.8333	28.125	79.1667	78.3333	22.9167	40	4
33194	66.6667	25	79.1667	73.3333	27.2727	25	7
33195	70.8333	40.625	95.8333	76.6667	39.5833	35	5
33196	75	34.375	66.6667	68.3333	29.1667	30	5
33197	62.5	18.75	91.6667	78.3333	14.5833	20	5
33198	54.1667	6.25	70.8333	65	10.4167	20	6
33199	58.3333	18.75	50	65	22.9167	30	3
33200	79.1667	12.5	87.5	85	18.75	35	3
33201	83.3333	0	95.8333	90	4.16667	30	5
33202	91.6667	28.125	95.8333	91.6667	20.8333	40	5
33203	66.6667	0	100	71.6667	6.25	5	3
33204	75	21.875	91.6667	78.3333	16.6667	50	5
33205	66.6667	15.625	83.3333	85	18.75	25	5
33207	70.8333	25	83.3333	78.3333	29.1667	35	4
33208	70.8333	12.5	83.3333	78.3333	16.6667	15	4
33209	70.8333	18.75	75	75	29.1667	35	5
33210	54.1667	28.125	100	75	27.0833	15	4
33211	58.3333	21.875	91.6667	78.3333	25	20	3
33212	62.5	31.25	79.1667	76.6667	29.1667	30	4
33213	83.3333	3.125	100	86.6667	14.5833	10	4
33217	41.6667	6.25	100	63.3333	16.6667	15	4
33218	75	15.625	75	78.3333	20.8333	20	5
33219	45.8333	53.125	91.6667	66.6667	41.6667	15	5
33220	50	15.625	83.3333	66.6667	20.8333	15	4
33221	91.6667	12.5	95.8333	96.6667	12.5	35	5
33222	50	34.375	75	70	35.4167	40	4
33224	91.6667	25	75	88.3333	27.0833	25	5
33228	50	43.75	91.6667	73.3333	39.5833	25	5
33229	29.1667	25	62.5	61.6667	31.25	25	5
33230	70.8333	12.5	83.3333	76.6667	22.9167	10	5
33232	62.5	6.25	100	78.3333	16.6667	15	3
33234	58.3333	31.25	79.1667	76.6667	33.3333	40	5
33236	79.1667	12.5	87.5	81.6667	12.5	30	4
33237	91.6667	12.5	91.6667	88.3333	16.6667	20	4
33240	50	31.25	100	78.3333	33.3333	10	3
33242	87.5	25	79.1667	83.3333	29.1667	35	3
33243	66.6667	43.75	100	82.1429	40.9091	10	5
33244	62.5	31.25	91.6667	83.3333	33.3333	45	5
33246	58.3333	34.375	62.5	66.6667	29.1667	35	5
33249	58.3333	59.375	70.8333	73.3333	47.9167	30	5
33251	58.3333	43.75	70.8333	63.3333	39.5833	35	4
33252	75	15.625	75	78.3333	12.5	45	5
33253	37.5	18.75	87.5	61.6667	25	20	5
33254	54.1667	12.5	91.6667	75	18.75	35	5
33255	75	25	62.5	80	22.9167	35	4
33256	75	6.25	100	85	10.4167	20	4
33257	58.3333	12.5	87.5	76.6667	20.8333	25	5
33258	70.8333	12.5	100	81.6667	14.5833	20	5
33259	37.5	40.625	87.5	66.6667	33.3333	25	1
33260	37.5	53.125	79.1667	58.3333	47.9167	25	4
33261	58.3333	18.75	100	76.6667	20.8333	5	4
33262	66.6667	18.75	75	76.6667	16.6667	20	5
33263	83.3333	25	75	80	31.25	35	2
33265	58.3333	12.5	95.8333	75	12.5	10	3
33266	58.3333	25	54.1667	65	33.3333	15	5
33269	58.3333	18.75	87.5	80	29.1667	15	5
33270	45.8333	12.5	91.6667	68.3333	14.5833	25	5
33271	91.6667	25	91.6667	93.3333	22.9167	55	6
33275	75	12.5	95.8333	85	14.5833	25	3
33276	54.1667	3.125	66.6667	73.3333	6.25	15	3
33277	91.6667	6.25	87.5	88.3333	6.25	35	4
33278	70.8333	31.25	75	78.5714	39.5833	60	3
33279	87.5	28.125	87.5	81.6667	25	70	4
33280	87.5	18.75	95.8333	91.6667	18.75	40	4
33281	91.6667	28.125	45.8333	80	31.25	25	6
33282	75	6.25	95.8333	86.6667	6.25	20	5
33285	66.6667	37.5	95.8333	81.6667	37.5	35	5
33288	50	43.75	95.8333	80	35.4167	10	5
33289	50	65.625	79.1667	68.3333	58.3333	10	5
33290	62.5	9.375	87.5	71.6667	18.75	5	7
33292	37.5	21.875	87.5	70	29.1667	10	4
33293	50	37.5	83.3333	65	45.8333	45	4
33295	79.1667	12.5	79.1667	73.3333	8.33333	30	4
33296	58.3333	21.875	100	78.3333	29.1667	5	5
33297	41.6667	31.25	91.6667	66.6667	31.25	25	5
33298	41.6667	9.375	87.5	65	10.4167	15	3
33299	87.5	12.5	87.5	80	10.4167	40	5
33300	54.1667	40.625	87.5	68.3333	43.75	50	5
33301	66.6667	6.25	91.6667	71.6667	10.4167	35	5
33302	66.6667	6.25	91.6667	80	6.25	30	5
33304	70.8333	34.375	79.1667	78.3333	33.3333	20	5
33305	62.5	12.5	75	71.6667	20.8333	40	5
33306	62.5	65.625	91.6667	80	62.5	15	5
33307	58.3333	50	66.6667	65	37.5	35	5
33308	37.5	3.125	79.1667	58.3333	10.4167	20	3
33309	70.8333	21.875	83.3333	78.3333	27.0833	20	3
33310	45.8333	21.875	83.3333	68.3333	25	10	3
33311	75	9.375	83.3333	81.6667	14.5833	40	4
33312	83.3333	18.75	75	78.3333	22.9167	55	4
33314	54.1667	21.875	95.8333	73.3333	29.1667	31.25	5
33316	66.6667	15.625	95.8333	76.6667	20.8333	20	5
33317	45.8333	6.25	83.3333	68.3333	6.25	20	5
33318	45.8333	25	87.5	63.3333	27.0833	10	5
33319	45.8333	15.625	75	68.3333	27.0833	30	5
33320	62.5	37.5	58.3333	63.3333	43.75	35	5
33321	54.1667	21.875	95.8333	80	20.8333	25	5
33322	83.3333	12.5	83.3333	81.6667	14.5833	50	7
33323	75	0	79.1667	78.3333	2.08333	20	6
33324	20.8333	37.5	66.6667	55	37.5	15	4
33325	50	34.375	100	70	29.1667	15	5
33326	70.8333	21.875	91.6667	81.6667	29.1667	20	4
33327	41.6667	25	83.3333	71.6667	29.1667	35	5
33328	50	21.875	87.5	68.3333	25	35	5
33330	62.5	31.25	100	80	27.0833	35	5
33332	54.1667	28.125	91.6667	75	27.0833	30	5
33334	33.3333	6.25	95.8333	65	12.5	20	5
33335	79.1667	28.125	91.6667	86.6667	31.25	40	3
33336	58.3333	46.875	62.5	61.6667	45.8333	30	4
33338	45.8333	15.625	83.3333	65	18.75	20	4
33339	33.3333	40.625	91.6667	63.3333	33.3333	40	5
33340	29.1667	18.75	95.8333	58.3333	22.9167	20	4
33341	83.3333	34.375	91.6667	90	31.25	25	5
33343	70.8333	53.125	87.5	78.3333	50	25	4
33344	66.6667	31.25	87.5	80	35.4167	25	5
33345	54.1667	43.75	79.1667	75	35.4167	30	5
33346	70.8333	28.125	75	70	29.1667	25	5
33347	83.3333	12.5	100	90	12.5	45	5
33348	41.6667	42.8571	75	65	43.1818	35	3
33349	83.3333	6.25	91.6667	88.3333	31.25	30	4
33350	29.1667	37.5	62.5	56.6667	39.5833	50	5
33352	33.3333	31.25	91.6667	63.3333	31.8182	30	5
33353	37.5	31.25	95.8333	71.6667	33.3333	18.75	4
33354	37.5	34.375	87.5	70	33.3333	10	5
33355	75	21.875	100	90	31.25	20	5
33356	8.33333	46.875	45.8333	36.6667	47.9167	0	5
33357	45	53.125	91.6667	75	56.25	35	4
33358	66.6667	25	95.8333	80	31.25	15	3
33361	37.5	15.625	80	58.9286	18.75	20	4
33362	87.5	18.75	100	93.3333	31.25	20	3
33364	37.5	21.875	79.1667	66.6667	22.9167	15	5
33367	66.6667	25	45.8333	61.6667	29.1667	45	3
33368	70.8333	31.25	83.3333	83.3333	29.1667	50	5
33369	20.8333	15.625	100	58.3333	18.75	25	4
33370	87.5	25	87.5	83.3333	16.6667	30	5
33371	41.6667	25	91.6667	66.6667	25	10	5
33373	62.5	25	75	65	25	20	5
33375	75	31.25	91.6667	85	27.0833	45	4
33377	50	21.875	100	66.6667	27.0833	45	5
33378	54.1667	0	91.6667	71.6667	6.25	30	5
33379	66.6667	46.875	75	71.6667	37.5	25	5
33380	16.6667	31.25	95.8333	55	29.1667	15	5
33381	37.5	37.5	66.6667	55	29.5455	55	5
33382	83.3333	9.375	87.5	86.6667	6.25	30	4
33385	41.6667	40.625	66.6667	60	35.4167	20	4
33386	37.5	56.25	91.6667	65	52.0833	10	3
33387	75	15.625	75	71.6667	14.5833	20	5
33388	66.6667	65.625	58.3333	66.6667	58.3333	55	5
33390	33.3333	25	75	60	33.3333	18.75	5
33391	66.6667	21.875	91.6667	80	22.9167	35	4
33394	70.8333	50	66.6667	71.6667	41.6667	45	3
33396	50	18.75	79.1667	68.3333	29.1667	15	4
33397	60	21.875	75	75	27.0833	60	2
33398	54.1667	28.125	66.6667	63.3333	33.3333	25	5
33399	75	21.875	87.5	83.3333	25	40	5
33400	54.1667	43.75	75	71.6667	43.75	50	3
33401	91.6667	9.375	95.8333	95	14.5833	55	5
33402	62.5	25	87.5	75	29.1667	20	5
33403	62.5	12.5	75	68.3333	14.5833	20	5
33404	62.5	25	83.3333	61.6667	35.4167	15	5
33407	58.3333	6.25	79.1667	71.6667	10.4167	15	5
33408	58.3333	12.5	95.8333	73.3333	20.8333	15	5
33410	62.5	34.375	87.5	78.3333	31.25	15	5
33411	66.6667	25	83.3333	78.3333	35.4167	30	4
33412	62.5	3.125	91.6667	78.3333	10.4167	40	5
33413	83.3333	6.25	79.1667	76.6667	10.4167	25	4
33414	54.1667	12.5	91.6667	71.6667	14.5833	25	3
33415	54.1667	21.875	95.8333	71.4286	20.8333	25	4
33416	41.6667	25	100	71.6667	25	45	5
33417	20.8333	9.375	79.1667	51.6667	14.5833	10	3
33418	95.8333	3.125	91.6667	91.6667	6.25	30	5
33420	55	31.25	75	73.2143	37.5	15	4
33421	54.1667	53.125	79.1667	63.3333	52.0833	60	9
33422	66.6667	15.625	66.6667	73.3333	12.5	35	5
33423	45.8333	15.625	87.5	71.4286	25	25	5
33424	79.1667	15.625	95.8333	83.3333	14.5833	25	5
33426	54.1667	15.625	83.3333	71.6667	22.7273	40	4
33427	62.5	21.875	100	83.3333	29.1667	35	5
33428	25	34.375	95.8333	61.6667	37.5	0	4
33429	83.3333	6.25	83.3333	83.3333	11.3636	40	5
33430	79.1667	18.75	91.6667	78.3333	20.8333	20	5
33431	87.5	25	83.3333	83.3333	20.8333	20	3
33432	91.6667	25	100	96.6667	22.9167	35	4
33433	50	0	100	76.6667	10.4167	15	5
33434	79.1667	37.5	91.6667	88.3333	37.5	20	3
33436	79.1667	15.625	95.8333	88.3333	20.8333	30	4
33437	33.3333	28.125	83.3333	60	33.3333	0	5
33438	79.1667	3.125	87.5	85	4.16667	30	5
33439	33.3333	31.25	66.6667	61.6667	33.3333	10	5
33440	87.5	6.25	87.5	90	6.25	35	6
33442	58.3333	12.5	100	83.3333	18.75	25	3
33444	54.1667	31.25	95.8333	78.3333	33.3333	40	5
33445	83.3333	12.5	95.8333	93.3333	31.25	25	4
33446	75	25	91.6667	81.6667	25	50	5
33448	62.5	28.125	70.8333	70	35.4167	50	4
33451	58.3333	75	54.1667	68.3333	72.5	45	6
33452	45.8333	40.625	79.1667	73.3333	50	35	5
33453	79.1667	6.25	95.8333	90	8.33333	30	5
33455	62.5	18.75	83.3333	70	18.75	35	5
33457	100	12.5	91.6667	93.3333	25	15	3
33458	62.5	21.875	83.3333	76.6667	27.0833	45	5
33459	58.3333	15.625	66.6667	63.3333	16.6667	25	5
33460	79.1667	15.625	91.6667	81.6667	12.5	20	5
33461	70.8333	0	91.6667	78.3333	2.08333	25	3
33462	66.6667	50	95.8333	85	45.8333	6.25	6
33463	91.6667	0	91.6667	91.6667	0	45	4
33464	91.6667	15.625	95.8333	95	12.5	20	4
33465	50	37.5	95.8333	73.3333	35.4167	40	4
33466	66.6667	37.5	75	73.3333	39.5833	25	5
33467	75	6.25	87.5	73.3333	12.5	30	3
33468	54.1667	21.875	79.1667	76.6667	27.0833	30	5
33469	58.3333	15.625	100	81.6667	22.9167	15	5
33471	41.6667	59.375	50	53.3333	62.5	55	4
33472	50	18.75	83.3333	61.6667	16.6667	5	4
33474	91.6667	6.25	83.3333	88.3333	14.5833	40	3
33476	87.5	3.125	91.6667	88.3333	4.16667	35	3
33477	54.1667	21.875	79.1667	68.3333	27.0833	20	5
33478	25	43.75	70.8333	60	45.4545	25	5
33479	83.3333	25	87.5	88.3333	31.25	40	5
33480	50	18.75	91.6667	73.3333	37.5	25	4
33481	54.1667	25	83.3333	68.3333	25	30	4
33482	62.5	18.75	70.8333	66.6667	27.0833	15	6
33483	45.8333	12.5	91.6667	71.6667	29.1667	25	4
33484	87.5	6.25	83.3333	80	10.4167	30	4
33485	66.6667	9.375	91.6667	83.3333	12.5	20	2
33486	75	37.5	87.5	86.6667	35.4167	15	5
33487	79.1667	28.125	91.6667	88.3333	25	20	4
33488	58.3333	9.375	54.1667	61.6667	14.5833	37.5	5
33489	62.5	15.625	79.1667	71.6667	14.5833	20	5
33490	87.5	9.375	91.6667	88.3333	12.5	80	3
33491	66.6667	21.875	91.6667	80	25	30	5
33492	54.1667	53.125	91.6667	73.3333	52.0833	15	4
33493	62.5	6.25	91.6667	66.6667	14.5833	55	5
33494	91.6667	0	100	90	4.16667	25	6
33495	79.1667	3.125	91.6667	88.3333	10.4167	25	5
33496	58.3333	28.125	83.3333	76.6667	31.25	40	6
33497	25	18.75	87.5	60	20.8333	10	3
33498	45.8333	31.25	87.5	75	39.5833	15	3
33499	75	37.5	100	86.6667	31.8182	10	5
33501	75	6.25	66.6667	75	6.25	40	3
33502	29.1667	18.75	45.8333	44.6429	20.8333	20	5
33505	58.3333	3.125	91.6667	80	4.16667	20	3
33506	66.6667	31.25	79.1667	80	25	43.75	5
33507	25	37.5	91.6667	53.3333	33.3333	20	5
33508	87.5	15.625	79.1667	85	14.5833	30	4
33509	66.6667	12.5	95.8333	76.6667	20.8333	20	5
33510	91.6667	50	95.8333	96.6667	43.75	35	5
33511	79.1667	25	79.1667	88.3333	22.9167	35	5
33512	75	31.25	95.8333	86.6667	33.3333	15	5
33513	45.8333	18.75	95.8333	66.6667	22.9167	15	3
33514	70.8333	12.5	91.6667	78.3333	18.75	25	5
33516	79.1667	9.375	79.1667	85	14.5833	10	5
33517	62.5	50	66.6667	65	45.8333	30	5
33518	87.5	78.125	100	91.6667	64.5833	50	5
33519	75	9.375	87.5	81.6667	16.6667	15	3
33520	58.3333	12.5	70.8333	70	14.5833	30	7
33521	58.3333	37.5	87.5	70	33.3333	10	5
33522	70.8333	12.5	87.5	81.6667	20.8333	25	3
33523	66.6667	0	87.5	71.6667	8.33333	15	4
33524	83.3333	6.25	95.8333	86.6667	6.25	15	5
33525	70.8333	25	79.1667	76.6667	33.3333	20	7
33526	79.1667	15.625	100	91.0714	16.6667	0	5
33528	58.3333	21.875	83.3333	63.3333	27.0833	25	3
33529	50	31.25	70.8333	61.6667	29.1667	25	5
33530	58.3333	12.5	95.8333	76.6667	12.5	10	5
33531	83.3333	0	100	91.6667	4.16667	50	5
33532	62.5	18.75	90	81.6667	25	20	3
33534	66.6667	31.25	95.8333	85	35.4167	20	4
33535	37.5	9.375	83.3333	63.3333	12.5	15	5
33536	66.6667	46.875	87.5	81.6667	43.75	30	5
33539	54.1667	68.75	95.8333	71.6667	60.4167	30	5
33540	45.8333	6.25	100	73.3333	16.6667	10	5
33541	54.1667	46.875	75	65	45.8333	55	5
33542	54.1667	46.875	70.8333	61.6667	45.8333	20	5
33543	100	6.25	91.6667	98.3333	8.33333	5	5
33544	58.3333	9.375	91.6667	78.3333	12.5	25	3
33545	100	0	95.8333	91.6667	0	25	5
33546	83.3333	28.125	100	90	27.0833	40	5
33547	70.8333	3.125	91.6667	83.3333	4.16667	20	3
33549	75	12.5	91.6667	80	18.75	25	6
33550	16.6667	0	100	63.3333	14.5833	10	4
33552	70.8333	31.25	87.5	66.6667	25	30	3
33553	54.1667	50	50	58.3333	45.8333	30	5
33554	50	18.75	75	66.6667	18.75	25	5
33555	83.3333	6.25	91.6667	86.6667	10.4167	35	3
33556	87.5	9.375	83.3333	80	6.25	40	5
33557	66.6667	21.875	79.1667	76.6667	25	20	7
33558	45.8333	34.375	75	70	22.9167	15	4
33559	62.5	3.125	83.3333	71.6667	8.33333	40	5
33560	70.8333	6.25	95.8333	81.6667	6.25	25	4
33562	54.1667	9.375	95.8333	76.6667	14.5833	20	4
33563	58.3333	40.625	60	64.2857	33.3333	30	6
33564	91.6667	3.125	83.3333	91.6667	8.33333	35	4
33565	83.3333	31.25	87.5	86.6667	27.0833	20	4
33566	33.3333	34.375	91.6667	61.6667	35.4167	18.75	5
33567	58.3333	21.875	87.5	75	25	10	5
33568	29.1667	9.375	83.3333	56.6667	18.75	20	4
33569	50	6.25	87.5	70	14.5833	35	3
33570	54.1667	31.25	66.6667	61.6667	29.1667	15	5
33571	29.1667	37.5	66.6667	56.6667	31.25	10	7
33572	50	12.5	79.1667	63.3333	16.6667	20	4
33573	37.5	12.5	75	61.6667	20.8333	20	3
33575	62.5	15.625	87.5	73.3333	20.8333	25	3
33576	54.1667	3.125	95.8333	78.3333	12.5	12.5	5
33577	66.6667	25	87.5	78.3333	29.1667	25	5
33580	54.1667	21.875	65	59.6154	22.9167	20	5
33582	45.8333	12.5	70.8333	65	22.9167	25	5
33583	70.8333	15.625	85	76.6667	18.75	35	3
33584	66.6667	50	75	78.3333	43.75	25	3
33585	45.8333	46.875	75	55	47.9167	25	5
33586	75	31.25	95.8333	88.3333	31.25	30	5
33587	62.5	40.625	70.8333	70	43.75	50	5
33588	79.1667	25	95.8333	86.6667	22.9167	40	5
33589	58.3333	34.375	66.6667	64.2857	35.4167	12.5	7
33590	79.1667	21.875	75	80	25	40	4
33591	54.1667	28.125	70.8333	71.6667	27.0833	25	5
33593	54.1667	21.875	79.1667	68.3333	31.25	5	4
33595	62.5	6.25	100	85	14.5833	5	5
33597	62.5	15.625	95.8333	73.3333	27.0833	25	4
33598	37.5	40.625	62.5	58.3333	47.9167	20	5
33601	79.1667	81.25	100	91.6667	83.3333	75	4
33602	37.5	71.875	83.3333	63.3333	64.5833	15	5
33603	50	18.75	100	78.3333	27.0833	25	5
33604	58.3333	37.5	83.3333	66.6667	31.25	10	5
33605	83.3333	31.25	87.5	81.6667	35.4167	50	5
33606	62.5	21.875	87.5	71.6667	25	25	4
33607	54.1667	3.125	95.8333	73.3333	6.25	25	5
33608	75	6.25	91.6667	78.3333	12.5	30	5
33609	25	31.25	91.6667	55	33.3333	0	5
33614	45.8333	12.5	91.6667	73.3333	20.8333	20	5
33615	54.1667	40.625	95.8333	76.6667	45.8333	20	5
33616	66.6667	40.625	58.3333	71.6667	41.6667	45	5
33617	66.6667	31.25	79.1667	73.3333	31.25	5	6
33620	75	21.875	75	73.3333	18.75	40	5
33621	83.3333	15.625	95.8333	86.6667	18.75	20	5
33622	41.6667	18.75	79.1667	61.6667	27.0833	20	4
33623	79.1667	9.375	91.6667	80	12.5	20	4
33624	95.8333	0	100	93.3333	2.08333	40	3
33625	33.3333	43.75	75	63.3333	47.9167	35	3
33626	75	15.625	100	88.3333	20.8333	30	4
33627	54.1667	12.5	87.5	75	20.8333	25	4
33628	87.5	12.5	83.3333	83.3333	8.33333	30	5
33629	41.6667	0	91.6667	65	8.33333	10	5
33630	87.5	3.125	95.8333	90	6.25	20	5
33631	45.8333	15.625	75	63.3333	14.5833	20	3
33632	66.6667	37.5	83.3333	76.6667	35.4167	25	5
33634	75	21.875	87.5	83.3333	20.8333	25	5
33636	50	43.75	75	68.3333	43.75	40	5
33637	54.1667	28.125	87.5	73.3333	27.0833	25	4
33638	45.8333	43.75	79.1667	60	41.6667	35	4
33639	70.8333	12.5	79.1667	78.3333	18.75	45	5
33640	45.8333	28.125	54.1667	58.3333	22.9167	25	3
33641	62.5	34.375	65	73.2143	37.5	50	5
33642	75	18.75	100	86.6667	18.1818	25	3
33643	75	34.375	91.6667	85	33.3333	35	5
33646	66.6667	21.875	100	83.3333	22.9167	20	3
33647	87.5	3.125	100	90	6.25	45	6
33648	58.3333	18.75	83.3333	70	20.8333	25	5
33649	91.6667	12.5	95.8333	88.3333	14.5833	35	3
33651	91.6667	0	95.8333	93.3333	4.16667	25	4
33652	70.8333	25	62.5	71.6667	25	35	3
33653	54.1667	34.375	87.5	70	39.5833	25	8
33654	75	43.75	100	90	45.8333	35	5
33655	58.3333	3.125	95.8333	76.6667	6.25	25	5
33656	66.6667	18.75	95.8333	80	18.75	10	5
33658	75	6.25	95.8333	75	10.4167	30	4
33659	45.8333	15.625	62.5	58.3333	22.9167	35	4
33660	54.1667	12.5	75	65	14.5833	35	5
33663	95.8333	9.375	95	95	12.5	20	5
33664	54.1667	9.375	95.8333	76.6667	16.6667	25	5
33665	37.5	15.625	95.8333	73.3333	20.8333	20	6
33666	33.3333	6.25	100	70	12.5	20	4
33667	91.6667	0	91.6667	90	0	30	5
33668	45.8333	31.25	91.6667	65	35.4167	40	5
33669	70.8333	50	70.8333	70	39.5833	30	4
33670	25	21.875	66.6667	55	22.9167	15	5
33671	41.6667	9.375	70.8333	58.3333	6.25	5	3
33672	50	15.625	91.6667	71.6667	10.4167	40	5
33673	75	15.625	75	75	20.8333	30	5
33674	62.5	0	87.5	80	8.33333	20	5
33676	75	21.875	79.1667	78.3333	20.8333	25	4
33677	75	15.625	91.6667	80	10.4167	50	6
33678	62.5	37.5	100	78.3333	39.5833	25	5
33679	66.6667	31.25	87.5	76.6667	27.0833	40	6
33680	33.3333	18.75	91.6667	60	20.8333	25	5
33681	50	17.8571	91.6667	70	22.7273	15	5
33683	75	12.5	79.1667	75	12.5	20	5
33684	70.8333	18.75	75	80	14.5833	45	3
33685	66.6667	43.75	66.6667	65	41.6667	35	7
33686	70.8333	28.125	87.5	78.3333	27.0833	40	5
33687	66.6667	28.125	62.5	66.6667	31.25	45	5
33688	54.1667	21.875	66.6667	70	20.8333	30	4
33689	54.1667	31.25	75	70	31.25	40	4
33692	58.3333	62.5	87.5	71.6667	50	20	5
33693	54.1667	56.25	87.5	73.3333	43.75	15	5
33694	58.3333	12.5	91.6667	78.3333	12.5	20	4
33695	58.3333	40.625	83.3333	75	37.5	40	5
33696	62.5	21.875	95.8333	81.6667	22.9167	35	5
33698	29.1667	56.25	91.6667	63.3333	60.4167	35	7
33699	45.8333	6.25	95.8333	70	14.5833	20	5
33701	66.6667	18.75	100	80	20.8333	15	3
33703	87.5	3.125	87.5	73.3333	10.4167	25	5
33704	50	40.625	91.6667	73.3333	37.5	35	5
33705	45.8333	68.75	87.5	70	54.1667	45	6
33706	12.5	21.875	70.8333	48.3333	20.8333	5	3
33707	75	21.875	70.8333	76.6667	20.8333	35	5
33708	58.3333	50	91.6667	76.6667	47.9167	35	5
33709	54.1667	6.25	87.5	76.6667	16.6667	10	5
33710	66.6667	12.5	87.5	83.3333	20.8333	45	4
33711	79.1667	9.375	91.6667	85	10.4167	25	4
33712	79.1667	35.7143	79.1667	85	36.3636	25	5
33713	75	31.25	87.5	75	35.4167	30	5
33714	45.8333	50	83.3333	61.6667	41.6667	25	4
33715	20.8333	34.375	87.5	57.1429	36.3636	10	4
33716	50	9.375	91.6667	71.6667	14.5833	15	3
33717	83.3333	15.625	79.1667	80	18.75	35	5
33718	66.6667	37.5	95.8333	80	35.4167	35	4
33719	83.3333	15.625	100	85	14.5833	30	5
33720	83.3333	21.875	79.1667	76.6667	16.6667	30	5
33721	50	12.5	95.8333	80	22.9167	20	5
33722	41.6667	40.625	79.1667	61.6667	37.5	20	4
33723	54.1667	21.875	83.3333	68.3333	29.1667	20	5
33724	16.6667	31.25	75	46.6667	41.6667	25	5
33725	45.8333	50	55	62.5	37.5	30	3
33726	54.1667	6.25	91.6667	71.6667	10.4167	10	4
33727	41.6667	34.375	87.5	58.3333	29.1667	35	5
33728	50	12.5	87.5	70	18.75	5	5
33729	41.6667	9.375	83.3333	66.6667	25	20	4
33730	58.3333	64.2857	50	60	59.0909	30	5
33731	66.6667	18.75	87.5	78.3333	20.8333	40	4
33732	95.8333	56.25	79.1667	93.3333	52.0833	60	4
33733	58.3333	68.75	66.6667	61.6667	56.25	30	5
33734	54.1667	21.875	95.8333	76.6667	22.9167	25	4
33735	75	53.125	87.5	78.3333	41.6667	10	4
33737	20.8333	53.125	80	51.7857	50	5	4
33739	65	3.125	58.3333	66.0714	14.5833	45	3
33740	50	15.625	91.6667	66.6667	18.75	10	5
33742	41.6667	53.125	70.8333	63.3333	58.3333	43.75	4
33743	83.3333	0	83.3333	86.6667	14.5833	25	5
33744	62.5	31.25	87.5	71.6667	29.1667	25	5
33745	54.1667	65.625	75	66.6667	62.5	55	4
33746	70.8333	37.5	87.5	80	39.5833	20	4
33748	58.3333	34.375	87.5	73.3333	33.3333	30	5
33750	66.6667	0	87.5	80	2.08333	30	4
33751	70.8333	12.5	95.8333	80	18.75	50	5
33753	70.8333	18.75	83.3333	75	20.8333	15	5
33754	79.1667	12.5	83.3333	81.6667	16.6667	15	3
33755	25	12.5	100	63.3333	16.6667	20	3
33756	95.8333	28.125	79.1667	93.3333	18.75	50	5
33758	54.1667	25	66.6667	60	25	35	5
33759	62.5	53.5714	54.1667	66.6667	45.4545	45	5
33760	70.8333	37.5	83.3333	78.3333	29.1667	55	4
33761	50	18.75	70.8333	55	20.8333	25	5
33762	58.3333	37.5	87.5	80	33.3333	20	4
33763	83.3333	12.5	70.8333	80	8.33333	35	3
33764	66.6667	37.5	75	75	37.5	40	7
33765	37.5	53.125	70.8333	58.3333	43.75	30	4
33767	66.6667	71.875	100	86.6667	54.1667	40	5
33768	75	46.875	87.5	80	37.5	40	4
33770	66.6667	15.625	75	66.6667	16.6667	35	6
33771	70.8333	9.375	70.8333	70	12.5	40	4
33772	95.8333	0	100	96.6667	2.08333	45	4
33773	66.6667	25	95.8333	81.6667	33.3333	30	5
33774	58.3333	28.125	58.3333	61.6667	22.9167	15	4
33775	62.5	18.75	62.5	65	16.6667	30	7
33776	90	40.625	60	71.4286	37.5	75	3
33777	54.1667	46.875	95.8333	70	31.25	15	5
33780	54.1667	21.875	87.5	66.6667	29.1667	45	5
33781	95.8333	0	100	96.6667	4.16667	35	3
33782	70.8333	25	70.8333	75	22.9167	30	5
33783	70.8333	12.5	70.8333	76.6667	20.8333	55	6
33784	41.6667	6.25	75	61.6667	14.5833	20	4
33785	62.5	21.875	66.6667	71.6667	25	55	5
33786	25	78.125	66.6667	53.3333	58.3333	30	5
33787	66.6667	18.75	95.8333	78.3333	25	25	5
33788	79.1667	0	91.6667	85	2.08333	35	5
33789	62.5	37.5	79.1667	76.6667	35.4167	12.5	4
33790	45.8333	28.125	79.1667	63.3333	29.1667	15	3
33791	58.3333	0	62.5	56.6667	6.25	10	5
33792	79.1667	6.25	83.3333	71.6667	12.5	20	5
33793	29.1667	28.125	91.6667	63.3333	27.0833	25	4
33794	79.1667	34.375	70.8333	78.3333	31.25	50	5
33795	45.8333	15.625	87.5	70	22.9167	5	5
33798	37.5	21.875	50	35	20.8333	15	5
33799	83.3333	40.625	62.5	68.3333	37.5	45	5
33801	66.6667	12.5	79.1667	70	18.75	20	6
33802	70.8333	21.875	95.8333	86.6667	22.9167	20	5
33803	37.5	18.75	91.6667	63.3333	22.9167	30	4
33804	91.6667	18.75	83.3333	93.3333	25	45	5
33805	37.5	28.125	50	61.6667	31.25	25	5
33806	25	3.125	95.8333	61.6667	10.4167	5	4
33807	41.6667	18.75	58.3333	63.3333	33.3333	25	4
33808	50	18.75	91.6667	70	25	5	4
33809	33.3333	56.25	41.6667	43.3333	45.8333	60	5
33810	75	0	95.8333	88.3333	14.5833	15	5
33811	95.8333	15.625	66.6667	85	16.6667	35	5
33812	62.5	25	87.5	75	25	30	4
33813	55	15.625	83.3333	69.6429	18.75	30	5
33814	87.5	28.125	66.6667	81.6667	33.3333	45	5
33815	50	50	66.6667	65	52.2727	55	5
33816	50	25	87.5	76.6667	29.1667	15	5
33817	45.8333	31.25	87.5	71.6667	41.6667	40	5
33818	87.5	53.125	100	81.6667	47.9167	70	5
33819	66.6667	6.25	91.6667	76.6667	10.4167	10	5
33820	29.1667	18.75	83.3333	55	20.8333	5	5
33821	66.6667	28.125	95.8333	83.3333	33.3333	20	5
33822	62.5	37.5	41.6667	56.6667	27.0833	20	6
33823	33.3333	21.875	83.3333	63.3333	18.75	5	5
33824	37.5	21.875	66.6667	60	22.9167	15	6
33825	79.1667	18.75	100	90	20.8333	50	5
33826	87.5	15.625	83.3333	91.6667	16.6667	30	5
33829	58.3333	28.125	75	71.6667	31.25	40	5
33830	75	0	75	75	2.08333	20	5
33833	66.6667	21.875	79.1667	73.3333	22.9167	50	5
33834	50	18.75	54.1667	56.6667	18.75	20	4
33835	79.1667	25	91.6667	83.3333	25	40	6
33837	58.3333	31.25	75	68.3333	33.3333	40	5
33838	33.3333	40.625	58.3333	55	39.5833	25	5
33839	83.3333	28.125	100	86.6667	22.9167	20	4
33841	75	25	91.6667	86.6667	27.0833	5	5
33842	75	40.625	79.1667	75	39.5833	45	3
33843	54.1667	56.25	41.6667	63.3333	54.1667	45	8
33844	66.6667	59.375	79.1667	78.3333	47.9167	45	5
33846	45.8333	28.125	95.8333	71.6667	33.3333	30	3
33847	70.8333	43.75	87.5	83.3333	35.4167	15	5
33848	62.5	6.25	66.6667	63.3333	10.4167	10	4
33849	66.6667	9.375	100	80	12.5	30	5
33852	62.5	3.125	75	75	14.5833	10	3
33853	54.1667	34.375	75	70	35.4167	20	4
33854	66.6667	25	100	76.6667	25	25	5
33855	45.8333	28.125	58.3333	58.3333	29.1667	25	5
33856	70.8333	15.625	91.6667	83.3333	22.9167	25	4
33857	41.6667	12.5	50	51.6667	18.75	15	3
33858	50	40.625	75	63.3333	39.5833	25	4
33859	54.1667	25	87.5	71.6667	27.0833	5	3
33860	54.1667	12.5	79.1667	61.6667	18.75	30	5
33861	58.3333	40.625	70.8333	66.6667	39.5833	50	4
33862	70.8333	18.75	65	69.6429	16.6667	45	5
33863	95.8333	15.625	83.3333	88.3333	27.0833	35	5
33864	75	25	87.5	83.3333	31.25	45	6
33865	54.1667	43.75	91.6667	76.6667	37.5	10	5
33866	55	15.625	83.3333	78.5714	22.9167	45	3
33867	79.1667	50	83.3333	83.3333	45.8333	45	5
33868	66.6667	9.375	91.6667	76.6667	18.75	20	5
33869	58.3333	25	45.8333	56.6667	29.1667	25	4
33870	25	34.375	100	65	35.4167	5	5
33871	54.1667	34.375	66.6667	61.6667	31.25	20	5
33872	70.8333	21.875	79.1667	81.6667	20.8333	30	5
33873	62.5	34.375	70.8333	70	27.0833	20	5
33874	12.5	18.75	79.1667	40	25	15	4
33875	45.8333	28.125	70.8333	63.3333	29.1667	25	5
33876	70.8333	40.625	75	73.3333	35.4167	35	4
33877	66.6667	43.75	58.3333	66.6667	35.4167	30	4
33878	54.1667	12.5	87.5	78.5714	22.9167	40	7
33879	25	18.75	66.6667	51.6667	20.8333	15	5
33881	83.3333	12.5	100	86.6667	20.8333	15	5
33882	41.6667	31.25	62.5	55	33.3333	15	4
33883	83.3333	12.5	75	73.3333	16.6667	15	4
33884	50	25	83.3333	71.6667	27.0833	30	3
33885	50	56.25	75	60	45.8333	35	5
33886	83.3333	12.5	83.3333	80	10.4167	35	5
33887	70.8333	18.75	91.6667	75	22.9167	40	4
33888	50	37.5	45.8333	51.6667	39.5833	15	3
33889	75	18.75	54.1667	71.6667	20.8333	20	3
33890	37.5	25	62.5	45	25	15	4
33891	70.8333	31.25	79.1667	75	29.1667	25	5
33892	58.3333	15.625	75	66.6667	29.1667	30	4
33893	58.3333	37.5	83.3333	73.3333	37.5	45	4
33894	54.1667	34.375	50	63.3333	31.25	25	5
33895	83.3333	17.8571	79.1667	78.3333	20.4545	45	5
33896	75	25	87.5	80	22.9167	20	4
33897	66.6667	25	87.5	83.3333	22.9167	25	5
33898	54.1667	43.75	83.3333	75	37.5	30	6
33900	58.3333	18.75	83.3333	81.6667	29.1667	20	3
33901	95.8333	9.375	95.8333	85	10.4167	35	5
33902	33.3333	21.875	75	56.6667	20.8333	15	3
34854	62.5	9.375	62.5	68.3333	16.6667	30	4
34855	75	28.125	66.6667	76.6667	35.4167	30	5
34856	54.1667	12.5	83.3333	73.3333	25	20	4
34857	45.8333	25	54.1667	56.6667	22.9167	30	5
34859	70.8333	15.625	91.6667	81.6667	18.75	25	4
34861	41.6667	9.375	83.3333	68.3333	16.6667	37.5	5
34862	83.3333	3.125	70.8333	80	12.5	65	5
34863	87.5	6.25	83.3333	86.6667	8.33333	55	5
34864	83.3333	0	79.1667	78.3333	2.08333	15	3
34865	45.8333	43.75	79.1667	68.3333	37.5	40	5
34866	79.1667	68.75	83.3333	86.6667	56.25	30	3
34867	58.3333	28.125	95.8333	75	37.5	50	8
34868	79.1667	25	95.8333	90	29.1667	35	5
34870	50	12.5	58.3333	61.6667	20.8333	30	5
34872	54.1667	21.875	70.8333	63.3333	25	15	5
34873	70.8333	21.875	91.6667	78.3333	22.9167	15	5
34874	58.3333	3.125	83.3333	75	8.33333	10	5
34875	70.8333	9.375	75	76.6667	8.33333	50	5
34876	83.3333	9.375	75	85	12.5	20	5
34877	50	28.125	83.3333	66.6667	29.5455	10	5
34878	66.6667	3.125	87.5	76.6667	16.6667	20	5
34879	58.3333	53.125	83.3333	78.3333	41.6667	60	3
34880	20.8333	21.875	83.3333	55	25	20	5
34881	54.1667	18.75	95.8333	76.6667	22.9167	15	5
34882	62.5	34.375	75	73.3333	29.1667	40	5
34883	62.5	40.625	70.8333	68.3333	45.8333	45	5
34884	37.5	0	33.3333	53.3333	6.81818	20	6
34885	66.6667	37.5	83.3333	80	39.5833	20	4
34886	29.1667	25	33.3333	26.6667	22.9167	15	5
34887	75	18.75	83.3333	78.3333	16.6667	5	4
34888	100	37.5	75	86.6667	45.8333	10	4
34889	58.3333	37.5	83.3333	70	33.3333	20	3
34890	66.6667	46.875	70.8333	71.6667	50	40	4
34891	50	28.125	83.3333	65	20.8333	25	3
34892	37.5	40.625	54.1667	48.3333	39.5833	35	5
34893	37.5	0	91.6667	61.6667	4.16667	5	5
34894	66.6667	21.875	45.8333	61.6667	18.75	15	5
34895	54.1667	53.125	70.8333	70	50	20	5
34896	62.5	18.75	70.8333	68.3333	22.9167	25	5
34897	83.3333	15.625	83.3333	80	14.5833	35	5
34898	45.8333	9.375	66.6667	61.6667	6.25	15	3
34899	45.8333	18.75	91.6667	65	25	40	4
34900	41.6667	18.75	87.5	63.3333	20.8333	30	4
34901	33.3333	25	91.6667	66.6667	25	5	5
34903	70.8333	7.14286	87.5	80	13.6364	40	3
34904	75	15.625	95.8333	73.3333	18.75	35	3
34906	75	50	58.3333	73.3333	56.25	60	6
34907	79.1667	6.25	70.8333	76.6667	16.6667	37.5	4
34908	37.5	43.75	79.1667	60	41.6667	45	4
34909	79.1667	15.625	95.8333	81.6667	16.6667	75	4
34910	62.5	6.25	66.6667	63.3333	10.4167	30	5
34912	62.5	25	100	78.3333	20.8333	15	3
34913	70.8333	50	79.1667	70	45.8333	35	5
34914	58.3333	15.625	95	69.6429	18.75	20	3
34915	50	34.375	95.8333	65	27.0833	15	3
34917	79.1667	18.75	83.3333	86.6667	22.9167	20	3
34918	75	9.375	54.1667	66.6667	16.6667	20	5
34919	83.3333	56.25	83.3333	80	47.9167	10	4
34921	62.5	65.625	62.5	70	56.25	40	2
34922	75	12.5	83.3333	85	18.75	20	4
34923	66.6667	3.125	75	78.3333	8.33333	35	5
34924	58.3333	25	70.8333	63.3333	27.2727	30	5
34925	58.3333	31.25	95.8333	76.6667	27.0833	25	5
34926	54.1667	50	66.6667	65	41.6667	35	4
34927	75	10.7143	83.3333	76.6667	18.1818	25	5
34928	45.8333	6.25	54.1667	50	8.33333	30	5
34929	70.8333	25	87.5	83.3333	20.8333	25	5
34930	91.6667	9.375	87.5	90	8.33333	35	4
34931	37.5	43.75	79.1667	63.3333	39.5833	45	5
34932	66.6667	43.75	87.5	83.3333	41.6667	35	5
34934	79.1667	21.875	83.3333	83.3333	18.75	30	4
34935	45.8333	15.625	95.8333	75	22.9167	20	5
34936	79.1667	43.75	87.5	76.6667	37.5	15	5
[truncated: 304 more rows]
